# Supplementary material
Source: publisher figshare collection journal article supplement (https://springernature.figshare.com/articles/dataset/_/22672735)
Supplement: Supplementary file 1 [file 1]

## Sheet: 2b
Gr		30		100		200		300
23.14	138	23.14	5124	23.14	145	23.14	148	23.14	176
23.16	133	23.16	5328	23.16	163	23.16	165	23.16	187
23.18	122	23.18	5210	23.18	149	23.18	154	23.18	160
23.2	138	23.2	5225	23.2	139	23.2	155	23.2	166
23.22	141	23.22	5173	23.22	157	23.22	146	23.22	199
23.24	161	23.24	5234	23.24	146	23.24	151	23.24	155
23.26	155	23.26	5160	23.26	132	23.26	172	23.26	217
23.28	145	23.28	5182	23.28	166	23.28	141	23.28	186
23.3	131	23.3	5205	23.3	143	23.3	143	23.3	197
23.32	144	23.32	5204	23.32	163	23.32	159	23.32	173
23.34	162	23.34	5102	23.34	161	23.34	134	23.34	172
23.36	140	23.36	5228	23.36	169	23.36	146	23.36	181
23.38	141	23.38	5170	23.38	146	23.38	136	23.38	163
23.4	145	23.4	5143	23.4	156	23.4	150	23.4	170
23.42	156	23.42	5017	23.42	160	23.42	133	23.42	193
23.44	152	23.44	5127	23.44	157	23.44	164	23.44	193
23.46	138	23.46	5206	23.46	167	23.46	140	23.46	190
23.48	128	23.48	5168	23.48	150	23.48	149	23.48	170
23.5	150	23.5	5156	23.5	163	23.5	126	23.5	178
23.52	133	23.52	5153	23.52	154	23.52	152	23.52	175
23.54	137	23.54	5363	23.54	169	23.54	128	23.54	210
23.56	148	23.56	5196	23.56	162	23.56	136	23.56	207
23.58	131	23.58	5232	23.58	165	23.58	132	23.58	188
23.6	142	23.6	5227	23.6	154	23.6	135	23.6	181
23.62	133	23.62	5231	23.62	169	23.62	136	23.62	195
23.64	142	23.64	5251	23.64	152	23.64	150	23.64	195
23.66	148	23.66	5098	23.66	158	23.66	162	23.66	207
23.68	150	23.68	5278	23.68	145	23.68	151	23.68	234
23.7	140	23.7	5287	23.7	187	23.7	133	23.7	217
23.72	165	23.72	5195	23.72	172	23.72	154	23.72	220
23.74	140	23.74	5203	23.74	180	23.74	142	23.74	206
23.76	144	23.76	5218	23.76	179	23.76	157	23.76	245
23.78	158	23.78	5419	23.78	171	23.78	140	23.78	228
23.8	135	23.8	5272	23.8	181	23.8	150	23.8	228
23.82	164	23.82	5277	23.82	193	23.82	172	23.82	245
23.84	158	23.84	5207	23.84	191	23.84	155	23.84	273
23.86	163	23.86	5186	23.86	205	23.86	174	23.86	302
23.88	151	23.88	5187	23.88	223	23.88	132	23.88	329
23.9	125	23.9	5338	23.9	223	23.9	159	23.9	385
23.92	123	23.92	5359	23.92	244	23.92	149	23.92	404
23.94	163	23.94	5428	23.94	253	23.94	166	23.94	464
23.96	164	23.96	5294	23.96	273	23.96	154	23.96	533
23.98	171	23.98	5285	23.98	316	23.98	146	23.98	615
24	155	24	5374	24	317	24	158	24	706
24.02	133	24.02	5419	24.02	391	24.02	173	24.02	814
24.04	152	24.04	5362	24.04	476	24.04	177	24.04	962
24.06	134	24.06	5382	24.06	565	24.06	161	24.06	1182
24.08	145	24.08	5374	24.08	604	24.08	168	24.08	1335
24.1	170	24.1	5502	24.1	699	24.1	142	24.1	1529
24.12	148	24.12	5489	24.12	730	24.12	146	24.12	1692
24.14	134	24.14	5416	24.14	737	24.14	171	24.14	1887
24.16	160	24.16	5417	24.16	835	24.16	163	24.16	1974
24.18	140	24.18	5423	24.18	835	24.18	175	24.18	2023
24.2	138	24.2	5532	24.2	760	24.2	138	24.2	1950
24.22	158	24.22	5515	24.22	701	24.22	147	24.22	1931
24.24	151	24.24	5420	24.24	648	24.24	156	24.24	1924
24.26	161	24.26	5528	24.26	540	24.26	161	24.26	1731
24.28	159	24.28	5529	24.28	519	24.28	150	24.28	1611
24.3	137	24.3	5443	24.3	436	24.3	152	24.3	1519
24.32	142	24.32	5496	24.32	420	24.32	159	24.32	1351
24.34	159	24.34	5436	24.34	352	24.34	181	24.34	1334
24.36	182	24.36	5472	24.36	359	24.36	168	24.36	1299
24.38	144	24.38	5508	24.38	293	24.38	189	24.38	1172
24.4	144	24.4	5561	24.4	308	24.4	162	24.4	1070
24.42	168	24.42	5466	24.42	325	24.42	158	24.42	1037
24.44	143	24.44	5375	24.44	276	24.44	157	24.44	938
24.46	139	24.46	5526	24.46	258	24.46	181	24.46	866
24.48	152	24.48	5680	24.48	231	24.48	165	24.48	811
24.5	131	24.5	5823	24.5	255	24.5	186	24.5	782
24.52	134	24.52	5543	24.52	220	24.52	159	24.52	714
24.54	172	24.54	5590	24.54	224	24.54	167	24.54	673
24.56	146	24.56	5660	24.56	223	24.56	168	24.56	619
24.58	142	24.58	5613	24.58	230	24.58	146	24.58	581
24.6	169	24.6	5639	24.6	226	24.6	175	24.6	524
24.62	152	24.62	5753	24.62	218	24.62	177	24.62	522
24.64	159	24.64	5605	24.64	219	24.64	165	24.64	472
24.66	133	24.66	5716	24.66	231	24.66	169	24.66	423
24.68	154	24.68	5589	24.68	239	24.68	183	24.68	423
24.7	136	24.7	5735	24.7	200	24.7	188	24.7	389
24.72	170	24.72	5751	24.72	198	24.72	165	24.72	397
24.74	130	24.74	5607	24.74	196	24.74	169	24.74	385
24.76	151	24.76	5710	24.76	238	24.76	171	24.76	340
24.78	173	24.78	5639	24.78	205	24.78	210	24.78	338
24.8	174	24.8	5716	24.8	229	24.8	172	24.8	348
24.82	155	24.82	5650	24.82	229	24.82	156	24.82	323
24.84	144	24.84	5629	24.84	229	24.84	159	24.84	300
24.86	142	24.86	5764	24.86	243	24.86	198	24.86	300
24.88	150	24.88	5720	24.88	219	24.88	201	24.88	278
24.9	131	24.9	5863	24.9	245	24.9	212	24.9	266
24.92	166	24.92	5889	24.92	269	24.92	209	24.92	243
24.94	155	24.94	5922	24.94	270	24.94	211	24.94	287
24.96	137	24.96	5792	24.96	261	24.96	207	24.96	228
24.98	173	24.98	5876	24.98	254	24.98	243	24.98	252
25	160	25	5845	25	270	25	239	25	248
25.02	172	25.02	5903	25.02	285	25.02	249	25.02	257
25.04	150	25.04	5854	25.04	302	25.04	300	25.04	239
25.06	168	25.06	5947	25.06	311	25.06	288	25.06	252
25.08	164	25.08	5835	25.08	333	25.08	313	25.08	202
25.1	179	25.1	6092	25.1	364	25.1	347	25.1	239
25.12	169	25.12	5960	25.12	386	25.12	387	25.12	227
25.14	161	25.14	5982	25.14	431	25.14	435	25.14	233
25.16	153	25.16	5974	25.16	463	25.16	498	25.16	196
25.18	161	25.18	6174	25.18	483	25.18	589	25.18	216
25.2	163	25.2	6319	25.2	636	25.2	682	25.2	212
25.22	149	25.22	6102	25.22	737	25.22	820	25.22	211
25.24	148	25.24	6103	25.24	811	25.24	982	25.24	193
25.26	155	25.26	6117	25.26	893	25.26	1101	25.26	199
25.28	149	25.28	6309	25.28	1021	25.28	1295	25.28	196
25.3	160	25.3	6197	25.3	1177	25.3	1551	25.3	193
25.32	172	25.32	6244	25.32	1375	25.32	1741	25.32	201
25.34	176	25.34	6373	25.34	1563	25.34	2008	25.34	184
25.36	168	25.36	6309	25.36	1723	25.36	2144	25.36	193
25.38	169	25.38	6371	25.38	1808	25.38	2221	25.38	204
25.4	154	25.4	6587	25.4	1884	25.4	2262	25.4	192
25.42	159	25.42	6526	25.42	1884	25.42	2293	25.42	187
25.44	171	25.44	6670	25.44	1946	25.44	2075	25.44	180
25.46	170	25.46	6664	25.46	1602	25.46	1921	25.46	166
25.48	185	25.48	6571	25.48	1481	25.48	1701	25.48	179
25.5	195	25.5	6699	25.5	1207	25.5	1365	25.5	184
25.52	154	25.52	6841	25.52	997	25.52	1203	25.52	179
25.54	164	25.54	6746	25.54	795	25.54	1037	25.54	167
25.56	157	25.56	6959	25.56	624	25.56	938	25.56	154
25.58	173	25.58	7176	25.58	506	25.58	825	25.58	165
25.6	183	25.6	7203	25.6	461	25.6	755	25.6	175
25.62	157	25.62	7402	25.62	369	25.62	696	25.62	177
25.64	167	25.64	7424	25.64	334	25.64	728	25.64	151
25.66	182	25.66	7837	25.66	308	25.66	618	25.66	170
25.68	187	25.68	7910	25.68	319	25.68	557	25.68	174
25.7	184	25.7	8255	25.7	255	25.7	549	25.7	160
25.72	184	25.72	8453	25.72	231	25.72	516	25.72	173
25.74	168	25.74	8814	25.74	261	25.74	465	25.74	170
25.76	200	25.76	9241	25.76	278	25.76	420	25.76	183
25.78	199	25.78	9783	25.78	234	25.78	411	25.78	167
25.8	175	25.8	10542	25.8	231	25.8	358	25.8	164
25.82	186	25.82	11478	25.82	222	25.82	327	25.82	174
25.84	185	25.84	12705	25.84	218	25.84	310	25.84	161
25.86	173	25.86	14102	25.86	236	25.86	298	25.86	185
25.88	208	25.88	16433	25.88	202	25.88	280	25.88	167
25.9	204	25.9	19133	25.9	219	25.9	265	25.9	173
25.92	237	25.92	22398	25.92	211	25.92	278	25.92	181
25.94	247	25.94	25848	25.94	208	25.94	208	25.94	177
25.96	239	25.96	29460	25.96	214	25.96	223	25.96	169
25.98	227	25.98	32734	25.98	231	25.98	221	25.98	171
26	238	26	34734	26	190	26	237	26	157
26.02	260	26.02	35700	26.02	180	26.02	209	26.02	176
26.04	246	26.04	36189	26.04	205	26.04	206	26.04	171
26.06	283	26.06	34982	26.06	182	26.06	217	26.06	174
26.08	272	26.08	34365	26.08	170	26.08	187	26.08	155
26.1	303	26.1	32780	26.1	192	26.1	202	26.1	179
26.12	322	26.12	31752	26.12	194	26.12	202	26.12	179
26.14	350	26.14	30265	26.14	191	26.14	183	26.14	170
26.16	398	26.16	29147	26.16	176	26.16	178	26.16	143
26.18	428	26.18	28086	26.18	161	26.18	188	26.18	150
26.2	491	26.2	26885	26.2	176	26.2	181	26.2	170
26.22	571	26.22	25478	26.22	179	26.22	156	26.22	167
26.24	664	26.24	24469	26.24	200	26.24	164	26.24	168
26.26	766	26.26	23333	26.26	155	26.26	180	26.26	181
26.28	921	26.28	22716	26.28	175	26.28	183	26.28	155
26.3	1130	26.3	22090	26.3	148	26.3	156	26.3	151
26.32	1376	26.32	21543	26.32	168	26.32	175	26.32	162
26.34	1553	26.34	21084	26.34	196	26.34	169	26.34	162
26.36	1847	26.36	21074	26.36	189	26.36	176	26.36	165
26.38	2256	26.38	20769	26.38	198	26.38	148	26.38	145
26.4	2616	26.4	21339	26.4	160	26.4	168	26.4	157
26.42	3090	26.42	21250	26.42	152	26.42	160	26.42	152
26.44	3365	26.44	21602	26.44	168	26.44	171	26.44	163
26.46	3623	26.46	21823	26.46	144	26.46	167	26.46	155
26.48	3478	26.48	21717	26.48	139	26.48	145	26.48	156
26.5	3312	26.5	21354	26.5	167	26.5	163	26.5	149
26.52	3060	26.52	20690	26.52	160	26.52	160	26.52	149
26.54	2510	26.54	19746	26.54	144	26.54	165	26.54	148
26.56	1962	26.56	18503	26.56	147	26.56	159	26.56	140
26.58	1493	26.58	17259	26.58	172	26.58	171	26.58	151
26.6	1137	26.6	15860	26.6	149	26.6	155	26.6	150
26.62	802	26.62	14557	26.62	163	26.62	179	26.62	168
26.64	602	26.64	13285	26.64	171	26.64	156	26.64	161
26.66	466	26.66	12475	26.66	140	26.66	158	26.66	163
26.68	365	26.68	11261	26.68	168	26.68	182	26.68	153
26.7	334	26.7	10667	26.7	162	26.7	147	26.7	130
26.72	304	26.72	9830	26.72	161	26.72	171	26.72	162
26.74	275	26.74	9310	26.74	172	26.74	127	26.74	165
26.76	266	26.76	8835	26.76	162	26.76	156	26.76	140
26.78	284	26.78	8390	26.78	158	26.78	153	26.78	128
26.8	245	26.8	8215	26.8	151	26.8	157	26.8	177
26.82	257	26.82	7813	26.82	153	26.82	169	26.82	187
26.84	232	26.84	7772	26.84	163	26.84	152	26.84	152
26.86	221	26.86	7558	26.86	141	26.86	139	26.86	183
26.88	217	26.88	7429	26.88	162	26.88	188	26.88	162
26.9	230	26.9	7404	26.9	177	26.9	154	26.9	154
26.92	239	26.92	7033	26.92	161	26.92	157	26.92	160
26.94	219	26.94	6911	26.94	154	26.94	149	26.94	168
26.96	172	26.96	6804	26.96	140	26.96	165	26.96	149
26.98	197	26.98	6735	26.98	160	26.98	150	26.98	154

## Sheet: 2c
Gr		30		100		300
1400.55	161	1400.55	379	1400.55	6363	1400.55	1801
1401.52	169	1401.52	375	1401.52	6555	1401.52	1821
1402.49	179	1402.49	359	1402.49	6571	1402.49	1903
1403.47	169	1403.47	341	1403.47	6609	1403.47	1863
1404.44	175	1404.44	353	1404.44	6549	1404.44	1841
1405.41	163	1405.41	341	1405.41	6517	1405.41	1895
1406.39	169	1406.39	371	1406.39	6447	1406.39	1897
1407.36	171	1407.36	365	1407.36	6577	1407.36	1923
1408.33	163	1408.33	351	1408.33	6571	1408.33	1901
1409.31	173	1409.31	343	1409.31	6587	1409.31	1843
1410.28	163	1410.28	343	1410.28	6457	1410.28	1875
1411.25	169	1411.25	347	1411.25	6559	1411.25	1893
1412.22	162	1412.22	335	1412.22	6511	1412.22	1863
1413.2	175	1413.2	357	1413.2	6637	1413.2	1891
1414.17	171	1414.17	343	1414.17	6449	1414.17	1883
1415.14	153	1415.14	341	1415.14	6493	1415.14	1855
1416.11	156	1416.11	353	1416.11	6617	1416.11	1877
1417.09	160	1417.09	321	1417.09	6581	1417.09	1875
1418.06	169	1418.06	351	1418.06	6397	1418.06	1871
1419.03	160	1419.03	357	1419.03	6627	1419.03	1905
1420	162	1420	337	1420	6517	1420	1837
1420.97	144	1420.97	355	1420.97	6487	1420.97	1911
1421.94	157	1421.94	345	1421.94	6471	1421.94	1893
1422.91	143	1422.91	337	1422.91	6443	1422.91	1911
1423.89	157	1423.89	379	1423.89	6397	1423.89	1879
1424.86	157	1424.86	349	1424.86	6545	1424.86	1847
1425.83	144	1425.83	341	1425.83	6583	1425.83	1899
1426.8	147	1426.8	323	1426.8	6409	1426.8	1913
1427.77	143	1427.77	339	1427.77	6481	1427.77	1881
1428.74	148	1428.74	331	1428.74	6345	1428.74	1833
1429.71	154	1429.71	327	1429.71	6541	1429.71	1841
1430.68	151	1430.68	341	1430.68	6503	1430.68	1919
1431.65	170	1431.65	337	1431.65	6471	1431.65	1859
1432.62	153	1432.62	357	1432.62	6505	1432.62	1879
1433.59	145	1433.59	363	1433.59	6515	1433.59	1879
1434.56	159	1434.56	353	1434.56	6495	1434.56	1941
1435.53	161	1435.53	325	1435.53	6453	1435.53	1805
1436.5	156	1436.5	345	1436.5	6593	1436.5	1865
1437.47	153	1437.47	355	1437.47	6499	1437.47	1891
1438.44	149	1438.44	353	1438.44	6427	1438.44	1915
1439.41	141	1439.41	337	1439.41	6475	1439.41	1861
1440.38	143	1440.38	333	1440.38	6425	1440.38	1877
1441.35	146	1441.35	345	1441.35	6527	1441.35	1859
1442.32	145	1442.32	367	1442.32	6573	1442.32	1863
1443.29	145	1443.29	321	1443.29	6519	1443.29	1833
1444.26	153	1444.26	361	1444.26	6509	1444.26	1887
1445.22	146	1445.22	331	1445.22	6309	1445.22	1889
1446.19	139	1446.19	333	1446.19	6373	1446.19	1851
1447.16	138	1447.16	347	1447.16	6527	1447.16	1919
1448.13	138	1448.13	333	1448.13	6515	1448.13	1901
1449.1	142	1449.1	333	1449.1	6555	1449.1	1925
1450.07	148	1450.07	341	1450.07	6555	1450.07	1869
1451.03	128	1451.03	343	1451.03	6393	1451.03	1817
1452	143	1452	349	1452	6511	1452	1873
1452.97	144	1452.97	353	1452.97	6453	1452.97	1911
1453.94	152	1453.94	371	1453.94	6447	1453.94	1859
1454.9	161	1454.9	353	1454.9	6455	1454.9	1885
1455.87	156	1455.87	327	1455.87	6527	1455.87	1867
1456.84	149	1456.84	329	1456.84	6547	1456.84	1865
1457.81	144	1457.81	341	1457.81	6563	1457.81	1949
1458.77	143	1458.77	341	1458.77	6405	1458.77	1927
1459.74	144	1459.74	351	1459.74	6501	1459.74	1857
1460.71	144	1460.71	337	1460.71	6459	1460.71	1905
1461.67	145	1461.67	345	1461.67	6527	1461.67	1895
1462.64	141	1462.64	341	1462.64	6549	1462.64	1917
1463.61	146	1463.61	343	1463.61	6585	1463.61	1897
1464.58	146	1464.58	335	1464.58	6527	1464.58	1933
1465.54	149	1465.54	349	1465.54	6461	1465.54	1879
1466.51	143	1466.51	355	1466.51	6535	1466.51	1881
1467.47	154	1467.47	361	1467.47	6459	1467.47	1915
1468.44	140	1468.44	331	1468.44	6539	1468.44	1891
1469.4	153	1469.4	357	1469.4	6491	1469.4	1855
1470.37	150	1470.37	363	1470.37	6451	1470.37	1907
1471.34	153	1471.34	357	1471.34	6587	1471.34	1919
1472.3	152	1472.3	347	1472.3	6579	1472.3	1891
1473.27	150	1473.27	353	1473.27	6563	1473.27	1931
1474.23	148	1474.23	367	1474.23	6547	1474.23	1967
1475.2	160	1475.2	339	1475.2	6637	1475.2	1863
1476.16	158	1476.16	353	1476.16	6563	1476.16	1925
1477.13	149	1477.13	369	1477.13	6581	1477.13	1905
1478.09	146	1478.09	343	1478.09	6603	1478.09	1867
1479.06	152	1479.06	335	1479.06	6583	1479.06	1869
1480.02	156	1480.02	345	1480.02	6635	1480.02	1905
1480.99	149	1480.99	365	1480.99	6579	1480.99	1889
1481.95	146	1481.95	367	1481.95	6639	1481.95	1927
1482.92	156	1482.92	381	1482.92	6787	1482.92	1967
1483.88	161	1483.88	363	1483.88	6585	1483.88	1915
1484.84	148	1484.84	363	1484.84	6601	1484.84	1851
1485.81	170	1485.81	367	1485.81	6661	1485.81	1973
1486.77	173	1486.77	371	1486.77	6599	1486.77	1915
1487.73	149	1487.73	381	1487.73	6555	1487.73	1927
1488.7	169	1488.7	379	1488.7	6627	1488.7	1903
1489.66	166	1489.66	373	1489.66	6709	1489.66	1923
1490.63	177	1490.63	395	1490.63	6725	1490.63	1875
1491.59	176	1491.59	371	1491.59	6689	1491.59	1905
1492.55	167	1492.55	393	1492.55	6763	1492.55	1927
1493.51	165	1493.51	369	1493.51	6751	1493.51	1925
1494.48	173	1494.48	369	1494.48	6737	1494.48	1971
1495.44	161	1495.44	367	1495.44	6783	1495.44	1949
1496.4	173	1496.4	389	1496.4	6709	1496.4	1927
1497.37	172	1497.37	387	1497.37	6621	1497.37	2005
1498.33	170	1498.33	391	1498.33	6749	1498.33	1907
1499.29	174	1499.29	385	1499.29	6591	1499.29	1935
1500.25	175	1500.25	373	1500.25	6703	1500.25	1945
1501.22	173	1501.22	387	1501.22	6715	1501.22	1919
1502.18	182	1502.18	377	1502.18	6681	1502.18	1883
1503.14	174	1503.14	381	1503.14	6823	1503.14	1871
1504.1	171	1504.1	401	1504.1	6701	1504.1	1973
1505.06	181	1505.06	381	1505.06	6809	1505.06	1963
1506.03	170	1506.03	391	1506.03	6821	1506.03	1957
1506.99	175	1506.99	413	1506.99	6751	1506.99	1961
1507.95	174	1507.95	387	1507.95	6735	1507.95	1949
1508.91	172	1508.91	383	1508.91	6851	1508.91	1953
1509.87	176	1509.87	385	1509.87	6785	1509.87	1977
1510.83	187	1510.83	381	1510.83	6673	1510.83	1935
1511.79	189	1511.79	397	1511.79	6807	1511.79	1955
1512.75	193	1512.75	407	1512.75	6723	1512.75	1965
1513.71	188	1513.71	409	1513.71	6663	1513.71	1955
1514.67	169	1514.67	397	1514.67	6755	1514.67	1921
1515.63	186	1515.63	429	1515.63	6801	1515.63	1951
1516.6	188	1516.6	405	1516.6	6731	1516.6	1971
1517.56	192	1517.56	411	1517.56	6935	1517.56	1933
1518.52	191	1518.52	389	1518.52	6785	1518.52	1965
1519.48	199	1519.48	407	1519.48	6887	1519.48	1911
1520.44	196	1520.44	423	1520.44	6749	1520.44	1915
1521.4	197	1521.4	421	1521.4	6811	1521.4	1901
1522.36	203	1522.36	421	1522.36	6775	1522.36	1977
1523.32	194	1523.32	411	1523.32	6803	1523.32	1931
1524.27	198	1524.27	397	1524.27	6855	1524.27	2001
1525.23	207	1525.23	449	1525.23	6809	1525.23	1965
1526.19	215	1526.19	449	1526.19	6895	1526.19	1971
1527.15	190	1527.15	419	1527.15	6881	1527.15	1991
1528.11	214	1528.11	457	1528.11	6963	1528.11	1945
1529.07	215	1529.07	421	1529.07	6963	1529.07	2031
1530.03	227	1530.03	439	1530.03	6849	1530.03	2021
1530.99	226	1530.99	449	1530.99	6873	1530.99	1983
1531.95	236	1531.95	447	1531.95	6913	1531.95	1987
1532.9	244	1532.9	487	1532.9	6933	1532.9	1971
1533.86	235	1533.86	461	1533.86	7057	1533.86	1937
1534.82	233	1534.82	479	1534.82	7027	1534.82	1985
1535.78	243	1535.78	495	1535.78	7189	1535.78	1935
1536.74	241	1536.74	477	1536.74	6971	1536.74	1969
1537.7	271	1537.7	473	1537.7	6999	1537.7	1957
1538.65	257	1538.65	503	1538.65	7115	1538.65	1947
1539.61	261	1539.61	491	1539.61	6997	1539.61	1973
1540.57	264	1540.57	519	1540.57	7083	1540.57	1993
1541.52	279	1541.52	531	1541.52	7069	1541.52	1985
1542.48	279	1542.48	533	1542.48	7139	1542.48	1973
1543.44	305	1543.44	557	1543.44	7221	1543.44	1953
1544.4	295	1544.4	545	1544.4	7229	1544.4	1999
1545.35	314	1545.35	549	1545.35	7303	1545.35	1999
1546.31	318	1546.31	559	1546.31	7441	1546.31	1955
1547.27	336	1547.27	561	1547.27	7357	1547.27	1995
1548.22	346	1548.22	607	1548.22	7357	1548.22	1987
1549.18	363	1549.18	575	1549.18	7485	1549.18	1963
1550.14	370	1550.14	615	1550.14	7323	1550.14	1999
1551.09	372	1551.09	647	1551.09	7541	1551.09	1995
1552.05	383	1552.05	651	1552.05	7583	1552.05	1989
1553.01	401	1553.01	681	1553.01	7621	1553.01	1937
1553.96	424	1553.96	707	1553.96	7781	1553.96	1981
1554.92	453	1554.92	713	1554.92	7749	1554.92	1943
1555.87	466	1555.87	743	1555.87	7705	1555.87	1995
1556.83	512	1556.83	811	1556.83	7981	1556.83	1955
1557.78	529	1557.78	797	1557.78	8051	1557.78	1959
1558.74	573	1558.74	855	1558.74	8103	1558.74	1999
1559.7	605	1559.7	909	1559.7	8273	1559.7	1979
1560.65	621	1560.65	913	1560.65	8255	1560.65	1987
1561.61	703	1561.61	971	1561.61	8489	1561.61	2061
1562.56	732	1562.56	1007	1562.56	8599	1562.56	1999
1563.52	793	1563.52	1119	1563.52	8821	1563.52	1933
1564.47	861	1564.47	1179	1564.47	8897	1564.47	1929
1565.43	919	1565.43	1283	1565.43	8919	1565.43	1967
1566.38	995	1566.38	1389	1566.38	9177	1566.38	1935
1567.33	1086	1567.33	1481	1567.33	9455	1567.33	2037
1568.29	1186	1568.29	1591	1568.29	9575	1568.29	2011
1569.24	1302	1569.24	1771	1569.24	9867	1569.24	1981
1570.2	1429	1570.2	1915	1570.2	9939	1570.2	1997
1571.15	1565	1571.15	2181	1571.15	10357	1571.15	1921
1572.11	1680	1572.11	2419	1572.11	10521	1572.11	1925
1573.06	1858	1573.06	2673	1573.06	10839	1573.06	1981
1574.01	2038	1574.01	2931	1574.01	10967	1574.01	2009
1574.97	2154	1574.97	3165	1574.97	11355	1574.97	2017
1575.92	2368	1575.92	3475	1575.92	11429	1575.92	1985
1576.87	2534	1576.87	3731	1576.87	11785	1576.87	1999
1577.83	2718	1577.83	3969	1577.83	11989	1577.83	1975
1578.78	2841	1578.78	4191	1578.78	12061	1578.78	1969
1579.73	2974	1579.73	4211	1579.73	12325	1579.73	1997
1580.69	2968	1580.69	4375	1580.69	12517	1580.69	1971
1581.64	2975	1581.64	4347	1581.64	12685	1581.64	1955
1582.59	2905	1582.59	4367	1582.59	12997	1582.59	1981
1583.54	2788	1583.54	4287	1583.54	13191	1583.54	1961
1584.5	2675	1584.5	4327	1584.5	13545	1584.5	2033
1585.45	2544	1585.45	4249	1585.45	13519	1585.45	1969
1586.4	2353	1586.4	4231	1586.4	13821	1586.4	2009
1587.35	2169	1587.35	4145	1587.35	13831	1587.35	2023
1588.3	2014	1588.3	4137	1588.3	14391	1588.3	1991
1589.26	1864	1589.26	4049	1589.26	14537	1589.26	1989
1590.21	1724	1590.21	3965	1590.21	14399	1590.21	1957
1591.16	1528	1591.16	3881	1591.16	14455	1591.16	1949
1592.11	1441	1592.11	3789	1592.11	14739	1592.11	2003
1593.06	1335	1593.06	3681	1593.06	14793	1593.06	1925
1594.01	1194	1594.01	3433	1594.01	14875	1594.01	2013
1594.97	1116	1594.97	3205	1594.97	14873	1594.97	1947
1595.92	1026	1595.92	2893	1595.92	14761	1595.92	1957
1596.87	941	1596.87	2715	1596.87	14719	1596.87	1955
1597.82	907	1597.82	2497	1597.82	14637	1597.82	1999
1598.77	846	1598.77	2291	1598.77	14445	1598.77	1963
1599.72	774	1599.72	2061	1599.72	14275	1599.72	2001
1600.67	747	1600.67	1923	1600.67	14457	1600.67	2013
1601.62	681	1601.62	1783	1601.62	13973	1601.62	1939
1602.57	654	1602.57	1619	1602.57	14175	1602.57	2035
1603.52	593	1603.52	1499	1603.52	13857	1603.52	1969
1604.47	570	1604.47	1351	1604.47	13645	1604.47	1955
1605.42	539	1605.42	1259	1605.42	13539	1605.42	1965
1606.37	517	1606.37	1171	1606.37	13273	1606.37	1855
1607.32	495	1607.32	1135	1607.32	13175	1607.32	1995
1608.27	502	1608.27	1053	1608.27	12805	1608.27	1921
1609.22	454	1609.22	1017	1609.22	12737	1609.22	1973
1610.17	443	1610.17	919	1610.17	12389	1610.17	2017
1611.12	433	1611.12	907	1611.12	12229	1611.12	1957
1612.07	409	1612.07	885	1612.07	11825	1612.07	2025
1613.02	390	1613.02	835	1613.02	11739	1613.02	1947
1613.97	398	1613.97	783	1613.97	11409	1613.97	1957
1614.92	395	1614.92	763	1614.92	11097	1614.92	1951
1615.86	374	1615.86	737	1615.86	11003	1615.86	1965
1616.81	368	1616.81	747	1616.81	10803	1616.81	1961
1617.76	376	1617.76	699	1617.76	10687	1617.76	2031
1618.71	338	1618.71	665	1618.71	10495	1618.71	1979
1619.66	353	1619.66	673	1619.66	10267	1619.66	1951
1620.61	333	1620.61	635	1620.61	10099	1620.61	1911
1621.56	337	1621.56	595	1621.56	10037	1621.56	1963
1622.5	350	1622.5	593	1622.5	9979	1622.5	1995
1623.45	316	1623.45	581	1623.45	9833	1623.45	1935
1624.4	316	1624.4	587	1624.4	9641	1624.4	1947
1625.35	294	1625.35	565	1625.35	9499	1625.35	1917
1626.3	291	1626.3	539	1626.3	9445	1626.3	1943
1627.24	289	1627.24	537	1627.24	9489	1627.24	1943
1628.19	279	1628.19	517	1628.19	9305	1628.19	1923
1629.14	278	1629.14	503	1629.14	9203	1629.14	1927
1630.08	260	1630.08	461	1630.08	8937	1630.08	1919
1631.03	250	1631.03	503	1631.03	8841	1631.03	1993
1631.98	242	1631.98	443	1631.98	8855	1631.98	2023
1632.93	236	1632.93	461	1632.93	8727	1632.93	1933
1633.87	227	1633.87	439	1633.87	8661	1633.87	1939
1634.82	216	1634.82	481	1634.82	8673	1634.82	2013
1635.77	209	1635.77	421	1635.77	8599	1635.77	1949
1636.71	198	1636.71	455	1636.71	8561	1636.71	1923
1637.66	207	1637.66	439	1637.66	8523	1637.66	1945
1638.6	198	1638.6	425	1638.6	8325	1638.6	1947
1639.55	195	1639.55	411	1639.55	8461	1639.55	1903
1640.5	171	1640.5	413	1640.5	8429	1640.5	1955
1641.44	193	1641.44	415	1641.44	8263	1641.44	1971
1642.39	165	1642.39	403	1642.39	8271	1642.39	1951
1643.33	172	1643.33	421	1643.33	8247	1643.33	1957
1644.28	181	1644.28	385	1644.28	8141	1644.28	1945
1645.22	172	1645.22	391	1645.22	8231	1645.22	1913
1646.17	164	1646.17	363	1646.17	8087	1646.17	1961
1647.11	172	1647.11	397	1647.11	8063	1647.11	1875
1648.06	160	1648.06	375	1648.06	8033	1648.06	1885
1649.01	165	1649.01	389	1649.01	8011	1649.01	1901
1649.95	156	1649.95	391	1649.95	8057	1649.95	1897
1650.9	160	1650.9	359	1650.9	7977	1650.9	1985
1651.84	168	1651.84	405	1651.84	7937	1651.84	1941
1652.78	165	1652.78	403	1652.78	7845	1652.78	1939
1653.73	163	1653.73	387	1653.73	7917	1653.73	1891
1654.67	156	1654.67	395	1654.67	7845	1654.67	1913
1655.62	145	1655.62	379	1655.62	7845	1655.62	1921
1656.56	155	1656.56	383	1656.56	7801	1656.56	1915
1657.51	146	1657.51	389	1657.51	7853	1657.51	1895
1658.45	147	1658.45	393	1658.45	7713	1658.45	1969
1659.39	142	1659.39	379	1659.39	7713	1659.39	1907
1660.34	130	1660.34	359	1660.34	7713	1660.34	1929
1661.28	152	1661.28	387	1661.28	7693	1661.28	1979
1662.22	146	1662.22	335	1662.22	7775	1662.22	1951
1663.17	139	1663.17	359	1663.17	7655	1663.17	1929
1664.11	140	1664.11	371	1664.11	7669	1664.11	1959
1665.05	126	1665.05	369	1665.05	7759	1665.05	2011
1666	137	1666	385	1666	7611	1666	1945
1666.94	140	1666.94	353	1666.94	7577	1666.94	1977
1667.88	131	1667.88	347	1667.88	7717	1667.88	1903
1668.82	145	1668.82	355	1668.82	7707	1668.82	1945
1669.77	139	1669.77	363	1669.77	7611	1669.77	1927
1670.71	128	1670.71	349	1670.71	7497	1670.71	1949
1671.65	119	1671.65	359	1671.65	7589	1671.65	1955
1672.59	127	1672.59	359	1672.59	7621	1672.59	1887
1673.54	133	1673.54	379	1673.54	7683	1673.54	1905
1674.48	140	1674.48	365	1674.48	7599	1674.48	1933
1675.42	133	1675.42	379	1675.42	7363	1675.42	1941
1676.36	128	1676.36	357	1676.36	7535	1676.36	1913
1677.3	129	1677.3	355	1677.3	7487	1677.3	1887
1678.25	118	1678.25	349	1678.25	7563	1678.25	1933
1679.19	133	1679.19	339	1679.19	7479	1679.19	1927
1680.13	130	1680.13	339	1680.13	7455	1680.13	1865
1681.07	117	1681.07	365	1681.07	7309	1681.07	1945
1682.01	131	1682.01	349	1682.01	7439	1682.01	1883
1682.95	125	1682.95	373	1682.95	7431	1682.95	1875
1683.89	134	1683.89	365	1683.89	7345	1683.89	1967
1684.83	115	1684.83	359	1684.83	7525	1684.83	1951
1685.77	125	1685.77	353	1685.77	7403	1685.77	1921
1686.71	136	1686.71	359	1686.71	7375	1686.71	1975
1687.66	122	1687.66	373	1687.66	7375	1687.66	1961
1688.6	121	1688.6	395	1688.6	7373	1688.6	1873
1689.54	116	1689.54	357	1689.54	7333	1689.54	1949
1690.48	119	1690.48	355	1690.48	7371	1690.48	1923
1691.42	123	1691.42	343	1691.42	7357	1691.42	1873
1692.36	110	1692.36	339	1692.36	7245	1692.36	1883
1693.3	115	1693.3	391	1693.3	7271	1693.3	1949
1694.24	120	1694.24	337	1694.24	7433	1694.24	1933
1695.17	114	1695.17	335	1695.17	7437	1695.17	1897
1696.12	118	1696.12	337	1696.12	7367	1696.12	1911
1697.05	117	1697.05	365	1697.05	7353	1697.05	1971
1697.99	114	1697.99	349	1697.99	7217	1697.99	1937
1698.93	111	1698.93	355	1698.93	7351	1698.93	1907
1699.87	114	1699.87	343	1699.87	7357	1699.87	1921
1700.81	119	1700.81	345	1700.81	7287	1700.81	1925

## Sheet: 2d
Gr		30preGr
0	2.5191	0	0.3702
0	2.5002	0.1	0.365
0	2.4885	0.4	0.3599
0	2.4783	0.7	0.3548
0	2.467	1.1	0.3497
0	2.4561	1.5	0.3446
0	2.4451	1.9	0.3395
0	2.4355	2.3	0.3344
0	2.4248	2.7	0.3292
0	2.4154	3.1	0.3241
0	2.4059	3.5	0.319
0	2.3958	4	0.3139
0	2.3845	4.5	0.3088
0	2.3748	4.9	0.3037
0	2.3659	5.4	0.2985
0	2.3563	5.9	0.2934
0	2.3469	6.4	0.2883
0	2.3385	6.9	0.2832
0	2.3293	7.4	0.2781
0	2.3213	8	0.273
0	2.3121	8.5	0.2679
0.1	2.3033	9.1	0.2627
0.1	2.2955	9.7	0.2576
0.1	2.2878	10.2	0.2525
0.1	2.2794	10.8	0.2474
0.1	2.272	11.5	0.2423
0.1	2.2638	12.1	0.2372
0.1	2.2562	12.8	0.2322
0.1	2.2484	13.4	0.2274
0.1	2.241	14.1	0.2226
0.1	2.2331	14.7	0.2183
0.1	2.2253	15.4	0.2139
0.1	2.2183	16	0.2099
0.1	2.2108	16.7	0.206
0.1	2.2039	17.3	0.2024
0.1	2.1966	18	0.1995
0.1	2.1898	18.6	0.1969
0.1	2.1825	19.3	0.195
0.1	2.176	19.9	0.1935
0.1	2.1697	20.6	0.1924
0.1	2.1624	21.2	0.1914
0.1	2.1562	21.9	0.1905
0.1	2.1494	22.5	0.1899
0.1	2.1424	23.2	0.1891
0.1	2.1365	23.8	0.1883
0.1	2.1295	24.5	0.1877
0.1	2.1238	25.1	0.1869
0.1	2.117	25.8	0.1863
0.1	2.1112	26.4	0.1855
0.1	2.1053	27.1	0.1849
0.1	2.0991	27.7	0.1842
0.2	2.0928	28.4	0.1832
0.2	2.0874	29	0.1823
0.2	2.081	29.7	0.1815
0.2	2.0756	30.3	0.1806
0.2	2.07	31	0.1795
0.2	2.064	31.6	0.1786
0.2	2.0587	32.3	0.1776
0.2	2.0528	32.9	0.1767
0.2	2.0471	33.6	0.1756
0.2	2.0419	34.2	0.1747
0.2	2.0368	34.9	0.1736
0.2	2.0311	35.5	0.1724
0.2	2.0255	36.2	0.1713
0.2	2.0199	36.8	0.17
0.2	2.0102	37.4	0.169
0.2	2.0047	38.1	0.1679
0.2	1.9996	38.8	0.1666
0.2	1.9902	39.4	0.1654
0.2	1.9847	40	0.1643
0.2	1.9751	40.7	0.1631
0.2	1.966	41.4	0.162
0.2	1.9609	42	0.1607
0.2	1.9517	42.6	0.1595
0.2	1.9426	43.3	0.1583
0.2	1.9344	43.9	0.157
0.2	1.9258	44.6	0.1558
0.2	1.9169	45.2	0.1544
0.3	1.9085	45.9	0.1533
0.3	1.9004	46.5	0.1521
0.3	1.8924	47.2	0.151
0.3	1.8848	47.8	0.1497
0.3	1.877	48.5	0.1487
0.3	1.8696	49.1	0.1474
0.3	1.8621	49.8	0.1463
0.3	1.8541	50.4	0.1451
0.3	1.8469	51.1	0.144
0.3	1.8404	51.7	0.1429
0.3	1.8336	52.4	0.1418
0.3	1.8268	53	0.1409
0.3	1.8206	53.7	0.1398
0.3	1.8142	54.3	0.1389
0.3	1.8079	55	0.138
0.3	1.8017	55.6	0.1369
0.4	1.7958	56.3	0.1359
0.4	1.7899	56.9	0.1349
0.4	1.7842	57.5	0.1341
0.4	1.7784	58.2	0.1332
0.4	1.7705	58.9	0.1324
0.4	1.7651	59.5	0.1314
0.4	1.7598	60.1	0.1305
0.4	1.7546	60.8	0.1297
0.4	1.7473	61.5	0.1288
0.4	1.7401	62.1	0.1277
0.4	1.7333	62.7	0.127
0.4	1.7267	63.4	0.126
0.4	1.7208	64.1	0.1252
0.4	1.7146	64.7	0.1245
0.5	1.7085	65.3	0.1235
0.5	1.7029	66	0.1226
0.5	1.6975	66.7	0.1218
0.5	1.6924	67.3	0.1209
0.5	1.6871	67.9	0.1201
0.5	1.682	68.6	0.1194
0.5	1.676	69.2	0.1186
0.5	1.6698	69.9	0.118
0.5	1.6637	70.5	0.1172
0.6	1.6581	71.2	0.1164
0.6	1.6526	71.8	0.1156
0.6	1.6474	72.5	0.115
0.6	1.6422	73.1	0.1144
0.6	1.6369	73.8	0.1138
0.6	1.6309	74.4	0.1132
0.6	1.6251	75.1	0.1125
0.6	1.6192	75.7	0.1121
0.7	1.6137	76.4	0.1113
0.7	1.6085	77	0.1108
0.7	1.6033	77.7	0.1104
0.7	1.5974	78.3	0.1099
0.7	1.5915	79	0.1096
0.7	1.5861	79.6	0.1091
0.8	1.5806	80.3	0.1085
0.8	1.5755	80.9	0.1082
0.8	1.5698	81.6	0.1077
0.8	1.5644	82.2	0.1074
0.8	1.5592	82.9	0.107
0.9	1.5535	83.5	0.1066
0.9	1.5481	84.2	0.1063
0.9	1.5428	84.8	0.106
0.9	1.5372	85.5	0.1057
1	1.5318	86.1	0.1054
1	1.5267	86.8	0.1051
1	1.5213	87.4	0.1049
1	1.5158	88.1	0.1046
1.1	1.5107	88.7	0.1045
1.1	1.5051	89.4	0.1042
1.1	1.4999	90	0.104
1.2	1.4946	90.7	0.1037
1.2	1.4892	91.3	0.1035
1.2	1.4839	92	0.1034
1.3	1.4785	92.6	0.1032
1.3	1.4734	93.3	0.1031
1.3	1.4679	93.9	0.1029
1.4	1.4628	94.5	0.1028
1.4	1.4574	95.2	0.1026
1.4	1.4523	95.9	0.1025
1.5	1.4467	96.5	0.1025
1.5	1.4416	97.1	0.1023
1.5	1.4363	97.8	0.1022
1.6	1.4312	98.5	0.102
1.6	1.4261	99.1	0.1018
1.6	1.4208	99.7	0.1018
1.6	1.4157	100.4	0.1017
1.7	1.4101	101.1	0.1015
1.7	1.4047	101.7	0.1014
1.8	1.3993	102.3	0.1012
1.8	1.3942	103	0.1012
1.8	1.389	103.7	0.1011
1.9	1.3838	104.3	0.1011
1.9	1.3787	104.9	0.1009
1.9	1.3734	105.6	0.1008
2	1.3681	106.3	0.1006
2	1.363	106.9	0.1006
2	1.3576	107.5	0.1004
2.1	1.3525	108.2	0.1003
2.1	1.3473	108.8	0.1003
2.2	1.3421	109.5	0.1003
2.2	1.337	110.1	0.1
2.2	1.3317	110.8	0.0998
2.3	1.3266	111.4	0.0998
2.4	1.3211	112.1	0.0997
2.4	1.316	112.7	0.0997
2.4	1.3109	113.4	0.0995
2.5	1.3058	114	0.0995
2.6	1.3007	114.7	0.0994
2.6	1.2956	115.3	0.0992
2.7	1.2905	116	0.0992
2.8	1.2853	116.6	0.0991
2.8	1.2802	117.3	0.0991
2.9	1.2751	117.9	0.0987
3	1.27	118.6	0.0987
3.1	1.2649	119.2	0.0986
3.2	1.2598	119.9	0.0984
3.3	1.2547	120.5	0.0983
3.4	1.2495	121.2	0.0983
3.5	1.2444	121.8	0.0981
3.6	1.2393	122.4	0.098
3.7	1.2342	123.1	0.0978
3.8	1.2291	123.8	0.0978
4	1.224	124.4	0.0977
4.1	1.2188	125	0.0977
4.2	1.2137	125.7	0.0975
4.4	1.2086	126.4	0.0975
4.5	1.2035	127	0.0973
4.7	1.1984	127.6	0.0972
4.8	1.1933	128.3	0.0969
5	1.1882	129	0.0969
5.2	1.183	129.6	0.0967
5.4	1.1779	130.2	0.0967
5.6	1.1728	130.9	0.0966
5.8	1.1677	131.6	0.0964
6	1.1626	132.2	0.0963
6.2	1.1575	132.8	0.0961
6.4	1.1523	133.5	0.096
6.6	1.1472	134.2	0.0958
6.9	1.1421	134.8	0.0958
7.1	1.137	135.4	0.0956
7.3	1.1319	136.1	0.0953
7.6	1.1268	136.8	0.0952
7.8	1.1217	137.4	0.0952
8.1	1.1165	138	0.0952
8.3	1.1114	138.7	0.095
8.6	1.1063	139.3	0.0947
8.8	1.1012	140	0.0946
9.1	1.0961	140.6	0.0944
9.4	1.091	141.3	0.0942
9.6	1.0858	141.9	0.0941
9.9	1.0807	142.6	0.0941
10.2	1.0756	143.2	0.0939
10.5	1.0705	143.9	0.0938
10.7	1.0654	144.5	0.0936
11	1.0603	145.2	0.0935
11.3	1.0552	145.8	0.0933
11.6	1.05	146.5	0.0932
11.9	1.0449	147.1	0.0932
12.1	1.0398	147.8	0.0929
12.4	1.0347	148.4	0.0927
12.7	1.0296	149.1	0.0924
12.9	1.0245	149.7	0.0922
13.2	1.0193	150.4	0.0921
13.5	1.0142	151	0.0919
13.7	1.0091	151.7	0.0918
14	1.004	152.3	0.0916
14.2	0.9989	153	0.0913
14.5	0.9938	153.6	0.0911
14.7	0.9887	154.3	0.091
14.9	0.9835	154.9	0.0908
15.1	0.9784	155.6	0.0907
15.3	0.9733	156.2	0.0904
15.5	0.9682	156.9	0.0901
15.7	0.9631	157.5	0.0899
15.9	0.958	158.2	0.0896
16.1	0.9528	158.8	0.0894
16.3	0.9477	159.5	0.0893
16.5	0.9426	160.1	0.0891
16.7	0.9375	160.8	0.0888
16.9	0.9324	161.4	0.0885
17.1	0.9273	162.1	0.0884
17.3	0.9222	162.7	0.0882
17.5	0.917	163.4	0.0879
17.7	0.9119	164	0.0876
17.9	0.9068	164.7	0.0874
18	0.9017	165.3	0.0871
18.2	0.8966	166	0.0868
18.4	0.8915	166.6	0.0867
18.6	0.8863	167.3	0.0863
18.8	0.8812	167.9	0.0862
19	0.8761	168.6	0.0857
19.2	0.871	169.2	0.0856
19.4	0.8659	169.9	0.0851
19.6	0.8608	170.5	0.0849
19.8	0.8557	171.2	0.0846
20	0.8505	171.8	0.0845
20.2	0.8454	172.5	0.084
20.4	0.8403	173.1	0.0837
20.6	0.8352	173.8	0.0834
20.8	0.8301	174.4	0.0831
21	0.825	175.1	0.0828
21.2	0.8198	175.7	0.0826
21.4	0.8147	176.4	0.0822
21.6	0.8096	177	0.0818
21.8	0.8045	177.7	0.0815
22	0.7994	178.3	0.0812
22.3	0.7943	179	0.0809
22.5	0.7892	179.6	0.0805
22.7	0.784	180.2	0.0803
23	0.7789	180.9	0.0798
23.2	0.7738	181.6	0.0795
23.4	0.7687	182.2	0.0791
23.7	0.7636	182.8	0.0787
23.9	0.7585	183.5	0.0784
24.2	0.7533	184.2	0.0781
24.5	0.7482	184.8	0.0778
24.7	0.7431	185.4	0.0773
25	0.738	186.1	0.077
25.2	0.7329	186.8	0.0767
25.5	0.7278	187.4	0.0763
25.8	0.7227	188	0.0761
26	0.7175	188.7	0.0756
26.3	0.7124	189.3	0.0753
26.6	0.7073	190	0.075
26.9	0.7022	190.6	0.0747
27.2	0.6971	191.3	0.0744
27.4	0.692	191.9	0.0742
27.7	0.6868	192.6	0.0738
28	0.6817	193.2	0.0736
28.3	0.6766	193.9	0.0733
28.6	0.6715	194.5	0.073
28.9	0.6664	195.2	0.0727
29.2	0.6613	195.8	0.0725
29.5	0.6562	196.5	0.0722
29.8	0.651	197.1	0.0719
30	0.6459	197.8	0.0718
30.4	0.6408	198.4	0.0715
30.6	0.6357	199.1	0.0713
31	0.6306	199.7	0.0711
31.2	0.6255	200.4	0.071
31.6	0.6203	201	0.0708
31.9	0.6152	201.7	0.0705
32.2	0.6101	202.3	0.0702
32.5	0.605	203	0.0701
32.8	0.5999	203.6	0.0701
33.1	0.5948	204.3	0.0699
33.4	0.5897	204.9	0.0698
33.7	0.5845	205.6	0.0696
34	0.5794	206.2	0.0694
34.3	0.5743	206.9	0.0693
34.6	0.5692	207.5	0.0693
35	0.5641	208.2	0.0691
35.3	0.559	208.8	0.069
35.6	0.5539	209.5	0.0688
36	0.5487	210.1	0.0688
36.3	0.5436	210.7	0.0688
36.6	0.5385	211.4	0.0687
37	0.5334	212.1	0.0687
37.3	0.5283	212.7	0.0685
37.6	0.5232	213.3	0.0684
38	0.518	214	0.0684
38.3	0.5129	214.7	0.0684
38.7	0.5078	215.3	0.0682
39.1	0.5027	215.9	0.068
39.4	0.4976	216.6	0.068
39.8	0.4925	217.3	0.068
40.2	0.4874	217.9	0.068
40.6	0.4822	218.5	0.0677
40.9	0.4771	219.2	0.0677
41.3	0.472	219.9	0.0676
41.7	0.4669	220.5	0.0676
42.1	0.4618	221.1	0.0676
42.5	0.4567	221.8	0.0676
42.9	0.4515	222.4	0.0674
43.3	0.4464	223.1	0.0674
43.8	0.4413	223.7	0.0673
44.2	0.4362	224.4	0.0673
44.6	0.4311	225	0.0673
45.1	0.426	225.7	0.0673
45.5	0.4209	226.3	0.0671
46	0.4157	227	0.0671
46.5	0.4106	227.6	0.067
46.9	0.4055	228.3	0.067
47.4	0.4004	228.9	0.067
47.9	0.3953	229.6	0.067
48.4	0.3902	230.2	0.0668
48.9	0.385	230.9	0.0667
49.4	0.3799	231.5	0.0667
49.9	0.3748	232.2	0.0667
50.5	0.3697	232.8	0.0667
51	0.3646	233.5	0.0667
51.6	0.3595	234.1	0.0667
52.2	0.3544	234.8	0.0663
52.7	0.3492	235.4	0.0663
53.3	0.3441	236.1	0.0663
53.9	0.339	236.7	0.0662
54.5	0.334	237.4	0.0663
55.2	0.3291	238	0.0662
55.8	0.324	238.7	0.066
56.4	0.3192	239.3	0.066
57	0.3144	240	0.0659
57.6	0.3099	240.6	0.0659
58.2	0.3052	241.3	0.0659
58.8	0.3007	241.9	0.0657
59.5	0.2962	242.6	0.0657
60.1	0.2917	243.2	0.0657
60.7	0.2875	243.9	0.0656
61.3	0.2832	244.5	0.0654
61.9	0.2789	245.2	0.0654
62.6	0.2747	245.8	0.0654
63.2	0.2703	246.5	0.0654
63.8	0.2662	247.1	0.0653
64.4	0.262	247.8	0.0651
65	0.2579	248.4	0.0651
65.6	0.2538	249	0.0649
66.3	0.2497	249.7	0.0649
66.9	0.2457	250.4	0.0649
67.5	0.2417	251	0.0648
68.1	0.2378	251.6	0.0648
68.7	0.2341	252.3	0.0646
69.4	0.2302	252.9	0.0645
70	0.2265	253.6	0.0645
70.6	0.2229	254.2	0.0645
71.2	0.2192	254.9	0.0645
71.8	0.2158	255.5	0.0643
72.4	0.2124	256.2	0.0642
73.1	0.2091	256.8	0.064
73.7	0.2059	257.5	0.064
74.3	0.2029	258.1	0.064
74.9	0.1998	258.8	0.0639
75.5	0.197	259.4	0.0639
76.1	0.1945	260.1	0.0637
76.7	0.1925	260.7	0.0636
77.4	0.1907	261.4	0.0636
78	0.1893	262	0.0634
78.6	0.1879	262.7	0.0632
79.2	0.1869	263.3	0.0632
79.8	0.1865	264	0.0631
80.5	0.1859	264.6	0.0631
81.1	0.1852	265.3	0.0629
81.7	0.1848	265.9	0.0628
82.3	0.1843	266.6	0.0626
82.9	0.1838	267.2	0.0626
83.5	0.1834	267.9	0.0626
84.2	0.1829	268.5	0.0625
84.8	0.1826	269.2	0.0623
85.4	0.1821	269.8	0.0622
86	0.1818	270.5	0.062
86.6	0.1814	271.1	0.0618
87.3	0.1809	271.8	0.0618
87.9	0.1804	272.4	0.0617
88.5	0.18	273.1	0.0615
89.1	0.1797	273.7	0.0614
89.7	0.179	274.4	0.0612
90.3	0.1786	275	0.0612
91	0.1781	275.7	0.0611
91.6	0.1775	276.3	0.0609
92.2	0.177	277	0.0608
92.8	0.1764	277.6	0.0608
93.4	0.1759	278.3	0.0606
94	0.1753	278.9	0.0605
94.7	0.1747	279.6	0.0601
95.3	0.1741	280.2	0.0601
95.9	0.1733	280.9	0.0598
96.5	0.1727	281.5	0.0598
97.1	0.1719	282.2	0.0597
97.8	0.1713	282.8	0.0594
98.4	0.1705	283.5	0.0594
99	0.1696	284.1	0.0591
99.6	0.1688	284.8	0.0589
100.2	0.168	285.4	0.0587
100.8	0.1671	286.1	0.0586
101.5	0.1663	286.7	0.0584
102.1	0.1654	287.4	0.0583
102.7	0.1645	288	0.0581
103.3	0.1635	288.7	0.058
103.9	0.1626	289.3	0.0577
104.6	0.1617	290	0.0574
105.2	0.1607	290.6	0.0572
105.8	0.1597	291.2	0.057
106.4	0.1587	291.9	0.0569
107	0.1576	292.6	0.0567
107.6	0.1566	293.2	0.0566
108.2	0.1555	293.8	0.0561
108.9	0.1545	294.5	0.056
109.5	0.1535	295.2	0.0556
110.1	0.1524	295.8	0.0555
110.7	0.1513	296.4	0.0553
111.3	0.1502	297.1	0.055
111.9	0.1491	297.8	0.0547
112.6	0.148	298.4	0.0544
113.2	0.1469	299	0.0543
113.8	0.1459	299.7	0.0539
114.4	0.1448	300.4	0.0536
115	0.1437	301	0.0533
115.7	0.1426	301.6	0.0532
116.3	0.1417	302.3	0.0527
116.9	0.1406	302.9	0.0524
117.5	0.1395	303.6	0.0521
118.1	0.1386	304.2	0.0518
118.7	0.1375	304.9	0.0515
119.4	0.1366	305.5	0.0512
120	0.1358	306.2	0.0508
120.6	0.1349	306.8	0.0504
121.2	0.1341	307.5	0.0499
121.8	0.1332	308.1	0.0496
122.5	0.1322	308.8	0.0491
123.1	0.1314	309.4	0.0488
123.7	0.1305	310.1	0.0484
124.3	0.1297	310.7	0.0482
124.9	0.129	311.4	0.0476
125.5	0.128	312	0.0471
126.1	0.1273	312.7	0.0467
126.8	0.1265	313.3	0.0462
127.4	0.1257	314	0.0457
128	0.1249	314.6	0.0453
128.6	0.1242	315.3	0.0448
129.2	0.1234	315.9	0.0443
129.8	0.1226	316.6	0.0439
130.5	0.1218	317.2	0.0432
131.1	0.1209	317.9	0.0428
131.7	0.1203	318.5	0.0422
132.3	0.1194	319.2	0.0415
132.9	0.1186	319.8	0.0409
133.6	0.1178	320.5	0.0405
134.2	0.117	321.1	0.0398
134.8	0.1163	321.8	0.0391
135.4	0.1155	322.4	0.0383
136	0.1147	323.1	0.0377
136.6	0.1141	323.7	0.0369
137.3	0.1133	324.3	0.0363
137.9	0.1127	325	0.0353
138.5	0.1121	325.7	0.0347
139.1	0.1115	326.3	0.0338
139.7	0.111	326.9	0.0329
140.4	0.1104	327.6	0.0321
141	0.1099	328.3	0.0312
141.6	0.1094	328.9	0.0302
142.2	0.109	329.5	0.0295
142.8	0.1085	330.2	0.0285
143.4	0.108	330.9	0.0274
144.1	0.1076	331.5	0.0264
144.7	0.1073	332.1	0.0253
145.3	0.1068	332.8	0.0243
145.9	0.1065	333.5	0.0233
146.5	0.106	334.1	0.0222
147.1	0.1057	334.7	0.0211
147.7	0.1053	335.4	0.02
148.4	0.1049	336.1	0.0189
149	0.1046	336.7	0.0177
149.6	0.1043	337.3	0.0164
150.2	0.104	338	0.0152
150.9	0.1037	338.7	0.0141
151.5	0.1034	339.3	0.0129
152.1	0.1032	339.9	0.0116
152.7	0.1028	340.6	0.0104
153.3	0.1028	341.3	0.009
153.9	0.1025	341.9	0.0078
154.6	0.1022	342.5	0.0065
155.2	0.102	343.2	0.0053
155.8	0.1018	343.3	0.005
156.4	0.1015	0	--
157	0.1015	0.1	0.0243
157.6	0.1012	0.4	0.0346
158.2	0.1012	1	0.0389
158.9	0.1009	1.6	0.0425
159.5	0.1009	2.3	0.0454
160.1	0.1008	3	0.0484
160.7	0.1006	3.6	0.0512
161.3	0.1004	4.2	0.0539
162	0.1004	4.9	0.0563
162.6	0.1004	5.6	0.0587
163.2	0.1003	6.2	0.0611
163.8	0.1001	6.8	0.0632
164.4	0.1001	7.5	0.0654
165	0.1	8.2	0.0674
165.7	0.1	8.8	0.0691
166.3	0.0998	9.4	0.071
166.9	0.0998	10.1	0.0725
167.5	0.0997	10.7	0.0741
168.2	0.0997	11.4	0.0756
168.8	0.0995	12	0.077
169.4	0.0995	12.7	0.0784
170	0.0995	13.3	0.0797
170.6	0.0994	14	0.0809
171.2	0.0994	14.6	0.082
171.8	0.0994	15.3	0.0828
172.5	0.0992	15.9	0.0839
173.1	0.0991	16.6	0.0848
173.7	0.0991	17.2	0.0856
174.3	0.0991	17.9	0.0865
174.9	0.0991	18.5	0.0871
175.5	0.0991	19.2	0.0877
176.2	0.0989	19.8	0.0884
176.8	0.0987	20.5	0.089
177.4	0.0989	21.1	0.0896
178	0.0987	21.8	0.0902
178.6	0.0987	22.4	0.0905
179.3	0.0986	23.1	0.091
179.9	0.0986	23.7	0.0915
180.5	0.0984	24.4	0.0918
181.1	0.0984	25	0.0922
181.7	0.0984	25.7	0.0924
182.3	0.0984	26.3	0.0927
183	0.0983	27	0.0932
183.6	0.0981	27.6	0.0933
184.2	0.0981	28.3	0.0938
184.8	0.0981	28.9	0.0938
185.4	0.0981	29.6	0.0941
186.1	0.098	30.2	0.0942
186.7	0.098	30.9	0.0944
187.3	0.0978	31.5	0.0947
187.9	0.0978	32.2	0.0949
188.5	0.0978	32.8	0.095
189.1	0.0977	33.5	0.0952
189.8	0.0977	34.1	0.0955
190.4	0.0975	34.8	0.0956
191	0.0975	35.4	0.0958
191.6	0.0975	36.1	0.0958
192.2	0.0973	36.7	0.0961
192.8	0.0972	37.4	0.0961
193.4	0.0972	38	0.0963
194.1	0.097	38.7	0.0964
194.7	0.097	39.3	0.0966
195.3	0.0969	39.9	0.0967
195.9	0.0969	40.6	0.0967
196.6	0.0967	41.3	0.0969
197.2	0.0967	41.9	0.097
197.8	0.0966	42.5	0.0972
198.4	0.0966	43.2	0.0972
199	0.0964	43.9	0.0973
199.6	0.0963	44.5	0.0973
200.2	0.0963	45.1	0.0977
200.9	0.0961	45.8	0.0978
201.5	0.0961	46.4	0.0978
202.1	0.096	47.1	0.0978
202.7	0.0958	47.7	0.0978
203.4	0.0958	48.4	0.098
204	0.0956	49	0.0981
204.6	0.0955	49.7	0.0983
205.2	0.0955	50.3	0.0983
205.8	0.0953	51	0.0984
206.4	0.0953	51.6	0.0986
207	0.0952	52.3	0.0986
207.7	0.095	52.9	0.0987
208.3	0.0949	53.6	0.0987
208.9	0.0947	54.2	0.0989
209.5	0.0947	54.9	0.0989
210.1	0.0946	55.5	0.0989
210.7	0.0944	56.2	0.0992
211.4	0.0944	56.8	0.0992
212	0.0941	57.5	0.0994
212.6	0.0941	58.1	0.0994
213.2	0.0938	58.8	0.0995
213.8	0.0938	59.4	0.0995
214.5	0.0936	60.1	0.0997
215.1	0.0933	60.7	0.0998
215.7	0.0933	61.4	0.1
216.3	0.093	62	0.1001
216.9	0.093	62.7	0.1001
217.5	0.0929	63.3	0.1003
218.2	0.0925	64	0.1003
218.8	0.0924	64.6	0.1004
219.4	0.0922	65.3	0.1006
220	0.0921	65.9	0.1006
220.6	0.0919	66.6	0.1008
221.3	0.0916	67.2	0.1009
221.9	0.0915	67.9	0.1011
222.5	0.0913	68.5	0.1011
223.1	0.091	69.2	0.1011
223.7	0.0908	69.8	0.1012
224.3	0.0905	70.5	0.1014
225	0.0904	71.1	0.1015
225.6	0.0901	71.8	0.1015
226.2	0.0899	72.4	0.1017
226.8	0.0896	73.1	0.1018
227.4	0.0893	73.7	0.1018
228	0.0891	74.4	0.102
228.7	0.0888	75	0.1022
229.3	0.0885	75.7	0.1023
229.9	0.0882	76.3	0.1023
230.5	0.088	77	0.1025
231.1	0.0877	77.6	0.1026
231.7	0.0874	78.3	0.1028
232.4	0.0871	78.9	0.1028
233	0.0868	79.6	0.1029
233.6	0.0865	80.2	0.1031
234.2	0.0862	80.9	0.1032
234.8	0.0859	81.5	0.1034
235.4	0.0856	82.2	0.1034
236.1	0.0851	82.8	0.1035
236.7	0.0849	83.5	0.1037
237.3	0.0845	84.1	0.1039
237.9	0.084	84.7	0.104
238.5	0.0837	85.4	0.104
239.2	0.0834	86.1	0.1043
239.8	0.0829	86.7	0.1045
240.4	0.0825	87.3	0.1046
241	0.0822	88	0.1048
241.6	0.0817	88.7	0.1049
242.2	0.0812	89.3	0.1051
242.9	0.0808	89.9	0.1053
243.5	0.0805	90.6	0.1053
244.1	0.08	91.3	0.1056
244.7	0.0795	91.9	0.1057
245.3	0.0791	92.5	0.1059
245.9	0.0786	93.2	0.106
246.6	0.0781	93.9	0.1063
247.2	0.0778	94.5	0.1065
247.8	0.0772	95.1	0.1065
248.4	0.0769	95.8	0.1068
249	0.0764	96.5	0.107
249.6	0.076	97.1	0.1071
250.3	0.0756	97.7	0.1074
250.9	0.0752	98.4	0.1076
251.5	0.0749	99	0.1077
252.1	0.0744	99.7	0.1079
252.7	0.0739	100.3	0.1082
253.3	0.0736	101	0.1084
254	0.0735	101.6	0.1087
254.6	0.073	102.3	0.1088
255.2	0.0727	102.9	0.1091
255.8	0.0725	103.6	0.1094
256.4	0.0722	104.2	0.1096
257	0.0719	104.9	0.1099
257.7	0.0716	105.5	0.1101
258.3	0.0715	106.2	0.1104
258.9	0.071	106.8	0.1105
259.5	0.071	107.5	0.1108
260.1	0.0707	108.1	0.1111
260.8	0.0704	108.8	0.1115
261.4	0.0702	109.4	0.1118
262	0.0701	110.1	0.1121
262.6	0.0698	110.7	0.1124
263.2	0.0696	111.4	0.1127
263.8	0.0694	112	0.1128
264.4	0.0693	112.7	0.1132
265.1	0.0691	113.3	0.1136
265.7	0.069	114	0.1138
266.3	0.0688	114.6	0.1142
266.9	0.0685	115.3	0.1146
267.6	0.0685	115.9	0.1149
268.2	0.0684	116.6	0.1153
268.8	0.0682	117.2	0.1156
269.4	0.068	117.8	0.1159
270	0.0679	118.5	0.1163
270.6	0.0679	119.2	0.1167
271.2	0.0677	119.8	0.1172
271.9	0.0676	120.4	0.1173
272.5	0.0676	121.1	0.1178
273.1	0.0674	121.8	0.1183
273.7	0.0673	122.4	0.1186
274.3	0.0673	123	0.1187
274.9	0.0671	123.7	0.1192
275.6	0.0671	124.4	0.1195
276.2	0.067	125	0.12
276.8	0.0668	125.6	0.1203
277.4	0.0668	126.3	0.1208
278	0.0668	127	0.1211
278.7	0.0667	127.6	0.1214
279.3	0.0667	128.2	0.1218
279.9	0.0665	128.9	0.1221
280.5	0.0665	129.5	0.1225
281.1	0.0663	130.2	0.1229
281.7	0.0663	130.8	0.1232
282.4	0.0663	131.5	0.1235
283	0.0662	132.1	0.1239
283.6	0.0662	132.8	0.1243
284.2	0.066	133.4	0.1246
284.8	0.066	134.1	0.1249
285.5	0.066	134.7	0.1252
286.1	0.066	135.4	0.1256
286.7	0.066	136	0.1259
287.3	0.066	136.7	0.126
287.9	0.0659	137.3	0.1263
288.5	0.0659	138	0.1266
289.2	0.0659	138.6	0.127
289.8	0.0659	139.3	0.1271
290.4	0.0657	139.9	0.1274
291	0.0657	140.6	0.1276
291.6	0.0656	141.2	0.1279
292.2	0.0656	141.9	0.128
292.8	0.0656	142.5	0.1283
293.5	0.0656	143.2	0.1283
294.1	0.0654	143.8	0.1287
294.7	0.0656	144.5	0.1288
295.3	0.0654	145.1	0.1291
296	0.0654	145.8	0.1293
296.6	0.0653	146.4	0.1296
297.2	0.0654	147.1	0.1297
297.8	0.0653	147.7	0.1299
298.4	0.0653	148.4	0.1301
299	0.0653	149	0.1302
299.6	0.0651	149.7	0.1305
300.3	0.0651	150.3	0.1307
300.9	0.0651	151	0.1308
301.5	0.0649	151.6	0.1308
302.1	0.0649	152.2	0.1311
302.8	0.0649	152.9	0.1311
303.4	0.0649	153.6	0.1313
304	0.0648	154.2	0.1316
304.6	0.0648	154.8	0.1318
305.2	0.0648	155.5	0.1319
305.8	0.0648	156.2	0.1319
306.4	0.0646	156.8	0.1321
307.1	0.0646	157.4	0.1322
307.7	0.0646	158.1	0.1324
308.3	0.0646	158.8	0.1324
308.9	0.0646	159.4	0.1327
309.5	0.0645	160	0.1327
310.1	0.0645	160.7	0.133
310.8	0.0643	161.4	0.133
311.4	0.0643	162	0.1332
312	0.0643	162.6	0.1333
312.6	0.0643	163.3	0.1333
313.2	0.0642	164	0.1335
313.9	0.064	164.6	0.1336
314.5	0.0642	165.2	0.1336
315.1	0.064	165.9	0.1338
315.7	0.064	166.6	0.1339
316.3	0.0639	167.2	0.1341
316.9	0.0639	167.8	0.1341
317.6	0.0639	168.5	0.1342
318.2	0.0639	169.1	0.1344
318.8	0.0637	169.8	0.1344
319.4	0.0637	170.4	0.1345
320	0.0636	171.1	0.1347
320.7	0.0636	171.7	0.1349
321.3	0.0634	172.4	0.135
321.9	0.0634	173	0.135
322.5	0.0632	173.7	0.1353
323.1	0.0632	174.3	0.1353
323.7	0.0632	175	0.1355
324.4	0.0631	175.6	0.1356
325	0.0631	176.3	0.1356
325.6	0.0629	176.9	0.1356
326.2	0.0629	177.6	0.1358
326.8	0.0628	178.2	0.1359
327.4	0.0628	178.9	0.1361
328.1	0.0628	179.5	0.1363
328.7	0.0626	180.2	0.1364
329.3	0.0625	180.8	0.1364
329.9	0.0625	181.5	0.1366
330.5	0.0623	182.1	0.1366
331.2	0.0623	182.8	0.1367
331.8	0.0622	183.4	0.137
332.4	0.0622	184.1	0.1372
333	0.0622	184.7	0.1372
333.6	0.0618	185.4	0.1373
334.2	0.0618	186	0.1375
334.9	0.0618	186.7	0.1376
335.5	0.0617	187.3	0.1376
336.1	0.0615	188	0.1378
336.7	0.0614	188.6	0.138
337.3	0.0614	189.3	0.1381
338	0.0612	189.9	0.1383
338.6	0.0612	190.6	0.1384
339.2	0.0611	191.2	0.1386
339.8	0.0609	191.9	0.1387
340.4	0.0608	192.5	0.1389
341	0.0608	193.1	0.1392
341.7	0.0606	193.8	0.1392
342.3	0.0606	194.5	0.1395
342.9	0.0605	195.1	0.1397
343.5	0.0603	195.7	0.1398
344.1	0.0601	196.4	0.14
344.7	0.06	197.1	0.1401
345.3	0.06	197.7	0.1403
346	0.0598	198.3	0.1406
346.6	0.0597	199	0.1407
347.2	0.0595	199.7	0.1411
347.8	0.0594	200.3	0.1412
348.4	0.0592	200.9	0.1414
349.1	0.0591	201.6	0.1417
349.7	0.0589	202.3	0.142
350.3	0.0587	202.9	0.1421
350.9	0.0586	203.5	0.1423
351.5	0.0584	204.2	0.1426
352.1	0.0583	204.9	0.1429
352.8	0.0581	205.5	0.1431
353.4	0.058	206.1	0.1434
354	0.0578	206.8	0.1435
354.6	0.0577	207.5	0.1437
355.2	0.0574	208.1	0.144
355.9	0.0572	208.7	0.1442
356.5	0.057	209.4	0.1445
357.1	0.0569	210.1	0.1448
357.7	0.0566	210.7	0.1451
358.3	0.0564	211.3	0.1454
358.9	0.0563	212	0.1456
359.6	0.056	212.6	0.1459
360.2	0.0558	213.3	0.146
360.8	0.0555	213.9	0.1463
361.4	0.0553	214.6	0.1465
362	0.055	215.2	0.1468
362.6	0.0549	215.9	0.1471
363.3	0.0546	216.5	0.1474
363.9	0.0544	217.2	0.1477
364.5	0.0541	217.8	0.1479
365.1	0.0538	218.5	0.1482
365.7	0.0536	219.1	0.1485
366.4	0.0533	219.8	0.1488
367	0.0532	220.4	0.149
367.6	0.0527	221.1	0.1493
368.2	0.0525	221.7	0.1496
368.8	0.0522	222.4	0.1499
369.4	0.0519	223	0.1502
370	0.0516	223.7	0.1505
370.7	0.0513	224.3	0.1508
371.3	0.051	225	0.1511
371.9	0.0505	225.6	0.1514
372.5	0.0504	226.3	0.1518
373.1	0.0501	226.9	0.1522
373.7	0.0496	227.6	0.1525
374.4	0.0493	228.2	0.153
375	0.0488	228.9	0.1533
375.6	0.0485	229.5	0.1538
376.2	0.0481	230.2	0.1541
376.8	0.0477	230.8	0.1545
377.5	0.0474	231.5	0.155
378.1	0.047	232.1	0.1555
378.7	0.0465	232.8	0.1559
379.3	0.0462	233.4	0.1564
379.9	0.0457	234.1	0.157
380.5	0.0453	234.7	0.1575
381.2	0.0448	235.4	0.1581
381.8	0.0443	236	0.1587
382.4	0.0439	236.7	0.1592
383	0.0434	237.3	0.1598
383.6	0.0429	238	0.1604
384.3	0.0423	238.6	0.1612
384.9	0.0419	239.3	0.1617
385.5	0.0414	239.9	0.1625
386.1	0.0408	240.6	0.1632
386.7	0.0401	241.2	0.1637
387.3	0.0397	241.8	0.1645
388	0.0391	242.5	0.1651
388.6	0.0384	243.2	0.1659
389.2	0.0377	243.8	0.1665
389.8	0.0372	244.4	0.1673
390.4	0.0366	245.1	0.1679
391	0.0358	245.8	0.1685
391.7	0.0353	246.4	0.169
392.3	0.0346	247	0.1696
392.9	0.0339	247.7	0.1702
393.5	0.0332	248.4	0.1708
394.1	0.0324	249	0.1714
394.8	0.0318	249.6	0.1721
395.4	0.0308	250.3	0.1727
396	0.0301	251	0.1733
396.6	0.0293	251.6	0.1738
397.2	0.0284	252.2	0.1744
397.8	0.0274	252.9	0.175
398.4	0.0267	253.5	0.1756
399.1	0.0257	254.2	0.1762
399.7	0.025	254.8	0.1769
400.3	0.024	255.5	0.1775
400.9	0.0229	256.1	0.1781
401.5	0.022	256.8	0.1787
402.2	0.0209	257.4	0.1793
402.8	0.02	258.1	0.18
403.4	0.0189	258.7	0.1806
404	0.0178	259.4	0.1812
404.6	0.0169	260	0.182
405.2	0.0158	260.7	0.1826
405.9	0.0147	261.3	0.1834
406.5	0.0135	262	0.1842
407.1	0.0124	262.6	0.1848
407.7	0.0113	263.3	0.1854
408.3	0.0104	263.9	0.1862
408.9	0.0091	264.6	0.1869
409.6	0.0081	265.2	0.1877
410.2	0.007	265.9	0.1885
410.8	0.0057	266.5	0.1893
411.2	0.005	267.2	0.19
#VALUE!	--	267.8	0.1908
#VALUE!	--	268.5	0.1916
0.2	0.0335	269.1	0.1925
0.5	0.0386	269.8	0.1933
1.1	0.0437	270.4	0.1939
1.7	0.0485	271.1	0.1947
2.4	0.0529	271.7	0.1955
3	0.057	272.4	0.1962
3.6	0.0608	273	0.1972
4.2	0.0643	273.7	0.1979
4.8	0.0677	274.3	0.1987
5.5	0.0708	275	0.1997
6.1	0.0736	275.6	0.2004
6.7	0.0763	276.3	0.2014
7.3	0.0787	276.9	0.2023
7.9	0.0808	277.6	0.2032
8.6	0.0829	278.2	0.2041
9.2	0.0846	278.9	0.2051
9.8	0.086	279.5	0.2062
10.4	0.0876	280.2	0.2072
11	0.089	280.8	0.2083
11.7	0.0902	281.5	0.2096
12.3	0.0913	282.1	0.2108
12.9	0.0924	282.8	0.2121
13.5	0.0932	283.4	0.2134
14.1	0.0939	284	0.2148
14.7	0.0947	284.7	0.2162
15.4	0.0955	285.4	0.2178
16	0.096	286	0.2189
16.6	0.0964	286.6	0.2203
17.2	0.097	287.3	0.2214
17.8	0.0973	288	0.2224
18.5	0.0978	288.6	0.2232
19.1	0.0981	289.2	0.224
19.7	0.0986	289.9	0.2246
20.3	0.0987	290.6	0.2251
20.9	0.0992	291.2	0.2257
21.6	0.0994	291.8	0.226
22.2	0.0995	292.5	0.2265
22.8	0.0998	293.1	0.2269
23.4	0.1	293.8	0.2274
24	0.1001	294.4	0.2279
24.7	0.1003	295.1	0.2283
25.3	0.1004	295.7	0.2289
25.9	0.1006	296.4	0.2296
26.5	0.1006	297	0.2302
27.1	0.1008	297.7	0.231
27.8	0.1009	298.3	0.2316
28.4	0.1009	299	0.2327
29	0.1011	299.6	0.2336
29.6	0.1012	300.3	0.2347
30.2	0.1012	300.9	0.2361
30.9	0.1012	301.6	0.2376
31.5	0.1014	302.2	0.2395
32.1	0.1015	302.9	0.2415
32.7	0.1017	303.5	0.2435
33.3	0.1017	304.2	0.2463
34	0.1018	304.8	0.2491
34.6	0.1017	305.5	0.2524
35.2	0.1018	306.1	0.2559
35.8	0.102	306.8	0.2598
36.4	0.102	307.4	0.2638
37.1	0.102	308.1	0.2682
37.7	0.102	308.7	0.2728
38.3	0.1022	309.4	0.2776
38.9	0.1023	310	0.2827
39.5	0.1023	310.6	0.2879
40.2	0.1023	311.2	0.293
40.8	0.1023	311.8	0.2981
41.4	0.1025	312.3	0.3032
42	0.1025	312.9	0.3083
42.6	0.1026	313.4	0.3134
43.3	0.1026	313.9	0.3185
43.9	0.1028	314.4	0.3237
44.5	0.1028	314.9	0.3288
45.1	0.1028	315.4	0.3339
45.7	0.1029	315.9	0.339
46.4	0.1029	316.4	0.3441
47	0.1029	316.8	0.3492
47.6	0.1029	317.3	0.3544
48.2	0.1031	317.7	0.3595
48.9	0.1031	318.1	0.3646
49.5	0.1031	318.6	0.3697
50.1	0.1032	319	0.3748
50.7	0.1032	319.4	0.3799
51.3	0.1034	319.7	0.385
52	0.1034	320.2	0.3902
52.6	0.1034	320.6	0.3953
53.2	0.1035	320.9	0.4004
53.8	0.1035	321.3	0.4055
54.4	0.1037	321.7	0.4106
55.1	0.1037	322	0.4157
55.7	0.1037	322.4	0.4209
56.3	0.1039	322.7	0.426
56.9	0.1039	323.1	0.4311
57.5	0.104	323.4	0.4362
58.2	0.104	323.7	0.4413
58.8	0.1042	324	0.4464
59.4	0.1042	324.4	0.4515
60	0.1043	324.7	0.4567
60.6	0.1043	325	0.4618
61.3	0.1045	325.3	0.4669
61.9	0.1045	325.6	0.472
62.5	0.1046	325.9	0.4771
63.1	0.1046	326.2	0.4822
63.7	0.1046	326.4	0.4874
64.4	0.1048	326.7	0.4925
65	0.1049	327	0.4976
65.6	0.1049	327.3	0.5029
66.2	0.1051	327.6	0.508
66.8	0.1051	327.8	0.5131
67.5	0.1053	328.1	0.5182
68.1	0.1053	328.4	0.5233
68.7	0.1054	328.6	0.5284
69.3	0.1054	328.8	0.5335
69.9	0.1056	329.1	0.5387
70.6	0.1057	329.3	0.5438
71.2	0.1057	329.5	0.5489
71.8	0.1059	329.8	0.554
72.4	0.106	330	0.5591
73	0.106	330.2	0.5642
73.7	0.1062	330.5	0.5694
74.3	0.1063	330.7	0.5745
74.9	0.1063	330.9	0.5797
75.5	0.1065	331.1	0.5849
76.1	0.1066	331.3	0.59
76.8	0.1068	331.5	0.5951
77.4	0.107	331.8	0.6002
78	0.107	331.9	0.6053
78.6	0.1071	332.1	0.6104
79.2	0.1073	332.4	0.6155
79.9	0.1074	332.5	0.6207
80.5	0.1074	332.7	0.6258
81.1	0.1076	332.9	0.6309
81.7	0.1077	333.1	0.636
82.3	0.1079	333.3	0.6411
83	0.108	333.5	0.6462
83.6	0.1082	333.7	0.6514
84.2	0.1085	333.8	0.6565
84.8	0.1085	334	0.6616
85.4	0.1087	334.2	0.6667
86.1	0.1088	334.4	0.6718
86.7	0.109	334.5	0.6769
87.3	0.1093	334.7	0.682
87.9	0.1094	334.9	0.6872
88.5	0.1094	335	0.6923
89.2	0.1097	335.2	0.6974
89.8	0.1099	335.4	0.7025
90.4	0.1101	335.6	0.7078
91	0.1102	335.7	0.7129
91.6	0.1104	335.9	0.718
92.3	0.1107	336	0.7231
92.9	0.1108	336.2	0.7282
93.5	0.111	336.3	0.7334
94.1	0.1113	336.5	0.7385
94.7	0.1113	336.6	0.7436
95.4	0.1115	336.8	0.7487
96	0.1118	336.9	0.7538
96.6	0.1119	337.1	0.7589
97.2	0.1122	337.2	0.764
97.8	0.1124	337.3	0.7692
98.4	0.1127	337.5	0.7743
99.1	0.113	337.6	0.7794
99.7	0.1132	337.8	0.7845
100.3	0.1135	337.9	0.7896
100.9	0.1136	338.1	0.7947
101.6	0.1139	338.2	0.7999
102.2	0.1142	338.3	0.805
102.8	0.1146	338.5	0.8101
103.4	0.1147	338.6	0.8152
104	0.115	338.7	0.8203
104.7	0.1153	338.9	0.8254
105.3	0.1156	339	0.8305
105.9	0.1159	339.2	0.8357
106.5	0.1163	339.3	0.8408
107.1	0.1166	339.4	0.8459
107.8	0.1169	339.6	0.851
108.4	0.117	339.7	0.8561
109	0.1175	339.8	0.8612
109.6	0.1178	339.9	0.8664
110.2	0.118	340.1	0.8715
110.9	0.1184	340.2	0.8766
111.5	0.1187	340.4	0.8817
112.1	0.119	340.5	0.8868
112.7	0.1194	340.6	0.8919
113.3	0.1198	340.8	0.897
114	0.1201	340.9	0.9022
114.6	0.1204	341	0.9073
115.2	0.1209	341.1	0.9125
115.8	0.1212	341.3	0.9177
116.4	0.1215	341.4	0.9228
117.1	0.1218	341.5	0.9279
117.7	0.1221	341.6	0.933
118.3	0.1226	341.8	0.9381
118.9	0.1229	341.9	0.9432
119.5	0.1234	342	0.9485
120.2	0.1237	342.2	0.9536
120.8	0.1242	342.3	0.9587
121.4	0.1245	342.4	0.9639
122	0.1248	342.5	0.969
122.6	0.1251	342.6	0.9741
123.3	0.1256	342.8	0.9792
123.9	0.1259	342.9	0.9843
124.5	0.1262	343	0.9894
125.1	0.1265	343.1	0.9947
125.7	0.1268	343.3	0.9998
126.4	0.1271	343.3	1
127	0.1276
127.6	0.1279
128.2	0.1282
128.8	0.1285
129.5	0.1288
130.1	0.1291
130.7	0.1294
131.3	0.1296
131.9	0.1301
132.6	0.1302
133.2	0.1304
133.8	0.1307
134.4	0.131
135	0.1313
135.7	0.1316
136.3	0.1318
136.9	0.1321
137.5	0.1322
138.2	0.1325
138.8	0.1325
139.4	0.1328
140	0.1332
140.6	0.1333
141.3	0.1335
141.9	0.1336
142.5	0.1338
143.1	0.1341
143.7	0.1342
144.4	0.1344
145	0.1345
145.6	0.1347
146.2	0.1349
146.8	0.135
147.5	0.135
148.1	0.1353
148.7	0.1355
149.3	0.1355
149.9	0.1356
150.6	0.1358
151.2	0.1359
151.8	0.1359
152.4	0.1361
153	0.1361
153.7	0.1363
154.3	0.1364
154.9	0.1364
155.5	0.1364
156.1	0.1366
156.8	0.1367
157.4	0.1367
158	0.1369
158.6	0.1369
159.2	0.137
159.9	0.137
160.5	0.1372
161.1	0.1372
161.7	0.1373
162.3	0.1375
163	0.1375
163.6	0.1376
164.2	0.1376
164.8	0.1376
165.4	0.1378
166.1	0.138
166.7	0.138
167.3	0.138
167.9	0.1381
168.5	0.1381
169.2	0.1383
169.8	0.1383
170.4	0.1384
171	0.1384
171.6	0.1384
172.3	0.1386
172.9	0.1386
173.5	0.1387
174.1	0.1387
174.7	0.1389
175.4	0.1387
176	0.1389
176.6	0.1389
177.2	0.139
177.8	0.139
178.5	0.139
179.1	0.1392
179.7	0.1392
180.3	0.1394
180.9	0.1394
181.6	0.1394
182.2	0.1395
182.8	0.1395
183.4	0.1397
184	0.1397
184.7	0.1397
185.3	0.1398
185.9	0.1398
186.5	0.14
187.1	0.14
187.8	0.1401
188.4	0.1401
189	0.1403
189.6	0.1403
190.2	0.1404
190.9	0.1404
191.5	0.1404
192.1	0.1406
192.7	0.1406
193.3	0.1407
194	0.1409
194.6	0.1409
195.2	0.1411
195.8	0.1411
196.4	0.1412
197.1	0.1412
197.7	0.1414
198.3	0.1415
198.9	0.1415
199.5	0.1417
200.2	0.1417
200.8	0.1418
201.4	0.142
202	0.1421
202.7	0.1421
203.3	0.1423
203.9	0.1425
204.5	0.1426
205.1	0.1428
205.8	0.1428
206.4	0.1429
207	0.1431
207.6	0.1432
208.2	0.1435
208.9	0.1435
209.5	0.1438
210.1	0.144
210.7	0.1442
211.3	0.1443
212	0.1445
212.6	0.1448
213.2	0.1451
213.8	0.1452
214.4	0.1454
215.1	0.1457
215.7	0.146
216.3	0.1462
216.9	0.1465
217.6	0.1468
218.2	0.1471
218.8	0.1474
219.4	0.1476
220	0.1479
220.7	0.1482
221.3	0.1485
221.9	0.1488
222.5	0.1491
223.1	0.1494
223.8	0.1499
224.4	0.15
225	0.1505
225.6	0.1508
226.2	0.1511
226.9	0.1514
227.5	0.1518
228.1	0.1522
228.7	0.1525
229.3	0.1528
230	0.1533
230.6	0.1536
231.2	0.1541
231.8	0.1545
232.4	0.1549
233.1	0.1553
233.7	0.1558
234.3	0.1561
234.9	0.1566
235.5	0.1572
236.2	0.1576
236.8	0.1581
237.4	0.1586
238	0.159
238.6	0.1597
239.3	0.1601
239.9	0.1607
240.5	0.1612
241.1	0.1617
241.7	0.1621
242.4	0.1628
243	0.1632
243.6	0.1638
244.2	0.1645
244.8	0.1651
245.5	0.1656
246.1	0.1662
246.7	0.1666
247.3	0.1673
247.9	0.1677
248.6	0.1683
249.2	0.1688
249.8	0.1693
250.4	0.1699
251	0.1704
251.7	0.171
252.3	0.1714
252.9	0.1719
253.5	0.1724
254.1	0.173
254.8	0.1735
255.4	0.1739
256	0.1745
256.6	0.1752
257.2	0.1756
257.9	0.1762
258.5	0.1769
259.1	0.1775
259.7	0.1781
260.3	0.1787
261	0.1795
261.6	0.1801
262.2	0.1809
262.8	0.1815
263.4	0.1823
264.1	0.1832
264.7	0.1838
265.3	0.1848
265.9	0.1855
266.5	0.1863
267.2	0.1869
267.8	0.188
268.4	0.1888
269	0.1897
269.6	0.1907
270.3	0.1916
270.9	0.1924
271.5	0.1933
272.1	0.1941
272.7	0.195
273.4	0.1958
274	0.1967
274.6	0.1975
275.2	0.1983
275.8	0.1992
276.5	0.2
277.1	0.2007
277.7	0.2017
278.3	0.2024
278.9	0.2034
279.6	0.2043
280.2	0.2054
280.8	0.2065
281.4	0.2076
282	0.2088
282.7	0.21
283.3	0.2113
283.9	0.2125
284.5	0.2139
285.1	0.2153
285.7	0.2167
286.4	0.2181
287	0.2192
287.6	0.2201
288.2	0.2209
288.8	0.2215
289.5	0.222
290.1	0.2224
290.7	0.2227
291.3	0.2231
291.9	0.2234
292.6	0.2237
293.2	0.224
293.8	0.2245
294.4	0.2246
295	0.2249
295.7	0.2254
296.3	0.2257
296.9	0.226
297.5	0.2263
298.1	0.2268
298.8	0.2271
299.4	0.2277
300	0.2282
300.6	0.2286
301.3	0.2293
301.9	0.23
302.5	0.2308
303.1	0.2316
303.7	0.2327
304.4	0.2338
305	0.2352
305.6	0.2365
306.2	0.2384
306.8	0.2404
307.5	0.2429
308.1	0.2458
308.7	0.2491
309.3	0.2527
309.9	0.2565
310.5	0.2604
311.2	0.2646
311.8	0.2691
312.4	0.2737
313	0.2787
313.6	0.2838
314.2	0.2889
314.8	0.2941
315.3	0.2992
315.8	0.3043
316.3	0.3094
316.8	0.3145
317.3	0.3196
317.7	0.3247
318.2	0.3299
318.6	0.335
319	0.3401
319.4	0.3452
319.8	0.3503
320.2	0.3554
320.6	0.3606
321	0.3657
321.3	0.3708
321.7	0.3759
322.1	0.381
322.4	0.3861
322.7	0.3912
323.1	0.3964
323.4	0.4015
323.7	0.4066
324	0.4117
324.3	0.4168
324.6	0.4219
324.9	0.4271
325.2	0.4322
325.5	0.4373
325.8	0.4424
326	0.4475
326.3	0.4526
326.6	0.4577
326.8	0.4629
327.1	0.468
327.4	0.4731
327.6	0.4782
327.9	0.4833
328.1	0.4884
328.3	0.4936
328.6	0.4987
328.8	0.5038
329	0.5089
329.3	0.514
329.5	0.5191
329.7	0.5242
329.9	0.5294
330.1	0.5345
330.3	0.5396
330.5	0.5447
330.7	0.5498
330.9	0.5549
331.1	0.5601
331.3	0.5652
331.5	0.5703
331.7	0.5754
331.9	0.5805
332	0.5856
332.2	0.5907
332.4	0.5959
332.6	0.601
332.8	0.6061
332.9	0.6112
333.1	0.6163
333.3	0.6214
333.4	0.6266
333.6	0.6317
333.7	0.6368
333.9	0.6419
334.1	0.647
334.2	0.6521
334.3	0.6572
334.5	0.6624
334.7	0.6675
334.8	0.6726
334.9	0.6777
335.1	0.6828
335.2	0.6879
335.3	0.693
335.5	0.6982
335.6	0.7033
335.7	0.7084
335.9	0.7137
336	0.7188
336.1	0.7239
336.3	0.729
336.4	0.7341
336.5	0.7392
336.6	0.7444
336.8	0.7495
336.9	0.7546
337	0.7597
337.1	0.7648
337.2	0.7699
337.3	0.775
337.4	0.7802
337.6	0.7853
337.7	0.7904
337.8	0.7955
337.9	0.8006
338	0.8057
338.1	0.8109
338.2	0.816
338.3	0.8211
338.4	0.8262
338.5	0.8313
338.6	0.8364
338.7	0.8415
338.9	0.8467
339	0.8519
339.1	0.8572
339.2	0.8623
339.3	0.8674
339.4	0.8726
339.5	0.8777
339.6	0.8828
339.7	0.8879
339.8	0.893
339.9	0.8983
340	0.9034
340.1	0.9085
340.2	0.9136
340.3	0.9187
340.4	0.9239
340.5	0.929
340.6	0.9341
340.7	0.9392
340.8	0.9443
340.9	0.9496
341	0.9547
341.1	0.9598
341.2	0.9649
341.3	0.9701
341.4	0.9752
341.5	0.9803
341.6	0.9854
341.7	0.9905
341.8	0.9956
341.9	1

## Sheet: dQdV
Gr	30preGr
-0.26555	-22.9808
-0.29226	-37.8531
-0.3368	-58.5882
-0.37291	-67.3824
-0.40385	-73.2353
-0.4634	-76.1667
-0.49804	-79.098
-0.5437	-78.356
-0.55194	-81.2873
-0.6024	-84.951
-0.77984	-84.951
-0.78095	-90.8137
-0.72115	-90.8137
-0.79082	-89.9123
-0.86963	-92.8437
-1.08551	-99.598
-1.10432	-102.529
-1.2319	-102.529
-1.34065	-105.461
-1.48163	-105.461
-1.59595	-107.312
-1.75675	-110.243
-1.97714	-114.245
-1.85855	-117.176
-1.9861	-123.039
-2.09453	-125.971
-2.90714	-127.25
-2.79872	-134.209
-2.9669	-136.958
-3.08549	-141.433
-2.94866	-147.658
-2.86366	-156.88
-3.00048	-162.611
-4.20446	-171.741
-4.13364	-204.65
-4.00292	-239.749
-4.19017	-291.535
-4.08198	-384.265
-4.00292	-517.906
-4.1499	-612.523
-4.07648	-678.972
-4.0377	-912.972
-6.4085	-958.625
-6.4085	-803.062
-4.07374	-939.938
-6.38093	-958.625
-6.34489	-933.792
-4.11676	-933.729
-6.32329	-958.646
-6.24423	-1017.33
-6.24423	-783.25
-6.24423	-678.972
-6.4085	-776.035
-6.37112	-776.035
-6.38093	-650.449
-6.4183	-650.394
-4.23203	-693.867
-6.14076	-677.311
-6.14076	-647.384
-6.36515	-663.995
-6.36515	-664.04
-4.35294	-560.235
-6.36515	-560.235
-6.36515	-551.664
-6.14968	-566.546
-8.08433	-612.518
-6.16667	-551.664
-6.4085	-514.263
-6.48756	-560.235
-6.40385	-572.735
-8.62217	-572.689
-6.44728	-540.119
-6.29245	-515.263
-6.37458	-547.792
-6.28758	-515.221
-8.46405	-515.263
-8.62217	-508.667
-8.53846	-533.568
-6.4457	-560.277
-6.36515	-560.231
-8.55142	-551.619
-10.4173	-566.596
-10.4075	-566.558
-8.70588	-551.626
-10.8824	-572.693
-13.0588	-559.102
-10.8922	-584.045
-10.8922	-597.591
-15.0679	-647.384
-15.0679	-647.429
-15.2451	-663.985
-15.2451	-730.389
-15.2353	-650.449
-17.4118	-613.877
-19.598	-657.35
-19.4306	-720.888
-19.4208	-757.354
-21.7745	-776.042
-21.7745	-739.575
-21.7745	-677.256
-23.951	-759.431
-25.8665	-776.097
-25.8763	-650.404
-26.1274	-754.753
-28.3039	-798.271
-30.4804	-739.513
-30.4804	-859.027
-32.6569	-776.914
-34.4983	-693.867
-34.5081	-776.042
-37.0098	-759.486
-39.1863	-759.424
-39.1961	-880.384
-41.3627	-861.759
-43.1205	-939.938
-43.1303	-958.625
-45.7255	-821.688
-45.7157	-803
-45.7157	-940.021
-47.902	-1095.58
-47.902	-1070.67
-49.576	-1070.75
-49.5662	-1017.33
-50.0686	-1291.25
-50.0784	-1213.94
-50.0784	-1049.49
-52.2549	-1479.05
-51.7525	-1479.15
-53.9289	-1703.07
-54.4314	-1703.07
-52.2451	-1205.23
-54.4216	-1593.5
-56.6078	-1703.07
-54.4314	-1753.07
-53.8871	-1917.29
-53.8871	-1606
-54.4314	-1880.04
-54.4314	-2191.17
-54.4314	-2141.33
-52.2549	-2141.5
-49.576	-2191.17
-51.7426	-2664.25
-50.0686	-2664.42
-50.0784	-4382.17
-47.902	-4382.17
-45.7255	-2664.42
-45.7157	-2664.25
-43.1205	-2739
-43.1303	-4930
-41.3627	-4855.25
-41.3627	-4855.75
-41.3725	-4930.25
-37.0098	-4780.75
-36.6329	-4781
-38.8192	-4930
-39.1863	-6498.75
-39.1863	-6498.75
-37.0196	-4930
-37.0098	-3287
-37.0098	-8067.5
-36.6427	-8067.5
-38.8094	-4780.5
-37.0098	-4780.5
-34.8333	-8217
-37.0098	-9785.75
-39.1961	-6498.75
-36.675	-4930
-36.675	-4855.5
-37.0196	-6499
-37.0098	-6524
-39.1863	-4880.25
-37.0098	-8067.75
-37.0098	-9636.5
-38.8192	-9785.5
-38.8094	-8217
-39.1863	-8067.5
-39.1961	-8030.12
-39.1863	-8179.62
-39.1863	-8217
-38.8192	-4780.5
-40.9859	-6424
-43.5392	-6424
-41.3725	-4780.5
-41.3725	-8217
-43.5392	-9785.75
-45.7157	-6499
-45.3068	-6424.25
-45.3068	-4233
-45.7157	-4382.25
-45.7157	-9711.25
-50.0784	-8067.75
-50.0784	-4930.25
-49.576	-4855.75
-49.576	-4855.25
-50.0686	-4930
-52.2451	-4855.5
-52.2549	-4307.67
-52.2549	-4382.67
-52.2549	-8142.5
-51.7525	-5901.17
-51.7525	-4332.67
-54.4314	-4930.5
-54.4314	-3286.75
-54.4314	-4780.75
-54.4216	-6424.25
-53.8773	-6424.25
-56.0635	-4781
-56.6078	-4930
-56.6078	-4930
-56.6078	-4781
-56.6078	-5328.67
-58.7843	-3834.42
-58.24	-2689.08
-56.0635	-2689.33
-58.7843	-4930
-58.7843	-4930
-58.7843	-4781
-58.7843	-4780.75
-58.1981	-2738.92
-60.3746	-2664.42
-60.9608	-4855.25
-58.7843	-4930
-58.7843	-4930.5
-60.9608	-4332.67
-60.9608	-2141.33
-60.3746	-2739.17
-60.3746	-2739
-60.9608	-2664.25
-60.9608	-4855.75
-63.1373	-4930.25
-65.3137	-2689.08
-63.1373	-2141.5
-62.5092	-4382.17
-62.519	-4930
-65.3235	-2689.33
-67.4902	-2141.33
-65.3137	-2739
-67.4902	-2739
-66.8622	-2141.33
-66.8622	-4332.83
-69.6667	-4108.62
-71.8529	-4108.62
-71.8529	-3914.5
-69.6667	-3914
-74.0196	-3943.9
-75.494	-2226.15
-73.3175	-2664.25
-74.0196	-4382.5
-76.1961	-3944.4
-78.3824	-1703.07
-80.5588	-2141.33
-79.7954	-2191.33
-79.8052	-2191.17
-82.7353	-2664.25
-84.9118	-2390.5
-84.9118	-1643.38
-84.9118	-1917.29
-87.0882	-2141.5
-88.3854	-2141.33
-90.5618	-1917.25
-91.4412	-2390.5
-91.4412	-2226.05
-95.7941	-1752.97
-97.9706	-1880.04
-97.0075	-1606
-101.37	-1917.29
-102.333	-2191.17
-102.324	-2141.33
-104.5	-1703.23
-108.863	-1752.9
-113.216	-2191.17
-112.127	-1880.04
-112.127	-2427.62
-115.392	-2300.65
-120.964	-1703.23
-125.629	-2141.33
-122.233	-2191.17
-123.555	-2191.33
-129.542	-2664.17
-133.86	-2390.25
-135.238	-2465.25
-132.771	-2689.17
-135.711	-2141.33
-138.178	-2191.33
-143.113	-2738.92
-146.326	-2689.08
-142.023	-2141.5
-143.745	-4382.17
-144.683	-4332.33
-146.488	-2689.33
-147.21	-3286.75
-147.21	-4930.25
-151.659	-4855.75
-151.659	-2664.25
-153.554	-2191.17
-155.45	-7519.67
-154.597	-8067.5
-160.912	-4930
-163.758	-4930
-163.745	-3212.25
-167.305	-4855.25
-167.305	-6573.5
-175.468	-6424
-182.882	-4780.5
-185.653	-11354.5
-187.9	-12997.8
-197.321	-6424.25
-203.924	-8067.75
-211.326	-6499
-235.396	-5901.25
-274.26	-10906
-322.622	-12997.8
-394.794	-12997.8
-444.143	-13072.5
-532.971	-12923
-1060.4	-12923
-1267.67	-9786
-962.31	-8142.5
-1221.39	-21140
-1399.05	-17927.8
-1221.4	-8067.75
-1376.85	-11280
-1399.05	-14566.5
-1658.13	-11354.2
-1658.13	-14641.2
-1621.13	-14641.5
-1776.58	-4855.5
-1399.15	-12923
-1243.7	-12997.8
-1399.05	-6424.25
-1776.58	-9636.5
-1443.48	-9785.5
-1221.39	-4930
-1399.05	-11354.5
-1139.97	-12923
-1117.77	-6499
-1117.77	-6573.75
-1139.97	-4855.5
-1139.97	-8142.25
-1036.33	-9785.5
-1017.83	-6499
-888.292	-4930.5
-906.792	-11354.5
-906.792	-11354.2
-906.792	-4930.25
-906.792	-4855.75
-721.736	-3212
-721.736	-8067.75
-777.25	-8067.75
-734.069	-4930.25
-734.069	-4930.25
-734.069	-8067.75
-678.556	-8067.75
-644.011	-4780.75
-656.344	-6424.25
-690.944	-6573.75
-645.3	-4071.38
-610.7	-2975.54
-621.8	-8615.17
-593.536	-7519.67
-593.536	-3237
-583.445	-3784.83
-583.445	-3287
-621.8	-4930
-593.536	-4855.25
-565.273	-4855.75
-555.182	-4930.25
-555.182	-4930.25
-565.273	-4332.83
-565.273	-2141.33
-582.436	-2739
-582.436	-3212.25
-565.273	-4855.25
-565.273	-4930
-628.081	-4781
-617.99	-3794.8
-555.182	-3944.3
-628.081	-4108.62
-628.081	-3959.12
-628.081	-4781
-720.194	-2739
-720.194	-2191.17
-734.069	-2141.5
-734.069	-4332.33
-656.394	-4108.25
-685.7	-1917.42
-720.194	-2141.33
-734.069	-4332.67
-832.768	-3944.4
-755.043	-1703.07
-739.186	-2141.33
-816.911	-2191.33
-777.25	-2191.17
-777.25	-2141.33
-832.768	-1867.58
-832.768	-1643.38
-763.375	-1449.12
-763.375	-1723.17
-734.069	-1752.97
-863.611	-1752.97
-851.278	-1880.04
-721.736	-2427.62
-777.25	-2191.08
-777.25	-1205.13
-832.768	-1441.67
-818.893	-1441.78
-763.375	-1314.7
-906.792	-1441.67
-906.792	-1441.78
-906.792	-1314.7
-1017.83	-1479.05
-1017.83	-1269.96
-1139.97	-1269.84
-1140.05	-1369.46
-1140.05	-1017.4
-1221.4	-992.405
-1376.85	-1344.58
-1399.05	-1291.32
-1243.6	-939.071
-1399.05	-861.688
-1776.58	-940.021
-1621.13	-958.646
-1658.13	-933.729
-1658.13	-851.617
-1658.13	-876.45
-1785.83	-912.972
-1526.75	-713.833
-1813.58	-759.424
-2072.67	-776.035
-2072.67	-693.872
-2072.67	-776.864
-2035.67	-776.914
-2553.83	-627.473
-2331.75	-627.473
-2849.92	-613.927
-3109	-613.877
-2535.33	-657.35
-3053.5	-613.927
-2590.83	-584
-3109.17	-597.591
-4108.5	-597.636
-8253.67	-560.235
-7772.5	-514.263
-3053.5	-526.763
-10826	-572.689
-10881.5	-560.231
-7661.5	-514.304
-9216	-526.721
-9327	-508.661
-9271.5	-496.244
--	-514.266
--	-526.724
-7717	-423.25
-7717	-298.667
-10826.2	--
-13879.8	--
-9271.5	--
-6162.5	--
-15489.5	--
-13990.5	--
-13879.5	--
-15434	--
-12325	--
-12269.5	--
-7717	--
-7773	--
-6163	--
-9271.5	--
-9327	--
-9216	--
-9216	--
-6218	--
-6162.5	--
-9271.5	--
-7772.5	--
-4608	--
-6162.5	--
-6218	--
-9216	--
-7661.5	--
-4663.5	--
-4663.5	--
-7661.5	--
-7661.75	--
-3627.42	--
-4108.33	--
-5144.67	--
-4145.33	--
-3072	--
-8253.67	--
-6995.25	--
-3886.25	--
-4608	--
-4608	--
-4663.5	--
-2590.83	--
-4145.33	--
-4608	--
-2535.33	--
-2590.83	--
-2590.83	--
-4145.33	--
-4108.33	--
-2553.83	--
-2590.83	--
-2072.67	--
-2591.08	--
-2591.08	--
-2035.67	--
-2035.67	--
-2590.83	--
-2590.83	--
-2035.67	--
-2035.67	--
-2072.67	--
-2072.67	--
-2072.67	--
-2035.67	--
-2035.67	--
-1658.13	--
-2176.3	--
-2331.75	--
-1376.85	--
-1635.93	--
-2072.67	--
-1658.13	--
-1399.05	--
-1776.58	--
-1621.13	--
-1243.6	--
-1399.05	--
-1813.58	--
-1635.93	--
-1221.4	--
-1399.05	--
-1399.05	--
-1243.7	--
-1621.23	--
-1517.5	--
-1554.5	--
-1658.13	--
-1371.3	--
-1526.75	--
-1554.5	--
-1813.58	--
-1658.13	--
-1221.4	--
-1635.93	--
-4145.33	--
-3730.8	--
-1658.13	--
-2535.33	--
-2535.33	--
-2072.67	--
-2072.67	--
-4034.33	--
-3619.8	--
-2694.47	--
-3109	--
-2535.33	--
-4608	--
-4145.33	--
-2590.83	--
-3109	--
-4552.5	--
-4552.75	--
-4663.75	--
-4663.5	--
-2590.83	--
-7143.33	--
-7661.5	--
-3109	--
-4663.5	--
-6162.5	--
-6162.5	--
-6218	--
-6218	--
-6162.5	--
-9271.5	--
-7772.5	--
--	--
--	--
-6218	--
-6162.5	--
-12381	--
-12381	--
-21596.5	--
-24705.5	--
-12380.5	--
-17044	--
-26260	--
-20042.2	--
-10770.8	--
-18487.5	--
-20097.5	--
-10770.5	--
-6107	--
-15434	--
-17469.7	--
-11307.4	--
-12380.8	--
-9327	--
-6218	--
-12325	--
-12325	--
-9216	--
-10770.5	--
-7661.5	--
-6107	--
-9327	--
-8522	--
-11631.5	--
-10826.5	--
-4608	--
-6218	--
-9216	--
-7661.5	--
-4663.5	--
-6218	--
-9216	--
-7661.5	--
-3109	--
-4663.5	--
-6162.5	--
-6162.5	--
-4663.5	--
-4663.5	--
-4608	--
-4608	--
-4663.5	--
-3109	--
-4663.5	--
-4608	--
-4608	--
-4663.75	--
-4663.75	--
-4663.5	--
-4552.5	--
-4034.33	--
-2590.83	--
-3109	--
-4663.5	--
-4108.33	--
-2553.83	--
-4663.5	--
-4145.33	--
-2590.83	--
-2553.83	--
-2553.83	--
-2590.83	--
-4145.33	--
-4145.33	--
-2535.33	--
-2535.33	--
-2072.67	--
-2590.83	--
-2590.83	--
-4034.33	--
-3619.8	--
-2176.3	--
-2590.83	--
-2072.67	--
-2035.67	--
-2035.67	--
-2072.83	--
-1658.3	--
-3730.8	--
-4145.33	--
-1635.93	--
-1635.93	--
-1658.13	--
-1658.13	--
-1785.83	--
-1526.75	--
-1813.58	--
-1813.58	--
-1399.05	--
-1621.13	--
-1621.13	--
-1399.05	--
-1399.05	--
-1243.6	--
-1371.3	--
-1371.3	--
-1243.6	--
-1139.97	--
-1295.42	--
-1376.85	--
-1117.77	--
-962.31	--
-1221.39	--
-1295.42	--
-962.381	--
-872.5	--
-1050.09	--
-1139.97	--
-906.792	--
-1010.42	--
-1050.09	--
-872.429	--
-888.286	--
-832.768	--
-906.792	--
-817.967	--
-743.943	--
-832.768	--
-734.069	--
-656.344	--
-739.186	--
-739.186	--
-755.043	--
-755.043	--
-593.536	--
-615.747	--
-615.747	--
-628.081	--
-628.081	--
-565.273	--
-615.747	--
-615.747	--
-565.273	--
-541.761	--
-541.761	--
-555.182	--
-617.99	--
-584.598	--
-550.054	--
-593.536	--
-513.252	--
-547.83	--
-634.429	--
	--
	--
	--
	--
	--
	--
	--
	--
	--
	--
	--
	--
	--
	--
	--
	--
	--
	--
	--
	--
	--
	--
	--
	--
	--
	--
	--
	--
	--
	--
	--
	--
	--
	--
	--
	--
	--
	--
	--
	--
	--
	--
	--
	--
	--
	--
	--
	--
	--
	--
	--
	--
	--
	--
	--
	--
	--
	--
	--
	--
	--
	--
	--
	--
	--
	--
	--
	--
	--
	--
	--
	--
	--
	--
	--
	--
	--
	--
	--
	--
	--
	--
	--
	--
	--
	--
	--
	--
	--
	--
	--
	--
	--
	--
	--
	--
	--
	--
	--
	--
	--
	--
	--
	--
	--
	--
	--
	--
	--
	--
	--
	--
	--
	--
	--
	--
	--
	--
	--
	--
	--
	--
	--
	--
	--
	--
	--
	--
	--
	--
	--
	--
	--
	--
	--
	--
	--
	--
	--
	--
	--
	--
	--
	--
	--
	--
	--
	--
	--
	--
	--
	--
	--
	--
	--
	--
	--
	--
	--
	--
	--
	--
	--
	--
	--
	--
	--
	--
	--
	--
	--
	--
	--
	--
	--
	--
	--
	--
	--
	--
	--
	--
	--
	--
	--
	--
	--
	--
	--
	--
	--
	--
	--
	--
	--
	--
	--
	--
	--
	--
	--
	--
	--
	--
	--
	--
	--
	--
	--
	--
	--
	--
	--
	--
	--
	--
	--
	--
	--
	--
	--
	--
	--
	--
	--
	--
	--
	--
	--
	--
	--
	--
	--
	--
	--
	--
	--
	--
	--
	--
	--
	--
	--
	--
	--
	--
	--
	--
	--
	--
	--
	--
	--
	--
	--
	--
	--
	--
	--
	--
	--
	--
	--
	--
	--
	--
	--
	--
	--
	--
	--
	--
	--
	--
	--
	--
	--
	--
	--
	--
	--
	--
	--
	--
	--
	--
	--
	--
	--
	--
	--
	--
	--
	--
	--
	--
	--
	--
	--
	--
	--
	--
	--
	--
	--
	--
	--
	--
	--
	--
	--
	--
	--
	--
	--
	--
	--
	--
	--
	--
	--
	--
	--
	--
	--
	--
	--
	--
	--
	--
	--
	--
	--
	--
	--
	--
	--
	--
	--
	--
	--
	--
	--
	--
	--
	--
	--
	--
	--
	--
	--
	--
	--
	--
	--
	--
	--
	--
	--
	--
	--
	--
	--
	--
	--
	--
	--
	--
	--
	--
	--
	--
	--
	--
	--
	--
	--
	--
	--
	--
	--
	--
	--
	--
	--
	--
	--
	--
	--
	--
	--
	--
	--
	--
	--
	--
	--
	--
	--
	--
	--
	--
	--
	--
	--
	--
	--
	--
	--
	--
	--
	--
	--
	--
	--
	--
	--
	--
	--
	--
	--
	--
	--
	--
	--
	--
	--
	--
	--
	--
	--
	--
	--
	--
	--
	--
	--
	--
	--
	--
	--
	--
	--
	--
	--
	--
	--
	--
	--
	--
	--
	--
	--
	--
	--
	--
	--
	--
	--
	--
	--
	--
	--
	--
	--
	--
	--
	--
	--
	--
	--
	--
	--
	--
	--
	--
	--
	--
	--
	--
	--
	--
	--
	--
	--
	--
	--
	--
	--
	--
	--
	--
	--
	--
	--
	--
	--
	--
	--
	--
	--
	--
	--
	--
	--
	--
	--
	--
	--
	--
	--
	--
	--
	--
	--
	--
	--
	--
	--
	--
	--
	--
	--
	--
	--
	--
	--
	--
	--
	--
	--
	--
	--
	--
	--
	--
	--
	--
	--
	--
	--
	--
	--
	--
	--
	--
	--
	--
	--
	--
	--
	--
	--
	--
	--
	--
	--
	--
	--
	--
	--
	--
	--
	--
	--
	--
	--
	--
	--
	--
	--
	--
	--
	--
	--
	--
	--
	--
	--
	--
	--
	--
	--
	--
	--
	--
	--
	--
	--
	--
	--
	--
	--
	--
	--
	--
	--
	--
	--
	--
	--
	--
	--
	--
	--
	--
	--
	--
	--
	--
	--
	--
	--
	--
	--
	--
	--
	--
	--
	--
	--
	--
	--
	--
	--
	--
	--
	--
	--
	--
	--
	--
	--
	--
	--
	--
	--
	--
	--
	--
	--
	--
	--
	--
	--
	--
	--
	--
	--
	--
	--
	--
	--
	--
	--
	--
	--
	--
	--
	--
	--
	--
	--
	--
	--
	--
	--
	--
	--
	--
	--
	--
	--
	--
	--
	--
	--
	--
	--
	--
	--
	--
	--
	--
	--
	--
	--
	--
	--
	--
	--
	--
	--
	--
	--
	--
	--
	--
	--
	--
	--
	--
	--
	--
	--
	--
	--
	--
	--
	--
	--
	--
	--
	--
	--
	--
	--
	--
	--
	--
	--
	--
	--
	--
	--
	--
	--
	--
	--
	--
	--
	--
	--
	--
	--
	--
	--
	--
	--
	--
	--
	--
	--
	--
	--
	--
	--
	--
	--
	--
	--
	--
	--
	--
	--
	--
	--
	--
	--
	--
	--
	--
	--
	--
	--
	--
	--
	--
	--
	--
	--
	--
	--
	--
	--
	--
	--
	--
	--
	--
	--
	--
	--
	--
	--
	--
	--
	--
	--
	--
	--
	--
	--
	--
	--
	--
	--
	--
	--
	--
	--
	--
	--
	--
	--
	--
	--
	--
	--
	--
	--
	--
	--
	--
	--
	--
	--
	--
	--
	--
	--
	--
	--
	--
	--
	--
	--
	--
	--
	--
	--
	--
	--
	--
	--
	--
	--
	--
	--
	--
	--
	--
	--
	--
	--
	--
	--
	--
	--
	--
	--
	--
	--
	--
	--
	--
	--
	--
	--
	--
	--
	--
	--
	--
	--
	--
	--
	--
	--
	--
	--
	--
	--
	--
	--
	--
	--
	--
	--
	--
	--
	--
	--
	--
	--
	--
	--
	--
	--
	--
	--
	--
	--
	--
	--

## Sheet: 2e
delithiation
capacity	voltage
0	0.3671
0.2	0.3723
0.5	0.3776
0.8	0.3829
1.2	0.3881
1.6	0.3934
2	0.3987
2.3	0.404
2.7	0.4092
3	0.4145
3.4	0.4198
3.7	0.425
4.1	0.4303
4.4	0.4356
4.7	0.4408
5	0.4461
5.3	0.4514
5.7	0.4567
6	0.4619
6.3	0.4672
6.6	0.4725
6.9	0.4777
7.1	0.483
7.4	0.4883
7.7	0.4936
8	0.4988
8.2	0.5041
8.5	0.5094
8.8	0.5146
9	0.5199
9.3	0.5252
9.5	0.5304
9.7	0.5357
10	0.541
10.2	0.5463
10.5	0.5515
10.7	0.5568
10.9	0.5621
11.1	0.5673
11.3	0.5726
11.6	0.5779
11.8	0.5831
12	0.5884
12.2	0.5937
12.4	0.599
12.6	0.6042
12.8	0.6095
13	0.6148
13.2	0.62
13.3	0.6253
13.5	0.6306
13.7	0.6359
13.9	0.6411
14.1	0.6464
14.3	0.6517
14.4	0.6569
14.6	0.6622
14.8	0.6675
14.9	0.6727
15.1	0.678
15.3	0.6833
15.4	0.6886
15.6	0.6938
15.8	0.6991
15.9	0.7044
16.1	0.7096
16.2	0.7149
16.4	0.7202
16.5	0.7254
16.7	0.7307
16.8	0.736
16.9	0.7413
17.1	0.7465
17.2	0.7518
17.4	0.7571
17.5	0.7623
17.6	0.7676
17.8	0.7729
17.9	0.7781
18	0.7834
18.2	0.7887
18.3	0.794
18.4	0.7992
18.6	0.8045
18.7	0.8098
18.8	0.815
19	0.8203
19.1	0.8256
19.2	0.8309
19.3	0.8361
19.5	0.8414
19.6	0.8467
19.7	0.8519
19.8	0.8572
20	0.8625
20.1	0.8677
20.2	0.873
20.3	0.8783
20.4	0.8836
20.6	0.8888
20.7	0.8941
20.8	0.8994
20.9	0.9046
21	0.9099
21.2	0.9152
21.3	0.9204
21.4	0.9257
21.5	0.931
21.6	0.9363
21.7	0.9415
21.8	0.9468
21.9	0.9521
22.1	0.9573
22.2	0.9626
22.3	0.9682
22.4	0.9735
22.5	0.9787
22.6	0.984
22.7	0.9893
22.8	0.9945
22.9	0.9998
23	1.0001

## Sheet: 2f
Gr							30preGr
1st		3rd		5th			1st		3rd		5th
2	0.0587	2	0.0449	2	0.0589		0.419	-0.00467	2	0.039	2	0.0341
1.999	0.0456	1.999	0.0427	1.999	0.0566		0.418	-0.00809	1.999	0.0365	1.999	0.0316
1.998	0.0384	1.998	0.0415	1.998	0.0555		0.417	-0.0113	1.998	0.0352	1.998	0.0304
1.997	0.0336	1.997	0.0404	1.997	0.0546		0.416	-0.0144	1.997	0.0342	1.997	0.0295
1.996	0.0302	1.996	0.0396	1.996	0.0538		0.415	-0.0175	1.996	0.0332	1.996	0.0286
1.995	0.0276	1.995	0.0387	1.995	0.053		0.414	-0.0204	1.995	0.0324	1.995	0.0279
1.994	0.0254	1.994	0.038	1.994	0.0522		0.413	-0.0234	1.994	0.0316	1.994	0.0271
1.993	0.0237	1.993	0.0372	1.993	0.0515		0.412	-0.0262	1.993	0.0308	1.993	0.0265
1.992	0.0221	1.992	0.0365	1.992	0.0509		0.411	-0.0288	1.992	0.0301	1.992	0.0258
1.991	0.0207	1.991	0.0358	1.991	0.0502		0.41	-0.0316	1.991	0.0295	1.991	0.0251
1.99	0.0195	1.99	0.0352	1.99	0.0497		0.409	-0.0344	1.99	0.0287	1.99	0.0245
1.989	0.0184	1.989	0.0346	1.989	0.0491		0.408	-0.0371	1.989	0.0282	1.989	0.024
1.988	0.0174	1.988	0.034	1.988	0.0485		0.407	-0.0397	1.988	0.0275	1.988	0.0235
1.987	0.0166	1.987	0.0334	1.987	0.048		0.406	-0.0422	1.987	0.0271	1.987	0.023
1.986	0.0158	1.986	0.0328	1.986	0.0475		0.405	-0.0447	1.986	0.0264	1.986	0.0225
1.985	0.015	1.985	0.0323	1.985	0.047		0.404	-0.0472	1.985	0.0259	1.985	0.022
1.984	0.0142	1.984	0.0318	1.984	0.0466		0.403	-0.0497	1.984	0.0254	1.984	0.0216
1.983	0.0136	1.983	0.0312	1.983	0.0461		0.402	-0.0521	1.983	0.025	1.983	0.0212
1.982	0.013	1.982	0.0308	1.982	0.0456		0.401	-0.0545	1.982	0.0245	1.982	0.0208
1.981	0.0125	1.981	0.0303	1.981	0.0452		0.4	-0.0568	1.981	0.0241	1.981	0.0204
1.98	0.0119	1.98	0.0298	1.98	0.0448		0.399	-0.0591	1.98	0.0236	1.98	0.02
1.979	0.0114	1.979	0.0294	1.979	0.0444		0.398	-0.0615	1.979	0.0233	1.979	0.0196
1.978	0.011	1.978	0.029	1.978	0.0439		0.397	-0.0637	1.978	0.0228	1.978	0.0192
1.977	0.0106	1.977	0.0285	1.977	0.0436		0.396	-0.066	1.977	0.0224	1.977	0.019
1.976	0.0101	1.976	0.0281	1.976	0.0432		0.395	-0.0681	1.976	0.0221	1.976	0.0186
1.975	0.0098	1.975	0.0277	1.975	0.0427		0.394	-0.0703	1.975	0.0217	1.975	0.0182
1.974	0.0092	1.974	0.0273	1.974	0.0424		0.393	-0.0725	1.974	0.0213	1.974	0.018
1.973	0.0088	1.973	0.027	1.973	0.0421		0.392	-0.0746	1.973	0.021	1.973	0.0177
1.972	0.0085	1.972	0.0265	1.972	0.0416		0.391	-0.0767	1.972	0.0206	1.972	0.0174
1.971	0.0082	1.971	0.0262	1.971	0.0414		0.39	-0.0788	1.971	0.0203	1.971	0.0171
1.97	0.0079	1.97	0.0258	1.97	0.041		0.389	-0.0808	1.97	0.02	1.97	0.0168
1.969	0.0076	1.969	0.0254	1.969	0.0406		0.388	-0.0829	1.969	0.0197	1.969	0.0165
1.968	0.0073	1.968	0.0251	1.968	0.0403		0.387	-0.0849	1.968	0.0194	1.968	0.0163
1.967	0.007	1.967	0.0247	1.967	0.0399		0.386	-0.0869	1.967	0.019	1.967	0.016
1.966	0.0068	1.966	0.0244	1.966	0.0397		0.385	-0.0888	1.966	0.0188	1.966	0.0157
1.965	0.0065	1.965	0.0241	1.965	0.0394		0.384	-0.0908	1.965	0.0185	1.965	0.0155
1.964	0.0062	1.964	0.0238	1.964	0.039		0.383	-0.0928	1.964	0.0183	1.964	0.0153
1.963	0.006	1.963	0.0234	1.963	0.0389		0.382	-0.0947	1.963	0.018	1.963	0.015
1.962	0.0058	1.962	0.0232	1.962	0.0385		0.381	-0.0966	1.962	0.0178	1.962	0.0148
1.961	0.0056	1.961	0.0229	1.961	0.0382		0.38	-0.0985	1.961	0.0174	1.961	0.0146
1.96	0.0054	1.96	0.0225	1.96	0.038		0.379	-0.1	1.96	0.0173	1.96	0.0145
1.959	0.0051	1.959	0.0222	1.959	0.0376		0.378	-0.102	1.959	0.017	1.959	0.0142
1.958	0.0049	1.958	0.0219	1.958	0.0374		0.377	-0.104	1.958	0.0168	1.958	0.0139
1.957	0.0048	1.957	0.0217	1.957	0.037		0.376	-0.106	1.957	0.0166	1.957	0.0138
1.956	0.0046	1.956	0.0214	1.956	0.0368		0.375	-0.108	1.956	0.0163	1.956	0.0135
1.955	0.0044	1.955	0.0211	1.955	0.0366		0.374	-0.109	1.955	0.0161	1.955	0.0134
1.954	0.0042	1.954	0.0209	1.954	0.0362		0.373	-0.111	1.954	0.0158	1.954	0.0132
1.953	0.0041	1.953	0.0206	1.953	0.036		0.372	-0.113	1.953	0.0157	1.953	0.013
1.952	0.0039	1.952	0.0203	1.952	0.0358		0.371	-0.115	1.952	0.0155	1.952	0.0127
1.951	0.0037	1.951	0.02	1.951	0.0355		0.37	-0.117	1.951	0.0153	1.951	0.0126
1.95	0.0036	1.95	0.0198	1.95	0.0352		0.369	-0.118	1.95	0.0151	1.95	0.0124
1.949	0.0035	1.949	0.0196	1.949	0.035		0.368	-0.12	1.949	0.0149	1.949	0.0121
1.948	0.0033	1.948	0.0193	1.948	0.0347		0.367	-0.122	1.948	0.0147	1.948	0.0119
1.947	0.0032	1.947	0.019	1.947	0.0345		0.366	-0.124	1.947	0.0145	1.947	0.0118
1.946	0.0031	1.946	0.0188	1.946	0.0342		0.365	-0.125	1.946	0.0143	1.946	0.0116
1.945	0.0029	1.945	0.0186	1.945	0.034		0.364	-0.127	1.945	0.0141	1.945	0.0115
1.944	0.0028	1.944	0.0184	1.944	0.0338		0.363	-0.129	1.944	0.014	1.944	0.0113
1.943	0.0027	1.943	0.0182	1.943	0.0335		0.362	-0.13	1.943	0.0138	1.943	0.0112
1.942	0.0026	1.942	0.0179	1.942	0.0333		0.361	-0.132	1.942	0.0136	1.942	0.011
1.941	0.0024	1.941	0.0177	1.941	0.0331		0.36	-0.134	1.941	0.0135	1.941	0.0109
1.94	0.0024	1.94	0.0174	1.94	0.0328		0.359	-0.135	1.94	0.0132	1.94	0.0107
1.939	0.0022	1.939	0.0173	1.939	0.0326		0.358	-0.137	1.939	0.0132	1.939	0.0106
1.938	0.0021	1.938	0.017	1.938	0.0325		0.357	-0.138	1.938	0.013	1.938	0.0104
1.937	0.002	1.937	0.0168	1.937	0.0322		0.356	-0.14	1.937	0.0128	1.937	0.0103
1.936	0.002	1.936	0.0166	1.936	0.032		0.355	-0.142	1.936	0.0127	1.936	0.0102
1.935	0.0018	1.935	0.0165	1.935	0.0318		0.354	-0.143	1.935	0.0125	1.935	0.01
1.934	0.0018	1.934	0.0162	1.934	0.0316		0.353	-0.145	1.934	0.0122	1.934	0.00986
1.933	0.0017	1.933	0.016	1.933	0.0314		0.352	-0.146	1.933	0.0121	1.933	0.00982
1.932	0.0016	1.932	0.0158	1.932	0.0311		0.351	-0.148	1.932	0.0119	1.932	0.0096
1.931	0.0015	1.931	0.0156	1.931	0.0309		0.35	-0.15	1.931	0.0118	1.931	0.00952
1.93	0.0014	1.93	0.0154	1.93	0.0306		0.349	-0.151	1.93	0.0116	1.93	0.0094
1.929	0.0014	1.929	0.0153	1.929	0.0305		0.348	-0.153	1.929	0.0115	1.929	0.00929
1.928	0.0013	1.928	0.0151	1.928	0.0303		0.347	-0.154	1.928	0.0114	1.928	0.00921
1.927	0.0012	1.927	0.0149	1.927	0.0301		0.346	-0.156	1.927	0.0112	1.927	0.00906
1.926	0.0012	1.926	0.0146	1.926	0.0299		0.345	-0.157	1.926	0.0111	1.926	0.0089
1.925	0.0011	1.925	0.0146	1.925	0.0297		0.344	-0.159	1.925	0.011	1.925	0.00881
1.924	0.001	1.924	0.0143	1.924	0.0295		0.343	-0.16	1.924	0.0108	1.924	0.00866
1.923	0.001	1.923	0.0142	1.923	0.0293		0.342	-0.162	1.923	0.0107	1.923	0.00861
1.922	0.0009	1.922	0.014	1.922	0.029		0.341	-0.163	1.922	0.0106	1.922	0.00848
1.921	0.0008	1.921	0.0138	1.921	0.0288		0.34	-0.165	1.921	0.0105	1.921	0.00832
1.92	0.0008	1.92	0.0137	1.92	0.0286		0.339	-0.166	1.92	0.0104	1.92	0.00833
1.919	0.0007	1.919	0.0134	1.919	0.0285		0.338	-0.168	1.919	0.0102	1.919	0.00813
1.918	0.0006	1.918	0.0134	1.918	0.0283		0.337	-0.169	1.918	0.0102	1.918	0.00809
1.917	0.0006	1.917	0.0132	1.917	0.0281		0.336	-0.171	1.917	0.01	1.917	0.008
1.916	0.0005	1.916	0.013	1.916	0.0279		0.335	-0.172	1.916	0.0099	1.916	0.00787
1.915	0.0005	1.915	0.0128	1.915	0.0277		0.334	-0.174	1.915	0.00974	1.915	0.00778
1.914	0.0004	1.914	0.0127	1.914	0.0275		0.333	-0.175	1.914	0.00968	1.914	0.00766
1.913	0.0004	1.913	0.0125	1.913	0.0273		0.332	-0.177	1.913	0.0095	1.913	0.00757
1.912	0.0003	1.912	0.0124	1.912	0.0272		0.331	-0.178	1.912	0.00948	1.912	0.0075
1.911	0.0003	1.911	0.0122	1.911	0.0269		0.33	-0.179	1.911	0.00934	1.911	0.00739
1.91	0.0002	1.91	0.0121	1.91	0.0267		0.329	-0.181	1.91	0.00922	1.91	0.00726
1.909	0.0002	1.909	0.0119	1.909	0.0265		0.328	-0.182	1.909	0.00912	1.909	0.00719
1.908	0.0002	1.908	0.0118	1.908	0.0263		0.327	-0.184	1.908	0.00904	1.908	0.00712
1.907	0.0001	1.907	0.0116	1.907	0.0262		0.326	-0.185	1.907	0.00888	1.907	0.00705
1.906	0.0001	1.906	0.0114	1.906	0.026		0.325	-0.187	1.906	0.00884	1.906	0.00694
1.905	0	1.905	0.0114	1.905	0.0258		0.324	-0.188	1.905	0.0087	1.905	0.0069
1.904	0	1.904	0.0112	1.904	0.0256		0.323	-0.189	1.904	0.00869	1.904	0.00675
1.903	-0.0001	1.903	0.011	1.903	0.0254		0.322	-0.191	1.903	0.00854	1.903	0.00667
1.902	-0.0001	1.902	0.0109	1.902	0.0253		0.321	-0.192	1.902	0.00839	1.902	0.0066
1.901	-0.0001	1.901	0.0108	1.901	0.0251		0.32	-0.194	1.901	0.00834	1.901	0.00649
1.9	-0.0001	1.9	0.0106	1.9	0.0249		0.319	-0.195	1.9	0.00824	1.9	0.00648
1.899	-0.0002	1.899	0.0105	1.899	0.0247		0.318	-0.196	1.899	0.00813	1.899	0.00642
1.898	-0.0003	1.898	0.0104	1.898	0.0246		0.317	-0.198	1.898	0.00811	1.898	0.00621
1.897	-0.0003	1.897	0.0102	1.897	0.0243		0.316	-0.199	1.897	0.00797	1.897	0.00624
1.896	-0.0003	1.896	0.0102	1.896	0.0242		0.315	-0.2	1.896	0.0079	1.896	0.00608
1.895	-0.0003	1.895	0.01	1.895	0.0239		0.314	-0.202	1.895	0.00777	1.895	0.00603
1.894	-0.0004	1.894	0.0098	1.894	0.0238		0.313	-0.203	1.894	0.00767	1.894	0.00594
1.893	-0.0004	1.893	0.0098	1.893	0.0237		0.312	-0.205	1.893	0.00758	1.893	0.00587
1.892	-0.0004	1.892	0.0095	1.892	0.0235		0.311	-0.206	1.892	0.00752	1.892	0.00587
1.891	-0.0004	1.891	0.0094	1.891	0.0233		0.31	-0.207	1.891	0.00746	1.891	0.00575
1.89	-0.0005	1.89	0.0093	1.89	0.0231		0.309	-0.209	1.89	0.00737	1.89	0.00567
1.889	-0.0005	1.889	0.0091	1.889	0.023		0.308	-0.21	1.889	0.00725	1.889	0.00557
1.888	-0.0005	1.888	0.009	1.888	0.0228		0.307	-0.211	1.888	0.0072	1.888	0.00547
1.887	-0.0006	1.887	0.0089	1.887	0.0226		0.306	-0.213	1.887	0.0071	1.887	0.00539
1.886	-0.0006	1.886	0.0087	1.886	0.0224		0.305	-0.214	1.886	0.007	1.886	0.00537
1.885	-0.0006	1.885	0.0086	1.885	0.0222		0.304	-0.215	1.885	0.00696	1.885	0.0053
1.884	-0.0006	1.884	0.0086	1.884	0.0221		0.303	-0.217	1.884	0.00685	1.884	0.00518
1.883	-0.0007	1.883	0.0084	1.883	0.022		0.302	-0.218	1.883	0.00683	1.883	0.00516
1.882	-0.0007	1.882	0.0082	1.882	0.0217		0.301	-0.219	1.882	0.0067	1.882	0.00509
1.881	-0.0007	1.881	0.0082	1.881	0.0216		0.3	-0.221	1.881	0.00663	1.881	0.00499
1.88	-0.0008	1.88	0.0081	1.88	0.0214		0.299	-0.222	1.88	0.00658	1.88	0.00498
1.879	-0.0007	1.879	0.008	1.879	0.0213		0.298	-0.223	1.879	0.00643	1.879	0.00489
1.878	-0.0008	1.878	0.0078	1.878	0.021		0.297	-0.225	1.878	0.00641	1.878	0.0048
1.877	-0.0008	1.877	0.0078	1.877	0.0209		0.296	-0.226	1.877	0.00633	1.877	0.00471
1.876	-0.0008	1.876	0.0077	1.876	0.0207		0.295	-0.227	1.876	0.00625	1.876	0.00465
1.875	-0.0008	1.875	0.0075	1.875	0.0206		0.294	-0.229	1.875	0.00616	1.875	0.0046
1.874	-0.0009	1.874	0.0074	1.874	0.0204		0.293	-0.23	1.874	0.00615	1.874	0.00457
1.873	-0.0009	1.873	0.0073	1.873	0.0202		0.292	-0.231	1.873	0.00605	1.873	0.00451
1.872	-0.0009	1.872	0.0073	1.872	0.0201		0.291	-0.233	1.872	0.00598	1.872	0.00442
1.871	-0.001	1.871	0.0071	1.871	0.0199		0.29	-0.234	1.871	0.00585	1.871	0.00437
1.87	-0.001	1.87	0.0071	1.87	0.0198		0.289	-0.235	1.87	0.00585	1.87	0.00433
1.869	-0.001	1.869	0.0069	1.869	0.0196		0.288	-0.237	1.869	0.00576	1.869	0.00424
1.868	-0.001	1.868	0.0068	1.868	0.0194		0.287	-0.238	1.868	0.00568	1.868	0.00416
1.867	-0.001	1.867	0.0067	1.867	0.0193		0.286	-0.239	1.867	0.00558	1.867	0.00416
1.866	-0.001	1.866	0.0066	1.866	0.0191		0.285	-0.241	1.866	0.00555	1.866	0.00401
1.865	-0.0011	1.865	0.0065	1.865	0.019		0.284	-0.242	1.865	0.00548	1.865	0.00403
1.864	-0.0011	1.864	0.0065	1.864	0.0187		0.283	-0.243	1.864	0.0054	1.864	0.00396
1.863	-0.0011	1.863	0.0063	1.863	0.0186		0.282	-0.244	1.863	0.00532	1.863	0.0039
1.862	-0.0011	1.862	0.0062	1.862	0.0185		0.281	-0.246	1.862	0.0053	1.862	0.00381
1.861	-0.0011	1.861	0.0062	1.861	0.0183		0.28	-0.247	1.861	0.00521	1.861	0.00382
1.86	-0.0012	1.86	0.0061	1.86	0.0181		0.279	-0.248	1.86	0.00515	1.86	0.00373
1.859	-0.0012	1.859	0.0059	1.859	0.018		0.278	-0.25	1.859	0.00507	1.859	0.00364
1.858	-0.0012	1.858	0.0059	1.858	0.0178		0.277	-0.251	1.858	0.00502	1.858	0.00356
1.857	-0.0012	1.857	0.0057	1.857	0.0176		0.276	-0.252	1.857	0.00497	1.857	0.00354
1.856	-0.0012	1.856	0.0058	1.856	0.0175		0.275	-0.254	1.856	0.00487	1.856	0.0035
1.855	-0.0012	1.855	0.0056	1.855	0.0173		0.274	-0.255	1.855	0.00483	1.855	0.00345
1.854	-0.0013	1.854	0.0055	1.854	0.0172		0.273	-0.256	1.854	0.00475	1.854	0.00336
1.853	-0.0013	1.853	0.0054	1.853	0.017		0.272	-0.258	1.853	0.00477	1.853	0.00335
1.852	-0.0013	1.852	0.0053	1.852	0.0169		0.271	-0.259	1.852	0.00462	1.852	0.00327
1.851	-0.0013	1.851	0.0053	1.851	0.0168		0.27	-0.26	1.851	0.00456	1.851	0.00321
1.85	-0.0014	1.85	0.0052	1.85	0.0166		0.269	-0.261	1.85	0.00452	1.85	0.00318
1.849	-0.0013	1.849	0.0051	1.849	0.0165		0.268	-0.263	1.849	0.00447	1.849	0.00305
1.848	-0.0014	1.848	0.0051	1.848	0.0163		0.267	-0.264	1.848	0.00445	1.848	0.00308
1.847	-0.0014	1.847	0.0049	1.847	0.0161		0.266	-0.265	1.847	0.00432	1.847	0.00304
1.846	-0.0014	1.846	0.0049	1.846	0.0159		0.265	-0.267	1.846	0.00422	1.846	0.00293
1.845	-0.0014	1.845	0.0047	1.845	0.0158		0.264	-0.268	1.845	0.00427	1.845	0.00292
1.844	-0.0014	1.844	0.0047	1.844	0.0157		0.263	-0.268	1.844	0.00416	1.844	0.00285
1.843	-0.0015	1.843	0.0046	1.843	0.0155		0.262	-0.269	1.843	0.00408	1.843	0.00278
1.842	-0.0015	1.842	0.0046	1.842	0.0154		0.261	-0.27	1.842	0.00408	1.842	0.00278
1.841	-0.0015	1.841	0.0045	1.841	0.0152		0.26	-0.271	1.841	0.00401	1.841	0.00269
1.84	-0.0015	1.84	0.0044	1.84	0.0151		0.259	-0.273	1.84	0.00396	1.84	0.00269
1.839	-0.0015	1.839	0.0043	1.839	0.0149		0.258	-0.274	1.839	0.00389	1.839	0.0026
1.838	-0.0015	1.838	0.0042	1.838	0.0148		0.257	-0.275	1.838	0.00384	1.838	0.00256
1.837	-0.0016	1.837	0.0042	1.837	0.0146		0.256	-0.277	1.837	0.0038	1.837	0.0025
1.836	-0.0015	1.836	0.004	1.836	0.0145		0.255	-0.278	1.836	0.0037	1.836	0.00243
1.835	-0.0016	1.835	0.004	1.835	0.0143		0.254	-0.28	1.835	0.00368	1.835	0.00245
1.834	-0.0016	1.834	0.004	1.834	0.0142		0.253	-0.281	1.834	0.00361	1.834	0.0024
1.833	-0.0016	1.833	0.0039	1.833	0.014		0.252	-0.282	1.833	0.00355	1.833	0.00231
1.832	-0.0016	1.832	0.0038	1.832	0.0139		0.251	-0.283	1.832	0.00357	1.832	0.0023
1.831	-0.0017	1.831	0.0037	1.831	0.0138		0.25	-0.285	1.831	0.00349	1.831	0.0022
1.83	-0.0016	1.83	0.0037	1.83	0.0136		0.249	-0.286	1.83	0.00338	1.83	0.00218
1.829	-0.0017	1.829	0.0036	1.829	0.0135		0.248	-0.287	1.829	0.00336	1.829	0.00215
1.828	-0.0017	1.828	0.0035	1.828	0.0134		0.247	-0.289	1.828	0.00328	1.828	0.00204
1.827	-0.0017	1.827	0.0035	1.827	0.0132		0.246	-0.29	1.827	0.00327	1.827	0.00205
1.826	-0.0017	1.826	0.0034	1.826	0.0131		0.245	-0.291	1.826	0.00319	1.826	0.00202
1.825	-0.0018	1.825	0.0033	1.825	0.0129		0.244	-0.293	1.825	0.00315	1.825	0.00193
1.824	-0.0017	1.824	0.0032	1.824	0.0128		0.243	-0.294	1.824	0.00309	1.824	0.0019
1.823	-0.0018	1.823	0.0031	1.823	0.0126		0.242	-0.295	1.823	0.00302	1.823	0.00184
1.822	-0.0018	1.822	0.0031	1.822	0.0125		0.241	-0.297	1.822	0.003	1.822	0.00181
1.821	-0.0018	1.821	0.003	1.821	0.0124		0.24	-0.298	1.821	0.00291	1.821	0.00181
1.82	-0.0018	1.82	0.003	1.82	0.0122		0.239	-0.299	1.82	0.00287	1.82	0.00176
1.819	-0.0018	1.819	0.0029	1.819	0.0121		0.238	-0.3	1.819	0.00286	1.819	0.0017
1.818	-0.0019	1.818	0.0029	1.818	0.012		0.237	-0.302	1.818	0.00278	1.818	0.00161
1.817	-0.0019	1.817	0.0028	1.817	0.0118		0.236	-0.303	1.817	0.00272	1.817	0.00157
1.816	-0.0019	1.816	0.0027	1.816	0.0118		0.235	-0.305	1.816	0.00269	1.816	0.00159
1.815	-0.0019	1.815	0.0027	1.815	0.0116		0.234	-0.306	1.815	0.00269	1.815	0.00154
1.814	-0.0019	1.814	0.0026	1.814	0.0114		0.233	-0.307	1.814	0.00255	1.814	0.00151
1.813	-0.0019	1.813	0.0025	1.813	0.0114		0.232	-0.309	1.813	0.00265	1.813	0.00145
1.812	-0.002	1.812	0.0024	1.812	0.0112		0.231	-0.31	1.812	0.00254	1.812	0.00136
1.811	-0.0019	1.811	0.0024	1.811	0.011		0.23	-0.311	1.811	0.00272	1.811	0.00132
1.81	-0.002	1.81	0.0023	1.81	0.011		0.229	-0.312	1.81	0.00261	1.81	0.00132
1.809	-0.002	1.809	0.0023	1.809	0.0109		0.228	-0.314	1.809	0.0024	1.809	0.00125
1.808	-0.002	1.808	0.0022	1.808	0.0108		0.227	-0.315	1.808	0.00251	1.808	0.00125
1.807	-0.002	1.807	0.0021	1.807	0.0106		0.226	-0.316	1.807	0.0024	1.807	0.00118
1.806	-0.002	1.806	0.0021	1.806	0.0104		0.225	-0.318	1.806	0.00236	1.806	0.00111
1.805	-0.002	1.805	0.002	1.805	0.0103		0.224	-0.319	1.805	0.00225	1.805	0.00113
1.804	-0.0021	1.804	0.002	1.804	0.0102		0.223	-0.321	1.804	0.00211	1.804	0.00105
1.803	-0.002	1.803	0.0019	1.803	0.0101		0.222	-0.322	1.803	0.00211	1.803	0.000983
1.802	-0.0021	1.802	0.0019	1.802	0.01		0.221	-0.323	1.802	0.00207	1.802	0.00101
1.801	-0.0021	1.801	0.0018	1.801	0.0098		0.22	-0.325	1.801	0.002	1.801	0.000886
1.8	-0.0021	1.8	0.0018	1.8	0.0098		0.219	-0.326	1.8	0.00198	1.8	0.000867
1.799	-0.0021	1.799	0.0017	1.799	0.0096		0.218	-0.327	1.799	0.0019	1.799	0.000862
1.798	-0.0021	1.798	0.0016	1.798	0.0093		0.217	-0.329	1.798	0.00188	1.798	0.0008
1.797	-0.0021	1.797	0.0016	1.797	0.0093		0.216	-0.33	1.797	0.00189	1.797	0.000783
1.796	-0.0022	1.796	0.0015	1.796	0.0091		0.215	-0.331	1.796	0.00177	1.796	0.000768
1.795	-0.0022	1.795	0.0015	1.795	0.009		0.214	-0.333	1.795	0.00174	1.795	0.000613
1.794	-0.0022	1.794	0.0014	1.794	0.0089		0.213	-0.334	1.794	0.00167	1.794	0.00065
1.793	-0.0022	1.793	0.0013	1.793	0.0087		0.212	-0.335	1.793	0.00167	1.793	0.000629
1.792	-0.0022	1.792	0.0013	1.792	0.0086		0.211	-0.337	1.792	0.00158	1.792	0.000568
1.791	-0.0022	1.791	0.0013	1.791	0.0086		0.21	-0.338	1.791	0.00152	1.791	0.000496
1.79	-0.0023	1.79	0.0012	1.79	0.0084		0.209	-0.34	1.79	0.00158	1.79	0.000449
1.789	-0.0022	1.789	0.0011	1.789	0.0083		0.208	-0.341	1.789	0.00146	1.789	0.000513
1.788	-0.0023	1.788	0.0011	1.788	0.0082		0.207	-0.343	1.788	0.00146	1.788	0.000411
1.787	-0.0023	1.787	0.001	1.787	0.0081		0.206	-0.344	1.787	0.00137	1.787	0.000375
1.786	-0.0023	1.786	0.001	1.786	0.0079		0.205	-0.345	1.786	0.00136	1.786	0.000401
1.785	-0.0023	1.785	0.001	1.785	0.0079		0.204	-0.347	1.785	0.0013	1.785	0.000281
1.784	-0.0024	1.784	0.0009	1.784	0.0077		0.203	-0.348	1.784	0.00126	1.784	0.000304
1.783	-0.0024	1.783	0.0009	1.783	0.0077		0.202	-0.35	1.783	0.00124	1.783	0.000224
1.782	-0.0024	1.782	0.0008	1.782	0.0076		0.201	-0.351	1.782	0.00117	1.782	0.000186
1.781	-0.0024	1.781	0.0007	1.781	0.0074		0.2	-0.352	1.781	0.00117	1.781	0.000173
1.78	-0.0024	1.78	0.0007	1.78	0.0073		0.199	-0.354	1.78	0.00109	1.78	8.83e-05
1.779	-0.0024	1.779	0.0007	1.779	0.0072		0.198	-0.355	1.779	0.00108	1.779	8.86e-05
1.778	-0.0024	1.778	0.0006	1.778	0.0071		0.197	-0.357	1.778	0.00106	1.778	5.14e-05
1.777	-0.0024	1.777	0.0006	1.777	0.007		0.196	-0.358	1.777	0.000978	1.777	-3.15e-05
1.776	-0.0024	1.776	0.0005	1.776	0.0069		0.195	-0.359	1.776	0.000956	1.776	4.35e-05
1.775	-0.0025	1.775	0.0004	1.775	0.0068		0.194	-0.361	1.775	0.000888	1.775	-2.8e-05
1.774	-0.0025	1.774	0.0004	1.774	0.0067		0.193	-0.362	1.774	0.000852	1.774	-0.000104
1.773	-0.0025	1.773	0.0004	1.773	0.0066		0.192	-0.364	1.773	0.000831	1.773	-0.000163
1.772	-0.0025	1.772	0.0003	1.772	0.0065		0.191	-0.365	1.772	0.000751	1.772	-0.000136
1.771	-0.0025	1.771	0.0003	1.771	0.0064		0.19	-0.366	1.771	0.000764	1.771	-0.000186
1.77	-0.0025	1.77	0.0002	1.77	0.0063		0.189	-0.368	1.77	0.00068	1.77	-0.000252
1.769	-0.0026	1.769	0.0002	1.769	0.0062		0.188	-0.369	1.769	0.00067	1.769	-0.000224
1.768	-0.0025	1.768	0.0001	1.768	0.0061		0.187	-0.371	1.768	0.00068	1.768	-0.000313
1.767	-0.0026	1.767	0.0001	1.767	0.006		0.186	-0.372	1.767	0.000572	1.767	-0.000322
1.766	-0.0026	1.766	0	1.766	0.0059		0.185	-0.374	1.766	0.000482	1.766	-0.000334
1.765	-0.0026	1.765	0	1.765	0.0059		0.184	-0.375	1.765	0.000561	1.765	-0.0004
1.764	-0.0026	1.764	0	1.764	0.0057		0.183	-0.377	1.764	0.000455	1.764	-0.000397
1.763	-0.0026	1.763	-0.0001	1.763	0.0056		0.182	-0.378	1.763	0.000411	1.763	-0.000474
1.762	-0.0026	1.762	-0.0001	1.762	0.0055		0.181	-0.38	1.762	0.000399	1.762	-0.000485
1.761	-0.0027	1.761	-0.0002	1.761	0.0055		0.18	-0.381	1.761	0.00034	1.761	-0.000542
1.76	-0.0026	1.76	-0.0002	1.76	0.0054		0.179	-0.383	1.76	0.00037	1.76	-0.000586
1.759	-0.0027	1.759	-0.0003	1.759	0.0052		0.178	-0.384	1.759	0.000247	1.759	-0.000573
1.758	-0.0027	1.758	-0.0003	1.758	0.0051		0.177	-0.385	1.758	0.000276	1.758	-0.000618
1.757	-0.0027	1.757	-0.0003	1.757	0.0051		0.176	-0.387	1.757	0.000251	1.757	-0.00064
1.756	-0.0028	1.756	-0.0004	1.756	0.005		0.175	-0.389	1.756	0.000141	1.756	-0.000703
1.755	-0.0028	1.755	-0.0005	1.755	0.0049		0.174	-0.39	1.755	0.00018	1.755	-0.000724
1.754	-0.0028	1.754	-0.0005	1.754	0.0048		0.173	-0.392	1.754	8.45e-05	1.754	-0.000754
1.753	-0.0028	1.753	-0.0005	1.753	0.0047		0.172	-0.393	1.753	0.000109	1.753	-0.000764
1.752	-0.0028	1.752	-0.0006	1.752	0.0046		0.171	-0.395	1.752	0.000121	1.752	-0.00082
1.751	-0.0028	1.751	-0.0007	1.751	0.0045		0.17	-0.396	1.751	5.35e-05	1.751	-0.000886
1.75	-0.0028	1.75	-0.0007	1.75	0.0044		0.169	-0.398	1.75	-2.72e-05	1.75	-0.000885
1.749	-0.0029	1.749	-0.0006	1.749	0.0043		0.168	-0.4	1.749	0.000118	1.749	-0.000895
1.748	-0.0029	1.748	-0.0008	1.748	0.0043		0.167	-0.401	1.748	0.000212	1.748	-0.000961
1.747	-0.0029	1.747	-0.0008	1.747	0.0042		0.166	-0.403	1.747	0.000219	1.747	-0.001
1.746	-0.003	1.746	-0.0009	1.746	0.004		0.165	-0.404	1.746	0.000803	1.746	-0.00106
1.745	-0.003	1.745	-0.0009	1.745	0.004		0.164	-0.406	1.745	-0.000117	1.745	-0.00107
1.744	-0.003	1.744	-0.0009	1.744	0.004		0.163	-0.407	1.744	-0.000273	1.744	-0.00101
1.743	-0.003	1.743	-0.0009	1.743	0.0038		0.162	-0.409	1.743	-0.000308	1.743	-0.00113
1.742	-0.0031	1.742	-0.001	1.742	0.0038		0.161	-0.41	1.742	-0.000298	1.742	-0.00113
1.741	-0.0031	1.741	-0.001	1.741	0.0036		0.16	-0.412	1.741	-0.000359	1.741	-0.00117
1.74	-0.0031	1.74	-0.0011	1.74	0.0035		0.159	-0.414	1.74	-0.000398	1.74	-0.00118
1.739	-0.0031	1.739	-0.0011	1.739	0.0036		0.158	-0.415	1.739	-0.000372	1.739	-0.00126
1.738	-0.0031	1.738	-0.0011	1.738	0.0034		0.157	-0.417	1.738	-0.000305	1.738	-0.00126
1.737	-0.0032	1.737	-0.0012	1.737	0.0034		0.156	-0.419	1.737	-0.000224	1.737	-0.00131
1.736	-0.0032	1.736	-0.0012	1.736	0.0033		0.155	-0.42	1.736	-0.000309	1.736	-0.00124
1.735	-0.0032	1.735	-0.0013	1.735	0.0032		0.154	-0.422	1.735	-2.06e-05	1.735	-0.00133
1.734	-0.0032	1.734	-0.0013	1.734	0.0031		0.153	-0.424	1.734	-0.000653	1.734	-0.00134
1.733	-0.0032	1.733	-0.0013	1.733	0.003		0.152	-0.425	1.733	-0.000626	1.733	-0.00142
1.732	-0.0033	1.732	-0.0014	1.732	0.0029		0.151	-0.427	1.732	-0.000695	1.732	-0.00148
1.731	-0.0033	1.731	-0.0014	1.731	0.0028		0.15	-0.428	1.731	-0.000748	1.731	-0.00144
1.73	-0.0033	1.73	-0.0014	1.73	0.0028		0.149	-0.43	1.73	-0.000761	1.73	-0.00151
1.729	-0.0033	1.729	-0.0015	1.729	0.0027		0.148	-0.432	1.729	-0.000842	1.729	-0.00155
1.728	-0.0033	1.728	-0.0015	1.728	0.0027		0.147	-0.434	1.728	-0.00079	1.728	-0.00154
1.727	-0.0034	1.727	-0.0016	1.727	0.0025		0.146	-0.435	1.727	-0.000874	1.727	-0.00158
1.726	-0.0034	1.726	-0.0016	1.726	0.0025		0.145	-0.437	1.726	-0.000922	1.726	-0.00159
1.725	-0.0034	1.725	-0.0016	1.725	0.0024		0.144	-0.438	1.725	-0.000958	1.725	-0.00166
1.724	-0.0034	1.724	-0.0017	1.724	0.0023		0.143	-0.44	1.724	-0.000974	1.724	-0.00167
1.723	-0.0034	1.723	-0.0017	1.723	0.0023		0.142	-0.442	1.723	-0.00103	1.723	-0.0017
1.722	-0.0034	1.722	-0.0018	1.722	0.0022		0.141	-0.444	1.722	-0.00104	1.722	-0.00176
1.721	-0.0035	1.721	-0.0018	1.721	0.0021		0.14	-0.445	1.721	-0.0011	1.721	-0.00174
1.72	-0.0035	1.72	-0.0019	1.72	0.002		0.139	-0.447	1.72	-0.00111	1.72	-0.00176
1.719	-0.0035	1.719	-0.0018	1.719	0.002		0.138	-0.449	1.719	-0.00115	1.719	-0.00184
1.718	-0.0035	1.718	-0.0019	1.718	0.0019		0.137	-0.451	1.718	-0.00119	1.718	-0.00189
1.717	-0.0035	1.717	-0.0019	1.717	0.0019		0.136	-0.452	1.717	-0.0012	1.717	-0.00185
1.716	-0.0036	1.716	-0.002	1.716	0.0018		0.135	-0.454	1.716	-0.00118	1.716	-0.00187
1.715	-0.0036	1.715	-0.002	1.715	0.0017		0.134	-0.456	1.715	-0.00131	1.715	-0.00193
1.714	-0.0036	1.714	-0.002	1.714	0.0017		0.133	-0.458	1.714	-0.00131	1.714	-0.00194
1.713	-0.0036	1.713	-0.002	1.713	0.0016		0.132	-0.46	1.713	-0.0014	1.713	-0.002
1.712	-0.0036	1.712	-0.0021	1.712	0.0015		0.131	-0.461	1.712	-0.00132	1.712	-0.00201
1.711	-0.0036	1.711	-0.0021	1.711	0.0014		0.13	-0.463	1.711	-0.00142	1.711	-0.002
1.71	-0.0036	1.71	-0.0022	1.71	0.0014		0.129	-0.465	1.71	-0.00142	1.71	-0.00204
1.709	-0.0037	1.709	-0.0022	1.709	0.0014		0.128	-0.467	1.709	-0.00147	1.709	-0.00214
1.708	-0.0037	1.708	-0.0023	1.708	0.0013		0.127	-0.469	1.708	-0.00152	1.708	-0.00217
1.707	-0.0037	1.707	-0.0022	1.707	0.0012		0.126	-0.471	1.707	-0.00152	1.707	-0.00216
1.706	-0.0037	1.706	-0.0023	1.706	0.0011		0.125	-0.472	1.706	-0.00158	1.706	-0.00217
1.705	-0.0037	1.705	-0.0024	1.705	0.001		0.124	-0.474	1.705	-0.00162	1.705	-0.00214
1.704	-0.0037	1.704	-0.0024	1.704	0.001		0.123	-0.476	1.704	-0.0016	1.704	-0.00228
1.703	-0.0037	1.703	-0.0024	1.703	0.0009		0.122	-0.478	1.703	-0.00171	1.703	-0.00225
1.702	-0.0038	1.702	-0.0024	1.702	0.0009		0.121	-0.48	1.702	-0.00166	1.702	-0.00228
1.701	-0.0038	1.701	-0.0025	1.701	0.0008		0.12	-0.482	1.701	-0.0017	1.701	-0.0023
1.7	-0.0038	1.7	-0.0025	1.7	0.0007		0.119	-0.484	1.7	-0.00177	1.7	-0.00233
1.699	-0.0038	1.699	-0.0025	1.699	0.0006		0.118	-0.486	1.699	-0.00173	1.699	-0.00237
1.698	-0.0038	1.698	-0.0026	1.698	0.0006		0.117	-0.488	1.698	-0.00182	1.698	-0.0024
1.697	-0.0038	1.697	-0.0026	1.697	0.0005		0.116	-0.49	1.697	-0.00183	1.697	-0.00242
1.696	-0.0039	1.696	-0.0026	1.696	0.0005		0.115	-0.492	1.696	-0.00184	1.696	-0.00244
1.695	-0.0039	1.695	-0.0027	1.695	0.0004		0.114	-0.494	1.695	-0.00192	1.695	-0.00248
1.694	-0.0039	1.694	-0.0027	1.694	0.0004		0.113	-0.496	1.694	-0.00194	1.694	-0.00249
1.693	-0.0039	1.693	-0.0027	1.693	0.0003		0.112	-0.498	1.693	-0.00197	1.693	-0.00248
1.692	-0.0039	1.692	-0.0028	1.692	0.0002		0.111	-0.5	1.692	-0.00199	1.692	-0.0026
1.691	-0.0039	1.691	-0.0028	1.691	0.0002		0.11	-0.502	1.691	-0.00198	1.691	-0.00259
1.69	-0.004	1.69	-0.0028	1.69	0.0001		0.109	-0.505	1.69	-0.00208	1.69	-0.00267
1.689	-0.004	1.689	-0.0029	1.689	0		0.108	-0.507	1.689	-0.00215	1.689	-0.00267
1.688	-0.004	1.688	-0.0029	1.688	0		0.107	-0.509	1.688	-0.0021	1.688	-0.00262
1.687	-0.004	1.687	-0.003	1.687	0		0.106	-0.511	1.687	-0.00217	1.687	-0.00266
1.686	-0.004	1.686	-0.0029	1.686	-0.0001		0.105	-0.513	1.686	-0.0022	1.686	-0.00274
1.685	-0.004	1.685	-0.003	1.685	-0.0001		0.104	-0.515	1.685	-0.00218	1.685	-0.00271
1.684	-0.0041	1.684	-0.003	1.684	-0.0003		0.103	-0.517	1.684	-0.00224	1.684	-0.00281
1.683	-0.0041	1.683	-0.003	1.683	-0.0002		0.102	-0.519	1.683	-0.00228	1.683	-0.0028
1.682	-0.0041	1.682	-0.0031	1.682	-0.0003		0.101	-0.522	1.682	-0.00232	1.682	-0.00279
1.681	-0.0041	1.681	-0.0031	1.681	-0.0004		0.1	-0.524	1.681	-0.00228	1.681	-0.00286
1.68	-0.0041	1.68	-0.0031	1.68	-0.0004		0.099	-0.526	1.68	-0.00238	1.68	-0.00284
1.679	-0.0042	1.679	-0.0032	1.679	-0.0005		0.098	-0.528	1.679	-0.00234	1.679	-0.00288
1.678	-0.0042	1.678	-0.0032	1.678	-0.0006		0.097	-0.531	1.678	-0.00242	1.678	-0.00298
1.677	-0.0042	1.677	-0.0032	1.677	-0.0005		0.096	-0.533	1.677	-0.00243	1.677	-0.00288
1.676	-0.0042	1.676	-0.0033	1.676	-0.0006		0.095	-0.535	1.676	-0.00251	1.676	-0.00296
1.675	-0.0042	1.675	-0.0033	1.675	-0.0007		0.094	-0.538	1.675	-0.00245	1.675	-0.00299
1.674	-0.0042	1.674	-0.0033	1.674	-0.0007		0.093	-0.54	1.674	-0.00249	1.674	-0.00302
1.673	-0.0043	1.673	-0.0033	1.673	-0.0008		0.092	-0.542	1.673	-0.0026	1.673	-0.00306
1.672	-0.0043	1.672	-0.0033	1.672	-0.0008		0.091	-0.544	1.672	-0.00258	1.672	-0.00306
1.671	-0.0043	1.671	-0.0034	1.671	-0.0009		0.09	-0.547	1.671	-0.00263	1.671	-0.00318
1.67	-0.0043	1.67	-0.0034	1.67	-0.001		0.089	-0.55	1.67	-0.00262	1.67	-0.00308
1.669	-0.0043	1.669	-0.0034	1.669	-0.0009		0.088	-0.552	1.669	-0.00261	1.669	-0.00321
1.668	-0.0044	1.668	-0.0035	1.668	-0.001		0.087	-0.554	1.668	-0.00266	1.668	-0.00318
1.667	-0.0044	1.667	-0.0035	1.667	-0.0011		0.086	-0.557	1.667	-0.00273	1.667	-0.00317
1.666	-0.0044	1.666	-0.0035	1.666	-0.0011		0.085	-0.559	1.666	-0.00277	1.666	-0.00327
1.665	-0.0045	1.665	-0.0036	1.665	-0.0012		0.084	-0.562	1.665	-0.00279	1.665	-0.00323
1.664	-0.0045	1.664	-0.0036	1.664	-0.0012		0.083	-0.564	1.664	-0.00278	1.664	-0.00332
1.663	-0.0045	1.663	-0.0037	1.663	-0.0013		0.082	-0.567	1.663	-0.00284	1.663	-0.00328
1.662	-0.0045	1.662	-0.0037	1.662	-0.0014		0.081	-0.569	1.662	-0.00289	1.662	-0.00331
1.661	-0.0045	1.661	-0.0037	1.661	-0.0014		0.08	-0.572	1.661	-0.0029	1.661	-0.00336
1.66	-0.0045	1.66	-0.0037	1.66	-0.0014		0.079	-0.575	1.66	-0.00295	1.66	-0.00338
1.659	-0.0046	1.659	-0.0038	1.659	-0.0015		0.078	-0.577	1.659	-0.00295	1.659	-0.00335
1.658	-0.0046	1.658	-0.0038	1.658	-0.0015		0.077	-0.58	1.658	-0.00298	1.658	-0.00342
1.657	-0.0046	1.657	-0.0039	1.657	-0.0016		0.076	-0.582	1.657	-0.00305	1.657	-0.00347
1.656	-0.0046	1.656	-0.0038	1.656	-0.0016		0.075	-0.585	1.656	-0.00302	1.656	-0.0035
1.655	-0.0047	1.655	-0.0039	1.655	-0.0016		0.074	-0.588	1.655	-0.00303	1.655	-0.00353
1.654	-0.0047	1.654	-0.0039	1.654	-0.0017		0.073	-0.591	1.654	-0.00311	1.654	-0.00356
1.653	-0.0047	1.653	-0.0039	1.653	-0.0017		0.072	-0.593	1.653	-0.00312	1.653	-0.00356
1.652	-0.0047	1.652	-0.004	1.652	-0.0018		0.071	-0.596	1.652	-0.00322	1.652	-0.00361
1.651	-0.0048	1.651	-0.0039	1.651	-0.0018		0.07	-0.599	1.651	-0.00317	1.651	-0.00358
1.65	-0.0048	1.65	-0.004	1.65	-0.0018		0.069	-0.602	1.65	-0.00321	1.65	-0.00364
1.649	-0.0048	1.649	-0.004	1.649	-0.0019		0.068	-0.604	1.649	-0.00326	1.649	-0.00366
1.648	-0.0048	1.648	-0.004	1.648	-0.0019		0.067	-0.607	1.648	-0.00323	1.648	-0.00364
1.647	-0.0049	1.647	-0.0041	1.647	-0.002		0.066	-0.61	1.647	-0.00333	1.647	-0.00376
1.646	-0.0049	1.646	-0.0041	1.646	-0.002		0.065	-0.613	1.646	-0.00337	1.646	-0.00374
1.645	-0.0049	1.645	-0.0042	1.645	-0.002		0.064	-0.616	1.645	-0.00332	1.645	-0.00375
1.644	-0.005	1.644	-0.0042	1.644	-0.0021		0.063	-0.619	1.644	-0.00342	1.644	-0.00383
1.643	-0.005	1.643	-0.0042	1.643	-0.0021		0.062	-0.622	1.643	-0.0034	1.643	-0.00378
1.642	-0.005	1.642	-0.0042	1.642	-0.0022		0.061	-0.625	1.642	-0.00343	1.642	-0.00384
1.641	-0.0051	1.641	-0.0042	1.641	-0.0022		0.06	-0.628	1.641	-0.0035	1.641	-0.00387
1.64	-0.0051	1.64	-0.0043	1.64	-0.0022		0.059	-0.631	1.64	-0.00348	1.64	-0.00392
1.639	-0.0051	1.639	-0.0043	1.639	-0.0024		0.058	-0.634	1.639	-0.00355	1.639	-0.00387
1.638	-0.0052	1.638	-0.0044	1.638	-0.0024		0.057	-0.638	1.638	-0.00361	1.638	-0.00399
1.637	-0.0052	1.637	-0.0044	1.637	-0.0024		0.056	-0.641	1.637	-0.00357	1.637	-0.00397
1.636	-0.0052	1.636	-0.0044	1.636	-0.0024		0.055	-0.644	1.636	-0.00363	1.636	-0.004
1.635	-0.0052	1.635	-0.0044	1.635	-0.0025		0.054	-0.647	1.635	-0.00366	1.635	-0.00403
1.634	-0.0053	1.634	-0.0045	1.634	-0.0025		0.053	-0.65	1.634	-0.00366	1.634	-0.00403
1.633	-0.0053	1.633	-0.0045	1.633	-0.0025		0.052	-0.654	1.633	-0.00371	1.633	-0.00412
1.632	-0.0053	1.632	-0.0045	1.632	-0.0026		0.051	-0.657	1.632	-0.00375	1.632	-0.00403
1.631	-0.0053	1.631	-0.0045	1.631	-0.0026		0.05	-0.66	1.631	-0.00373	1.631	-0.00412
1.63	-0.0054	1.63	-0.0046	1.63	-0.0027		0.049	-0.664	1.63	-0.00379	1.63	-0.00415
1.629	-0.0054	1.629	-0.0046	1.629	-0.0027		0.048	-0.667	1.629	-0.00384	1.629	-0.00413
1.628	-0.0055	1.628	-0.0046	1.628	-0.0027		0.047	-0.67	1.628	-0.00381	1.628	-0.00414
1.627	-0.0055	1.627	-0.0046	1.627	-0.0028		0.046	-0.674	1.627	-0.00384	1.627	-0.00422
1.626	-0.0056	1.626	-0.0047	1.626	-0.0029		0.045	-0.678	1.626	-0.00387	1.626	-0.00422
1.625	-0.0056	1.625	-0.0047	1.625	-0.0028		0.044	-0.681	1.625	-0.00396	1.625	-0.00427
1.624	-0.0056	1.624	-0.0047	1.624	-0.0029		0.043	-0.685	1.624	-0.00396	1.624	-0.00424
1.623	-0.0056	1.623	-0.0047	1.623	-0.0029		0.042	-0.689	1.623	-0.00393	1.623	-0.00436
1.622	-0.0057	1.622	-0.0048	1.622	-0.003		0.041	-0.692	1.622	-0.00402	1.622	-0.00433
1.621	-0.0057	1.621	-0.0047	1.621	-0.003		0.04	-0.696	1.621	-0.00403	1.621	-0.00433
1.62	-0.0058	1.62	-0.0048	1.62	-0.003		0.039	-0.7	1.62	-0.00407	1.62	-0.00436
1.619	-0.0058	1.619	-0.0048	1.619	-0.0031		0.038	-0.704	1.619	-0.00408	1.619	-0.0044
1.618	-0.0058	1.618	-0.0049	1.618	-0.0031		0.037	-0.708	1.618	-0.0041	1.618	-0.00443
1.617	-0.0059	1.617	-0.0049	1.617	-0.0031		0.036	-0.712	1.617	-0.00415	1.617	-0.00446
1.616	-0.0059	1.616	-0.0049	1.616	-0.0032		0.035	-0.716	1.616	-0.00418	1.616	-0.00444
1.615	-0.006	1.615	-0.005	1.615	-0.0032		0.034	-0.72	1.615	-0.00424	1.615	-0.00445
1.614	-0.006	1.614	-0.005	1.614	-0.0033		0.033	-0.724	1.614	-0.00423	1.614	-0.00453
1.613	-0.006	1.613	-0.005	1.613	-0.0032		0.032	-0.728	1.613	-0.00425	1.613	-0.00455
1.612	-0.0061	1.612	-0.0051	1.612	-0.0033		0.031	-0.732	1.612	-0.00429	1.612	-0.00458
1.611	-0.0061	1.611	-0.005	1.611	-0.0033		0.03	-0.736	1.611	-0.00427	1.611	-0.00458
1.61	-0.0062	1.61	-0.0051	1.61	-0.0034		0.029	-0.741	1.61	-0.00432	1.61	-0.00462
1.609	-0.0062	1.609	-0.0051	1.609	-0.0034		0.028	-0.745	1.609	-0.00437	1.609	-0.00465
1.608	-0.0063	1.608	-0.0051	1.608	-0.0034		0.027	-0.75	1.608	-0.00432	1.608	-0.00466
1.607	-0.0063	1.607	-0.0052	1.607	-0.0035		0.026	-0.754	1.607	-0.00444	1.607	-0.00468
1.606	-0.0064	1.606	-0.0052	1.606	-0.0035		0.025	-0.759	1.606	-0.00443	1.606	-0.00473
1.605	-0.0064	1.605	-0.0052	1.605	-0.0035		0.024	-0.763	1.605	-0.00446	1.605	-0.00471
1.604	-0.0065	1.604	-0.0052	1.604	-0.0035		0.023	-0.768	1.604	-0.00453	1.604	-0.0048
1.603	-0.0065	1.603	-0.0053	1.603	-0.0036		0.022	-0.773	1.603	-0.0045	1.603	-0.00481
1.602	-0.0066	1.602	-0.0053	1.602	-0.0037		0.021	-0.778	1.602	-0.00455	1.602	-0.00475
1.601	-0.0066	1.601	-0.0053	1.601	-0.0037		0.02	-0.783	1.601	-0.00459	1.601	-0.00484
1.6	-0.0067	1.6	-0.0053	1.6	-0.0037		0.019	-0.788	1.6	-0.00459	1.6	-0.00486
1.599	-0.0068	1.599	-0.0054	1.599	-0.0038		0.018	-0.793	1.599	-0.00461	1.599	-0.00486
1.598	-0.0068	1.598	-0.0054	1.598	-0.0038		0.017	-0.798	1.598	-0.00471	1.598	-0.00482
1.597	-0.0068	1.597	-0.0054	1.597	-0.0038		0.016	-0.803	1.597	-0.00464	1.597	-0.00489
1.596	-0.0069	1.596	-0.0054	1.596	-0.0038		0.015	-0.808	1.596	-0.00472	1.596	-0.005
1.595	-0.0069	1.595	-0.0055	1.595	-0.0039		0.014	-0.813	1.595	-0.00472	1.595	-0.00497
1.594	-0.007	1.594	-0.0055	1.594	-0.0039		0.013	-0.819	1.594	-0.00478	1.594	-0.005
1.593	-0.0071	1.593	-0.0056	1.593	-0.0039		0.012	-0.824	1.593	-0.0048	1.593	-0.00504
1.592	-0.0071	1.592	-0.0056	1.592	-0.004		0.011	-0.83	1.592	-0.00479	1.592	-0.00499
1.591	-0.0072	1.591	-0.0056	1.591	-0.004		0.01	-0.835	1.591	-0.00481	1.591	-0.00508
1.59	-0.0073	1.59	-0.0056	1.59	-0.0041		0.009	-0.841	1.59	-0.00485	1.59	-0.00511
1.589	-0.0073	1.589	-0.0056	1.589	-0.0041		0.008	-0.847	1.589	-0.00487	1.589	-0.00508
1.588	-0.0074	1.588	-0.0057	1.588	-0.0041		0.007	-0.852	1.588	-0.00496	1.588	-0.00515
1.587	-0.0074	1.587	-0.0056	1.587	-0.0042		0.006	-0.858	1.587	-0.00493	1.587	-0.00519
1.586	-0.0075	1.586	-0.0057	1.586	-0.0041		0.005	-0.864	1.586	-0.00494	1.586	-0.00515
1.585	-0.0076	1.585	-0.0057	1.585	-0.0042		0.004	-0.87	1.585	-0.00502	1.585	-0.00517
1.584	-0.0076	1.584	-0.0058	1.584	-0.0042		0.003	-0.876	1.584	-0.00505	1.584	-0.00518
1.583	-0.0077	1.583	-0.0058	1.583	-0.0042		0.002	-0.883	1.583	-0.00506	1.583	-0.00529
1.582	-0.0077	1.582	-0.0058	1.582	-0.0043		0.001	-0.888	1.582	-0.00506	1.582	-0.00526
1.581	-0.0078	1.581	-0.0058	1.581	-0.0043		0	-0.891	1.581	-0.00516	1.581	-0.00529
1.58	-0.0079	1.58	-0.0058	1.58	-0.0043		0.001	-0.883	1.58	-0.00513	1.58	-0.00531
1.579	-0.0079	1.579	-0.0059	1.579	-0.0044		0.002	-0.875	1.579	-0.00517	1.579	-0.00539
1.578	-0.008	1.578	-0.0059	1.578	-0.0044		0.003	-0.868	1.578	-0.00525	1.578	-0.00536
1.577	-0.0081	1.577	-0.0059	1.577	-0.0044		0.004	-0.86	1.577	-0.0052	1.577	-0.00542
1.576	-0.0081	1.576	-0.006	1.576	-0.0045		0.005	-0.853	1.576	-0.00521	1.576	-0.00537
1.575	-0.0082	1.575	-0.006	1.575	-0.0045		0.006	-0.846	1.575	-0.00534	1.575	-0.00553
1.574	-0.0082	1.574	-0.006	1.574	-0.0045		0.007	-0.839	1.574	-0.00526	1.574	-0.00544
1.573	-0.0083	1.573	-0.006	1.573	-0.0045		0.008	-0.832	1.573	-0.00528	1.573	-0.00544
1.572	-0.0084	1.572	-0.0061	1.572	-0.0046		0.009	-0.826	1.572	-0.00539	1.572	-0.00548
1.571	-0.0085	1.571	-0.0061	1.571	-0.0046		0.01	-0.819	1.571	-0.00537	1.571	-0.0055
1.57	-0.0086	1.57	-0.0061	1.57	-0.0047		0.011	-0.813	1.57	-0.00541	1.57	-0.00557
1.569	-0.0086	1.569	-0.0062	1.569	-0.0047		0.012	-0.806	1.569	-0.00538	1.569	-0.00563
1.568	-0.0087	1.568	-0.0062	1.568	-0.0046		0.013	-0.8	1.568	-0.00549	1.568	-0.0056
1.567	-0.0088	1.567	-0.0062	1.567	-0.0047		0.014	-0.794	1.567	-0.00549	1.567	-0.00567
1.566	-0.0089	1.566	-0.0062	1.566	-0.0047		0.015	-0.787	1.566	-0.00548	1.566	-0.0056
1.565	-0.009	1.565	-0.0062	1.565	-0.0048		0.016	-0.781	1.565	-0.00558	1.565	-0.00571
1.564	-0.009	1.564	-0.0062	1.564	-0.0049		0.017	-0.775	1.564	-0.00556	1.564	-0.00568
1.563	-0.0091	1.563	-0.0062	1.563	-0.0048		0.018	-0.768	1.563	-0.00558	1.563	-0.00574
1.562	-0.0092	1.562	-0.0063	1.562	-0.0049		0.019	-0.762	1.562	-0.00561	1.562	-0.00572
1.561	-0.0093	1.561	-0.0063	1.561	-0.0049		0.02	-0.756	1.561	-0.00566	1.561	-0.00579
1.56	-0.0094	1.56	-0.0063	1.56	-0.0049		0.021	-0.75	1.56	-0.00566	1.56	-0.00574
1.559	-0.0094	1.559	-0.0064	1.559	-0.005		0.022	-0.744	1.559	-0.00571	1.559	-0.00579
1.558	-0.0095	1.558	-0.0064	1.558	-0.0049		0.023	-0.738	1.558	-0.00579	1.558	-0.00585
1.557	-0.0096	1.557	-0.0064	1.557	-0.005		0.024	-0.732	1.557	-0.00567	1.557	-0.00582
1.556	-0.0097	1.556	-0.0065	1.556	-0.005		0.025	-0.726	1.556	-0.00577	1.556	-0.00585
1.555	-0.0098	1.555	-0.0064	1.555	-0.0051		0.026	-0.72	1.555	-0.00583	1.555	-0.00591
1.554	-0.0098	1.554	-0.0065	1.554	-0.0051		0.027	-0.715	1.554	-0.00582	1.554	-0.00592
1.553	-0.0099	1.553	-0.0065	1.553	-0.0051		0.028	-0.709	1.553	-0.00585	1.553	-0.00593
1.552	-0.01	1.552	-0.0065	1.552	-0.0051		0.029	-0.703	1.552	-0.00586	1.552	-0.00599
1.551	-0.0102	1.551	-0.0066	1.551	-0.0051		0.03	-0.697	1.551	-0.00599	1.551	-0.00595
1.55	-0.0102	1.55	-0.0066	1.55	-0.0052		0.031	-0.691	1.55	-0.00593	1.55	-0.00606
1.549	-0.0103	1.549	-0.0066	1.549	-0.0052		0.032	-0.685	1.549	-0.00594	1.549	-0.00602
1.548	-0.0104	1.548	-0.0067	1.548	-0.0053		0.033	-0.68	1.548	-0.00602	1.548	-0.00608
1.547	-0.0105	1.547	-0.0067	1.547	-0.0052		0.034	-0.674	1.547	-0.00603	1.547	-0.00606
1.546	-0.0106	1.546	-0.0066	1.546	-0.0053		0.035	-0.668	1.546	-0.00605	1.546	-0.0061
1.545	-0.0106	1.545	-0.0067	1.545	-0.0053		0.036	-0.663	1.545	-0.00608	1.545	-0.00616
1.544	-0.0107	1.544	-0.0067	1.544	-0.0054		0.037	-0.657	1.544	-0.00605	1.544	-0.00619
1.543	-0.0109	1.543	-0.0068	1.543	-0.0054		0.038	-0.651	1.543	-0.00617	1.543	-0.00625
1.542	-0.011	1.542	-0.0068	1.542	-0.0054		0.039	-0.646	1.542	-0.00615	1.542	-0.00621
1.541	-0.011	1.541	-0.0068	1.541	-0.0055		0.04	-0.64	1.541	-0.00615	1.541	-0.00625
1.54	-0.0111	1.54	-0.0068	1.54	-0.0055		0.041	-0.635	1.54	-0.00621	1.54	-0.00624
1.539	-0.0113	1.539	-0.0069	1.539	-0.0054		0.042	-0.629	1.539	-0.00619	1.539	-0.00625
1.538	-0.0114	1.538	-0.0069	1.538	-0.0055		0.043	-0.624	1.538	-0.00628	1.538	-0.00632
1.537	-0.0114	1.537	-0.0069	1.537	-0.0055		0.044	-0.618	1.537	-0.00628	1.537	-0.0063
1.536	-0.0116	1.536	-0.007	1.536	-0.0055		0.045	-0.613	1.536	-0.00631	1.536	-0.00635
1.535	-0.0117	1.535	-0.0069	1.535	-0.0056		0.046	-0.607	1.535	-0.00634	1.535	-0.00643
1.534	-0.0118	1.534	-0.007	1.534	-0.0056		0.047	-0.602	1.534	-0.00636	1.534	-0.00635
1.533	-0.0119	1.533	-0.0069	1.533	-0.0057		0.048	-0.596	1.533	-0.00639	1.533	-0.00641
1.532	-0.012	1.532	-0.007	1.532	-0.0057		0.049	-0.591	1.532	-0.00647	1.532	-0.00644
1.531	-0.0121	1.531	-0.007	1.531	-0.0057		0.05	-0.586	1.531	-0.00641	1.531	-0.00648
1.53	-0.0122	1.53	-0.0071	1.53	-0.0058		0.051	-0.58	1.53	-0.00651	1.53	-0.00653
1.529	-0.0123	1.529	-0.0071	1.529	-0.0057		0.052	-0.575	1.529	-0.00649	1.529	-0.00651
1.528	-0.0124	1.528	-0.0071	1.528	-0.0058		0.053	-0.57	1.528	-0.00654	1.528	-0.0065
1.527	-0.0126	1.527	-0.0072	1.527	-0.0058		0.054	-0.565	1.527	-0.00655	1.527	-0.00658
1.526	-0.0126	1.526	-0.0072	1.526	-0.0059		0.055	-0.559	1.526	-0.00659	1.526	-0.00661
1.525	-0.0127	1.525	-0.0072	1.525	-0.0058		0.056	-0.554	1.525	-0.00667	1.525	-0.0066
1.524	-0.0129	1.524	-0.0072	1.524	-0.0059		0.057	-0.548	1.524	-0.00664	1.524	-0.00668
1.523	-0.013	1.523	-0.0072	1.523	-0.006		0.058	-0.543	1.523	-0.00669	1.523	-0.00668
1.522	-0.0131	1.522	-0.0073	1.522	-0.0058		0.059	-0.538	1.522	-0.00668	1.522	-0.00666
1.521	-0.0132	1.521	-0.0073	1.521	-0.006		0.06	-0.533	1.521	-0.00671	1.521	-0.0067
1.52	-0.0133	1.52	-0.0072	1.52	-0.006		0.061	-0.528	1.52	-0.00676	1.52	-0.00674
1.519	-0.0135	1.519	-0.0074	1.519	-0.0061		0.062	-0.523	1.519	-0.00678	1.519	-0.00682
1.518	-0.0135	1.518	-0.0074	1.518	-0.006		0.063	-0.518	1.518	-0.00682	1.518	-0.00681
1.517	-0.0137	1.517	-0.0074	1.517	-0.0061		0.064	-0.512	1.517	-0.00683	1.517	-0.00683
1.516	-0.0138	1.516	-0.0074	1.516	-0.0061		0.065	-0.507	1.516	-0.00692	1.516	-0.00685
1.515	-0.0139	1.515	-0.0074	1.515	-0.0061		0.066	-0.502	1.515	-0.00691	1.515	-0.00686
1.514	-0.0141	1.514	-0.0075	1.514	-0.0062		0.067	-0.497	1.514	-0.00694	1.514	-0.00687
1.513	-0.0142	1.513	-0.0074	1.513	-0.0062		0.068	-0.492	1.513	-0.00697	1.513	-0.00692
1.512	-0.0143	1.512	-0.0075	1.512	-0.0061		0.069	-0.487	1.512	-0.00701	1.512	-0.00699
1.511	-0.0144	1.511	-0.0076	1.511	-0.0063		0.07	-0.482	1.511	-0.00703	1.511	-0.00696
1.51	-0.0146	1.51	-0.0075	1.51	-0.0062		0.071	-0.477	1.51	-0.00712	1.51	-0.00697
1.509	-0.0146	1.509	-0.0076	1.509	-0.0063		0.072	-0.472	1.509	-0.00706	1.509	-0.00704
1.508	-0.0148	1.508	-0.0077	1.508	-0.0063		0.073	-0.467	1.508	-0.00716	1.508	-0.007
1.507	-0.0149	1.507	-0.0076	1.507	-0.0064		0.074	-0.462	1.507	-0.00709	1.507	-0.00705
1.506	-0.015	1.506	-0.0076	1.506	-0.0063		0.075	-0.457	1.506	-0.00713	1.506	-0.00707
1.505	-0.0152	1.505	-0.0077	1.505	-0.0064		0.076	-0.452	1.505	-0.00718	1.505	-0.00717
1.504	-0.0153	1.504	-0.0077	1.504	-0.0064		0.077	-0.448	1.504	-0.00725	1.504	-0.0071
1.503	-0.0154	1.503	-0.0077	1.503	-0.0064		0.078	-0.443	1.503	-0.00727	1.503	-0.00722
1.502	-0.0155	1.502	-0.0077	1.502	-0.0064		0.079	-0.438	1.502	-0.00729	1.502	-0.00718
1.501	-0.0157	1.501	-0.0078	1.501	-0.0065		0.08	-0.433	1.501	-0.0073	1.501	-0.00722
1.5	-0.0158	1.5	-0.0078	1.5	-0.0065		0.081	-0.428	1.5	-0.00733	1.5	-0.00729
1.499	-0.0159	1.499	-0.0079	1.499	-0.0065		0.082	-0.424	1.499	-0.00738	1.499	-0.0073
1.498	-0.016	1.498	-0.0078	1.498	-0.0065		0.083	-0.419	1.498	-0.00741	1.498	-0.00731
1.497	-0.0162	1.497	-0.0079	1.497	-0.0066		0.084	-0.414	1.497	-0.00742	1.497	-0.00739
1.496	-0.0163	1.496	-0.0079	1.496	-0.0066		0.085	-0.409	1.496	-0.00745	1.496	-0.00736
1.495	-0.0165	1.495	-0.0079	1.495	-0.0067		0.086	-0.405	1.495	-0.00744	1.495	-0.00738
1.494	-0.0166	1.494	-0.008	1.494	-0.0067		0.087	-0.4	1.494	-0.00757	1.494	-0.00739
1.493	-0.0167	1.493	-0.008	1.493	-0.0066		0.088	-0.395	1.493	-0.00756	1.493	-0.00747
1.492	-0.0169	1.492	-0.008	1.492	-0.0067		0.089	-0.39	1.492	-0.00764	1.492	-0.00743
1.491	-0.017	1.491	-0.008	1.491	-0.0068		0.09	-0.386	1.491	-0.0076	1.491	-0.0075
1.49	-0.0171	1.49	-0.0081	1.49	-0.0068		0.091	-0.381	1.49	-0.00767	1.49	-0.00758
1.489	-0.0173	1.489	-0.0081	1.489	-0.0068		0.092	-0.377	1.489	-0.00771	1.489	-0.00754
1.488	-0.0174	1.488	-0.0082	1.488	-0.0068		0.093	-0.372	1.488	-0.0077	1.488	-0.00758
1.487	-0.0175	1.487	-0.0082	1.487	-0.0069		0.094	-0.368	1.487	-0.00775	1.487	-0.00764
1.486	-0.0177	1.486	-0.0082	1.486	-0.0069		0.095	-0.363	1.486	-0.00778	1.486	-0.00764
1.485	-0.0178	1.485	-0.0082	1.485	-0.007		0.096	-0.359	1.485	-0.00785	1.485	-0.0077
1.484	-0.0179	1.484	-0.0082	1.484	-0.0069		0.097	-0.354	1.484	-0.00786	1.484	-0.00764
1.483	-0.0181	1.483	-0.0082	1.483	-0.007		0.098	-0.349	1.483	-0.00783	1.483	-0.00773
1.482	-0.0182	1.482	-0.0082	1.482	-0.007		0.099	-0.345	1.482	-0.00792	1.482	-0.00776
1.481	-0.0183	1.481	-0.0083	1.481	-0.007		0.1	-0.341	1.481	-0.00795	1.481	-0.00781
1.48	-0.0185	1.48	-0.0083	1.48	-0.007		0.101	-0.336	1.48	-0.00801	1.48	-0.00779
1.479	-0.0186	1.479	-0.0084	1.479	-0.0071		0.102	-0.332	1.479	-0.00801	1.479	-0.00787
1.478	-0.0188	1.478	-0.0084	1.478	-0.0071		0.103	-0.327	1.478	-0.00805	1.478	-0.0079
1.477	-0.019	1.477	-0.0084	1.477	-0.0071		0.104	-0.323	1.477	-0.00808	1.477	-0.0079
1.476	-0.0191	1.476	-0.0085	1.476	-0.0072		0.105	-0.319	1.476	-0.00813	1.476	-0.00795
1.475	-0.0192	1.475	-0.0085	1.475	-0.0072		0.106	-0.315	1.475	-0.00815	1.475	-0.00797
1.474	-0.0194	1.474	-0.0086	1.474	-0.0072		0.107	-0.31	1.474	-0.00813	1.474	-0.00798
1.473	-0.0195	1.473	-0.0086	1.473	-0.0073		0.108	-0.306	1.473	-0.00824	1.473	-0.00808
1.472	-0.0196	1.472	-0.0086	1.472	-0.0073		0.109	-0.302	1.472	-0.00825	1.472	-0.00807
1.471	-0.0198	1.471	-0.0086	1.471	-0.0073		0.11	-0.297	1.471	-0.00828	1.471	-0.00807
1.47	-0.0199	1.47	-0.0086	1.47	-0.0074		0.111	-0.293	1.47	-0.00838	1.47	-0.00815
1.469	-0.0201	1.469	-0.0086	1.469	-0.0074		0.112	-0.289	1.469	-0.00837	1.469	-0.0082
1.468	-0.0202	1.468	-0.0087	1.468	-0.0074		0.113	-0.285	1.468	-0.00842	1.468	-0.00819
1.467	-0.0204	1.467	-0.0087	1.467	-0.0075		0.114	-0.281	1.467	-0.00851	1.467	-0.00828
1.466	-0.0206	1.466	-0.0088	1.466	-0.0075		0.115	-0.277	1.466	-0.00852	1.466	-0.00827
1.465	-0.0207	1.465	-0.0087	1.465	-0.0075		0.116	-0.272	1.465	-0.00852	1.465	-0.00836
1.464	-0.0207	1.464	-0.0088	1.464	-0.0075		0.117	-0.268	1.464	-0.00858	1.464	-0.00835
1.463	-0.0209	1.463	-0.0089	1.463	-0.0076		0.118	-0.264	1.463	-0.0086	1.463	-0.00839
1.462	-0.021	1.462	-0.0089	1.462	-0.0076		0.119	-0.26	1.462	-0.00862	1.462	-0.00842
1.461	-0.0212	1.461	-0.0089	1.461	-0.0076		0.12	-0.256	1.461	-0.00868	1.461	-0.00845
1.46	-0.0213	1.46	-0.009	1.46	-0.0077		0.121	-0.252	1.46	-0.00875	1.46	-0.00863
1.459	-0.0215	1.459	-0.009	1.459	-0.0077		0.122	-0.248	1.459	-0.00886	1.459	-0.00849
1.458	-0.0217	1.458	-0.009	1.458	-0.0077		0.123	-0.244	1.458	-0.00878	1.458	-0.0086
1.457	-0.0218	1.457	-0.009	1.457	-0.0077		0.124	-0.24	1.457	-0.00884	1.457	-0.00861
1.456	-0.0219	1.456	-0.009	1.456	-0.0077		0.125	-0.237	1.456	-0.00885	1.456	-0.00861
1.455	-0.0222	1.455	-0.0091	1.455	-0.0078		0.126	-0.233	1.455	-0.00896	1.455	-0.00868
1.454	-0.0222	1.454	-0.0092	1.454	-0.0078		0.127	-0.229	1.454	-0.00898	1.454	-0.00873
1.453	-0.0224	1.453	-0.0092	1.453	-0.0079		0.128	-0.225	1.453	-0.00903	1.453	-0.00872
1.452	-0.0226	1.452	-0.0092	1.452	-0.0079		0.129	-0.221	1.452	-0.00905	1.452	-0.00881
1.451	-0.0227	1.451	-0.0093	1.451	-0.008		0.13	-0.217	1.451	-0.0091	1.451	-0.0089
1.45	-0.0229	1.45	-0.0093	1.45	-0.008		0.131	-0.214	1.45	-0.00919	1.45	-0.00884
1.449	-0.0231	1.449	-0.0094	1.449	-0.0081		0.132	-0.21	1.449	-0.00927	1.449	-0.00889
1.448	-0.0232	1.448	-0.0094	1.448	-0.008		0.133	-0.206	1.448	-0.00919	1.448	-0.00897
1.447	-0.0234	1.447	-0.0094	1.447	-0.0082		0.134	-0.202	1.447	-0.00935	1.447	-0.00896
1.446	-0.0235	1.446	-0.0094	1.446	-0.0082		0.135	-0.198	1.446	-0.00934	1.446	-0.00912
1.445	-0.0237	1.445	-0.0094	1.445	-0.0082		0.136	-0.195	1.445	-0.0094	1.445	-0.00904
1.444	-0.0239	1.444	-0.0095	1.444	-0.0082		0.137	-0.191	1.444	-0.00948	1.444	-0.00912
1.443	-0.024	1.443	-0.0095	1.443	-0.0082		0.138	-0.187	1.443	-0.00948	1.443	-0.00915
1.442	-0.0242	1.442	-0.0095	1.442	-0.0083		0.139	-0.184	1.442	-0.00951	1.442	-0.00921
1.441	-0.0244	1.441	-0.0096	1.441	-0.0083		0.14	-0.18	1.441	-0.00963	1.441	-0.00927
1.44	-0.0245	1.44	-0.0096	1.44	-0.0083		0.141	-0.176	1.44	-0.00967	1.44	-0.00933
1.439	-0.0247	1.439	-0.0097	1.439	-0.0085		0.142	-0.173	1.439	-0.00972	1.439	-0.00939
1.438	-0.0248	1.438	-0.0097	1.438	-0.0084		0.143	-0.169	1.438	-0.00973	1.438	-0.00936
1.437	-0.025	1.437	-0.0098	1.437	-0.0085		0.144	-0.166	1.437	-0.00982	1.437	-0.00948
1.436	-0.0252	1.436	-0.0098	1.436	-0.0086		0.145	-0.162	1.436	-0.00989	1.436	-0.00954
1.435	-0.0254	1.435	-0.0098	1.435	-0.0086		0.146	-0.159	1.435	-0.00986	1.435	-0.00961
1.434	-0.0255	1.434	-0.0099	1.434	-0.0086		0.147	-0.155	1.434	-0.00996	1.434	-0.00964
1.433	-0.0257	1.433	-0.01	1.433	-0.0087		0.148	-0.152	1.433	-0.0101	1.433	-0.00966
1.432	-0.0258	1.432	-0.01	1.432	-0.0087		0.149	-0.148	1.432	-0.01	1.432	-0.00973
1.431	-0.026	1.431	-0.0101	1.431	-0.0088		0.15	-0.145	1.431	-0.0102	1.431	-0.00979
1.43	-0.0262	1.43	-0.0101	1.43	-0.0088		0.151	-0.141	1.43	-0.0102	1.43	-0.00986
1.429	-0.0263	1.429	-0.0101	1.429	-0.0088		0.152	-0.138	1.429	-0.0102	1.429	-0.00985
1.428	-0.0265	1.428	-0.0102	1.428	-0.0089		0.153	-0.134	1.428	-0.0103	1.428	-0.00993
1.427	-0.0266	1.427	-0.0102	1.427	-0.009		0.154	-0.131	1.427	-0.0104	1.427	-0.00999
1.426	-0.0268	1.426	-0.0102	1.426	-0.009		0.155	-0.129	1.426	-0.0104	1.426	-0.01
1.425	-0.027	1.425	-0.0103	1.425	-0.009		0.156	-0.126	1.425	-0.0105	1.425	-0.0101
1.424	-0.0272	1.424	-0.0103	1.424	-0.009		0.157	-0.122	1.424	-0.0106	1.424	-0.0102
1.423	-0.0274	1.423	-0.0104	1.423	-0.0091		0.158	-0.119	1.423	-0.0107	1.423	-0.0102
1.422	-0.0274	1.422	-0.0105	1.422	-0.0091		0.159	-0.116	1.422	-0.0107	1.422	-0.0103
1.421	-0.0277	1.421	-0.0106	1.421	-0.0093		0.16	-0.112	1.421	-0.0108	1.421	-0.0104
1.42	-0.0278	1.42	-0.0106	1.42	-0.0093		0.161	-0.109	1.42	-0.0109	1.42	-0.0104
1.419	-0.028	1.419	-0.0106	1.419	-0.0094		0.162	-0.106	1.419	-0.0109	1.419	-0.0105
1.418	-0.0282	1.418	-0.0107	1.418	-0.0094		0.163	-0.103	1.418	-0.011	1.418	-0.0105
1.417	-0.0283	1.417	-0.0107	1.417	-0.0094		0.164	-0.0993	1.417	-0.0111	1.417	-0.0107
1.416	-0.0285	1.416	-0.0108	1.416	-0.0095		0.165	-0.0961	1.416	-0.0111	1.416	-0.0106
1.415	-0.0287	1.415	-0.0108	1.415	-0.0096		0.166	-0.0928	1.415	-0.0112	1.415	-0.0108
1.414	-0.0288	1.414	-0.0109	1.414	-0.0097		0.167	-0.0896	1.414	-0.0113	1.414	-0.0108
1.413	-0.029	1.413	-0.011	1.413	-0.0097		0.168	-0.0864	1.413	-0.0114	1.413	-0.0108
1.412	-0.0291	1.412	-0.011	1.412	-0.0098		0.169	-0.0833	1.412	-0.0115	1.412	-0.011
1.411	-0.0293	1.411	-0.0111	1.411	-0.0098		0.17	-0.0801	1.411	-0.0115	1.411	-0.011
1.41	-0.0295	1.41	-0.0111	1.41	-0.0098		0.171	-0.0769	1.41	-0.0116	1.41	-0.0111
1.409	-0.0297	1.409	-0.0112	1.409	-0.0099		0.172	-0.0738	1.409	-0.0117	1.409	-0.0112
1.408	-0.0298	1.408	-0.0113	1.408	-0.0101		0.173	-0.0707	1.408	-0.0117	1.408	-0.0112
1.407	-0.03	1.407	-0.0114	1.407	-0.01		0.174	-0.0675	1.407	-0.0118	1.407	-0.0113
1.406	-0.0302	1.406	-0.0114	1.406	-0.0102		0.175	-0.0644	1.406	-0.0119	1.406	-0.0114
1.405	-0.0303	1.405	-0.0115	1.405	-0.0102		0.176	-0.0614	1.405	-0.012	1.405	-0.0115
1.404	-0.0305	1.404	-0.0116	1.404	-0.0103		0.177	-0.0583	1.404	-0.0121	1.404	-0.0116
1.403	-0.0306	1.403	-0.0117	1.403	-0.0104		0.178	-0.0552	1.403	-0.0122	1.403	-0.0117
1.402	-0.0308	1.402	-0.0117	1.402	-0.0104		0.179	-0.0522	1.402	-0.0123	1.402	-0.0118
1.401	-0.031	1.401	-0.0118	1.401	-0.0105		0.18	-0.0491	1.401	-0.0124	1.401	-0.0118
1.4	-0.0311	1.4	-0.0118	1.4	-0.0106		0.181	-0.0461	1.4	-0.0125	1.4	-0.0119
1.399	-0.0314	1.399	-0.012	1.399	-0.0106		0.182	-0.0431	1.399	-0.0126	1.399	-0.012
1.398	-0.0315	1.398	-0.012	1.398	-0.0107		0.183	-0.0401	1.398	-0.0127	1.398	-0.0121
1.397	-0.0316	1.397	-0.0121	1.397	-0.0108		0.184	-0.0371	1.397	-0.0128	1.397	-0.0122
1.396	-0.0318	1.396	-0.0122	1.396	-0.0109		0.185	-0.0341	1.396	-0.0129	1.396	-0.0123
1.395	-0.032	1.395	-0.0122	1.395	-0.011		0.186	-0.0312	1.395	-0.013	1.395	-0.0124
1.394	-0.0322	1.394	-0.0123	1.394	-0.011		0.187	-0.0282	1.394	-0.013	1.394	-0.0124
1.393	-0.0323	1.393	-0.0124	1.393	-0.0111		0.188	-0.0252	1.393	-0.0132	1.393	-0.0126
1.392	-0.0325	1.392	-0.0125	1.392	-0.0113		0.189	-0.0223	1.392	-0.0133	1.392	-0.0126
1.391	-0.0327	1.391	-0.0126	1.391	-0.0113		0.19	-0.0194	1.391	-0.0134	1.391	-0.0128
1.39	-0.0329	1.39	-0.0126	1.39	-0.0114		0.191	-0.0165	1.39	-0.0136	1.39	-0.0128
1.389	-0.033	1.389	-0.0127	1.389	-0.0115		0.192	-0.0136	1.389	-0.0135	1.389	-0.0129
1.388	-0.0332	1.388	-0.0129	1.388	-0.0116		0.193	-0.0107	1.388	-0.0137	1.388	-0.0131
1.387	-0.0334	1.387	-0.013	1.387	-0.0118		0.194	-0.00803	1.387	-0.0139	1.387	-0.0132
1.386	-0.0335	1.386	-0.013	1.386	-0.0118		0.195	-0.00519	1.386	-0.0139	1.386	-0.0133
1.385	-0.0337	1.385	-0.0131	1.385	-0.0118		0.196	-0.00233	1.385	-0.0141	1.385	-0.0134
1.384	-0.0338	1.384	-0.0133	1.384	-0.012		0.197	0.000497	1.384	-0.0142	1.384	-0.0135
1.383	-0.0341	1.383	-0.0134	1.383	-0.0121		0.198	0.00331	1.383	-0.0144	1.383	-0.0137
1.382	-0.0342	1.382	-0.0134	1.382	-0.0122		0.199	0.00617	1.382	-0.0144	1.382	-0.0138
1.381	-0.0344	1.381	-0.0135	1.381	-0.0123		0.2	0.00895	1.381	-0.0146	1.381	-0.0138
1.38	-0.0346	1.38	-0.0137	1.38	-0.0124		0.201	0.0118	1.38	-0.0147	1.38	-0.014
1.379	-0.0347	1.379	-0.0138	1.379	-0.0126		0.202	0.0146	1.379	-0.0148	1.379	-0.0141
1.378	-0.035	1.378	-0.0138	1.378	-0.0126		0.203	0.0174	1.378	-0.0149	1.378	-0.0142
1.377	-0.0351	1.377	-0.014	1.377	-0.0127		0.204	0.0202	1.377	-0.0151	1.377	-0.0144
1.376	-0.0353	1.376	-0.0141	1.376	-0.0128		0.205	0.0231	1.376	-0.0151	1.376	-0.0144
1.375	-0.0354	1.375	-0.0142	1.375	-0.013		0.206	0.0259	1.375	-0.0154	1.375	-0.0146
1.374	-0.0356	1.374	-0.0144	1.374	-0.013		0.207	0.0288	1.374	-0.0155	1.374	-0.0147
1.373	-0.0358	1.373	-0.0145	1.373	-0.0132		0.208	0.0317	1.373	-0.0156	1.373	-0.0148
1.372	-0.036	1.372	-0.0146	1.372	-0.0134		0.209	0.0345	1.372	-0.0158	1.372	-0.015
1.371	-0.0362	1.371	-0.0147	1.371	-0.0134		0.21	0.0372	1.371	-0.0159	1.371	-0.0151
1.37	-0.0363	1.37	-0.0149	1.37	-0.0136		0.211	0.04	1.37	-0.0161	1.37	-0.0153
1.369	-0.0365	1.369	-0.015	1.369	-0.0138		0.212	0.0429	1.369	-0.0163	1.369	-0.0154
1.368	-0.0366	1.368	-0.0151	1.368	-0.0138		0.213	0.0457	1.368	-0.0163	1.368	-0.0156
1.367	-0.0368	1.367	-0.0152	1.367	-0.014		0.214	0.0484	1.367	-0.0165	1.367	-0.0158
1.366	-0.037	1.366	-0.0154	1.366	-0.0142		0.215	0.0513	1.366	-0.0167	1.366	-0.0158
1.365	-0.0371	1.365	-0.0155	1.365	-0.0142		0.216	0.054	1.365	-0.0168	1.365	-0.016
1.364	-0.0373	1.364	-0.0157	1.364	-0.0145		0.217	0.0569	1.364	-0.017	1.364	-0.0162
1.363	-0.0374	1.363	-0.0158	1.363	-0.0146		0.218	0.0597	1.363	-0.0172	1.363	-0.0162
1.362	-0.0376	1.362	-0.016	1.362	-0.0147		0.219	0.0625	1.362	-0.0173	1.362	-0.0166
1.361	-0.0378	1.361	-0.0161	1.361	-0.0149		0.22	0.0653	1.361	-0.0175	1.361	-0.0166
1.36	-0.0379	1.36	-0.0162	1.36	-0.015		0.221	0.0681	1.36	-0.0177	1.36	-0.0169
1.359	-0.0381	1.359	-0.0165	1.359	-0.0152		0.222	0.0709	1.359	-0.0178	1.359	-0.0169
1.358	-0.0382	1.358	-0.0166	1.358	-0.0154		0.223	0.0737	1.358	-0.018	1.358	-0.0172
1.357	-0.0383	1.357	-0.0166	1.357	-0.0155		0.224	0.0765	1.357	-0.0182	1.357	-0.0173
1.356	-0.0385	1.356	-0.0169	1.356	-0.0156		0.225	0.0794	1.356	-0.0183	1.356	-0.0175
1.355	-0.0386	1.355	-0.017	1.355	-0.0158		0.226	0.0822	1.355	-0.0185	1.355	-0.0176
1.354	-0.0388	1.354	-0.0172	1.354	-0.016		0.227	0.085	1.354	-0.0187	1.354	-0.0179
1.353	-0.039	1.353	-0.0174	1.353	-0.0162		0.228	0.0878	1.353	-0.0189	1.353	-0.018
1.352	-0.039	1.352	-0.0176	1.352	-0.0163		0.229	0.0906	1.352	-0.0191	1.352	-0.0182
1.351	-0.0392	1.351	-0.0177	1.351	-0.0166		0.23	0.0935	1.351	-0.0193	1.351	-0.0184
1.35	-0.0393	1.35	-0.0179	1.35	-0.0167		0.231	0.0963	1.35	-0.0195	1.35	-0.0186
1.349	-0.0394	1.349	-0.0181	1.349	-0.0169		0.232	0.0991	1.349	-0.0197	1.349	-0.0187
1.348	-0.0395	1.348	-0.0182	1.348	-0.0171		0.233	0.102	1.348	-0.0199	1.348	-0.019
1.347	-0.0397	1.347	-0.0185	1.347	-0.0173		0.234	0.105	1.347	-0.0201	1.347	-0.0191
1.346	-0.0398	1.346	-0.0186	1.346	-0.0175		0.235	0.108	1.346	-0.0203	1.346	-0.0193
1.345	-0.0399	1.345	-0.0188	1.345	-0.0177		0.236	0.11	1.345	-0.0205	1.345	-0.0195
1.344	-0.0401	1.344	-0.019	1.344	-0.0179		0.237	0.113	1.344	-0.0208	1.344	-0.0196
1.343	-0.0402	1.343	-0.0192	1.343	-0.0181		0.238	0.116	1.343	-0.0208	1.343	-0.02
1.342	-0.0403	1.342	-0.0194	1.342	-0.0183		0.239	0.119	1.342	-0.0211	1.342	-0.0202
1.341	-0.0404	1.341	-0.0196	1.341	-0.0186		0.24	0.122	1.341	-0.0213	1.341	-0.0204
1.34	-0.0406	1.34	-0.0198	1.34	-0.0186		0.241	0.125	1.34	-0.0216	1.34	-0.0205
1.339	-0.0406	1.339	-0.02	1.339	-0.019		0.242	0.127	1.339	-0.0217	1.339	-0.0207
1.338	-0.0408	1.338	-0.0202	1.338	-0.0191		0.243	0.13	1.338	-0.022	1.338	-0.021
1.337	-0.0409	1.337	-0.0205	1.337	-0.0194		0.244	0.133	1.337	-0.0223	1.337	-0.0212
1.336	-0.041	1.336	-0.0206	1.336	-0.0196		0.245	0.136	1.336	-0.0225	1.336	-0.0214
1.335	-0.0411	1.335	-0.0208	1.335	-0.0198		0.246	0.139	1.335	-0.0227	1.335	-0.0217
1.334	-0.0413	1.334	-0.021	1.334	-0.0201		0.247	0.142	1.334	-0.0229	1.334	-0.0219
1.333	-0.0414	1.333	-0.0213	1.333	-0.0203		0.248	0.145	1.333	-0.0232	1.333	-0.0221
1.332	-0.0415	1.332	-0.0214	1.332	-0.0206		0.249	0.147	1.332	-0.0235	1.332	-0.0224
1.331	-0.0417	1.331	-0.0217	1.331	-0.0207		0.25	0.15	1.331	-0.0237	1.331	-0.0227
1.33	-0.0418	1.33	-0.0219	1.33	-0.0209		0.251	0.153	1.33	-0.0238	1.33	-0.0228
1.329	-0.0419	1.329	-0.0222	1.329	-0.0212		0.252	0.156	1.329	-0.0242	1.329	-0.0231
1.328	-0.0421	1.328	-0.0224	1.328	-0.0214		0.253	0.159	1.328	-0.0244	1.328	-0.0233
1.327	-0.0422	1.327	-0.0227	1.327	-0.0217		0.254	0.162	1.327	-0.0247	1.327	-0.0236
1.326	-0.0423	1.326	-0.0229	1.326	-0.0219		0.255	0.165	1.326	-0.0249	1.326	-0.0239
1.325	-0.0425	1.325	-0.0232	1.325	-0.0222		0.256	0.167	1.325	-0.0252	1.325	-0.024
1.324	-0.0426	1.324	-0.0234	1.324	-0.0225		0.257	0.17	1.324	-0.0255	1.324	-0.0243
1.323	-0.0428	1.323	-0.0237	1.323	-0.0227		0.258	0.173	1.323	-0.0257	1.323	-0.0245
1.322	-0.043	1.322	-0.0239	1.322	-0.023		0.259	0.176	1.322	-0.0259	1.322	-0.0249
1.321	-0.043	1.321	-0.0242	1.321	-0.0233		0.26	0.179	1.321	-0.0262	1.321	-0.0252
1.32	-0.0432	1.32	-0.0244	1.32	-0.0235		0.261	0.182	1.32	-0.0265	1.32	-0.0254
1.319	-0.0434	1.319	-0.0247	1.319	-0.0239		0.262	0.185	1.319	-0.0266	1.319	-0.0257
1.318	-0.0435	1.318	-0.025	1.318	-0.0242		0.263	0.188	1.318	-0.0269	1.318	-0.0259
1.317	-0.0437	1.317	-0.0253	1.317	-0.0244		0.264	0.191	1.317	-0.0272	1.317	-0.0262
1.316	-0.0438	1.316	-0.0256	1.316	-0.0247		0.265	0.194	1.316	-0.0275	1.316	-0.0265
1.315	-0.044	1.315	-0.0258	1.315	-0.025		0.266	0.196	1.315	-0.0277	1.315	-0.0266
1.314	-0.0442	1.314	-0.0262	1.314	-0.0253		0.267	0.199	1.314	-0.028	1.314	-0.0269
1.313	-0.0443	1.313	-0.0264	1.313	-0.0256		0.268	0.202	1.313	-0.0284	1.313	-0.0272
1.312	-0.0445	1.312	-0.0267	1.312	-0.0259		0.269	0.205	1.312	-0.0285	1.312	-0.0274
1.311	-0.0446	1.311	-0.027	1.311	-0.0262		0.27	0.208	1.311	-0.0289	1.311	-0.0277
1.31	-0.0448	1.31	-0.0273	1.31	-0.0266		0.271	0.211	1.31	-0.0292	1.31	-0.028
1.309	-0.045	1.309	-0.0276	1.309	-0.0269		0.272	0.214	1.309	-0.0295	1.309	-0.0284
1.308	-0.0451	1.308	-0.0279	1.308	-0.0272		0.273	0.217	1.308	-0.0298	1.308	-0.0287
1.307	-0.0453	1.307	-0.0282	1.307	-0.0275		0.274	0.22	1.307	-0.0301	1.307	-0.029
1.306	-0.0454	1.306	-0.0286	1.306	-0.0278		0.275	0.223	1.306	-0.0305	1.306	-0.0292
1.305	-0.0456	1.305	-0.0288	1.305	-0.0282		0.276	0.226	1.305	-0.0308	1.305	-0.0296
1.304	-0.0458	1.304	-0.0291	1.304	-0.0285		0.277	0.229	1.304	-0.031	1.304	-0.0299
1.303	-0.046	1.303	-0.0294	1.303	-0.0289		0.278	0.232	1.303	-0.0314	1.303	-0.0301
1.302	-0.0462	1.302	-0.0298	1.302	-0.0291		0.279	0.235	1.302	-0.0316	1.302	-0.0305
1.301	-0.0463	1.301	-0.0302	1.301	-0.0294		0.28	0.238	1.301	-0.032	1.301	-0.0308
1.3	-0.0466	1.3	-0.0304	1.3	-0.0298		0.281	0.241	1.3	-0.0323	1.3	-0.0311
1.299	-0.0467	1.299	-0.0307	1.299	-0.0302		0.282	0.244	1.299	-0.0327	1.299	-0.0314
1.298	-0.0469	1.298	-0.0311	1.298	-0.0305		0.283	0.247	1.298	-0.033	1.298	-0.0318
1.297	-0.047	1.297	-0.0314	1.297	-0.0309		0.284	0.25	1.297	-0.0332	1.297	-0.032
1.296	-0.0473	1.296	-0.0317	1.296	-0.0312		0.285	0.253	1.296	-0.0336	1.296	-0.0324
1.295	-0.0474	1.295	-0.0321	1.295	-0.0316		0.286	0.256	1.295	-0.034	1.295	-0.0328
1.294	-0.0476	1.294	-0.0323	1.294	-0.0319		0.287	0.26	1.294	-0.0343	1.294	-0.033
1.293	-0.0478	1.293	-0.0327	1.293	-0.0322		0.288	0.263	1.293	-0.0346	1.293	-0.0334
1.292	-0.048	1.292	-0.0331	1.292	-0.0326		0.289	0.266	1.292	-0.035	1.292	-0.0337
1.291	-0.0482	1.291	-0.0334	1.291	-0.033		0.29	0.271	1.291	-0.0353	1.291	-0.034
1.29	-0.0484	1.29	-0.0338	1.29	-0.0333		0.291	0.274	1.29	-0.0357	1.29	-0.0344
1.289	-0.0486	1.289	-0.0342	1.289	-0.0338		0.292	0.277	1.289	-0.036	1.289	-0.0347
1.288	-0.0488	1.288	-0.0345	1.288	-0.0342		0.293	0.28	1.288	-0.0363	1.288	-0.035
1.287	-0.049	1.287	-0.0349	1.287	-0.0345		0.294	0.283	1.287	-0.0367	1.287	-0.0355
1.286	-0.0492	1.286	-0.0351	1.286	-0.0349		0.295	0.287	1.286	-0.037	1.286	-0.0358
1.285	-0.0494	1.285	-0.0355	1.285	-0.0352		0.296	0.29	1.285	-0.0374	1.285	-0.0361
1.284	-0.0496	1.284	-0.0359	1.284	-0.0356		0.297	0.293	1.284	-0.0377	1.284	-0.0365
1.283	-0.0498	1.283	-0.0362	1.283	-0.0359		0.298	0.296	1.283	-0.0381	1.283	-0.0369
1.282	-0.05	1.282	-0.0366	1.282	-0.0364		0.299	0.3	1.282	-0.0384	1.282	-0.0372
1.281	-0.0502	1.281	-0.037	1.281	-0.0367		0.3	0.303	1.281	-0.0387	1.281	-0.0375
1.28	-0.0505	1.28	-0.0374	1.28	-0.0371		0.301	0.306	1.28	-0.0392	1.28	-0.0379
1.279	-0.0506	1.279	-0.0378	1.279	-0.0376		0.302	0.309	1.279	-0.0395	1.279	-0.0383
1.278	-0.0509	1.278	-0.0382	1.278	-0.0379		0.303	0.313	1.278	-0.0398	1.278	-0.0386
1.277	-0.051	1.277	-0.0385	1.277	-0.0384		0.304	0.316	1.277	-0.0402	1.277	-0.039
1.276	-0.0513	1.276	-0.0389	1.276	-0.0387		0.305	0.319	1.276	-0.0406	1.276	-0.0394
1.275	-0.0515	1.275	-0.0392	1.275	-0.0391		0.306	0.323	1.275	-0.0409	1.275	-0.0397
1.274	-0.0518	1.274	-0.0396	1.274	-0.0395		0.307	0.326	1.274	-0.0413	1.274	-0.0401
1.273	-0.0519	1.273	-0.04	1.273	-0.0398		0.308	0.33	1.273	-0.0417	1.273	-0.0404
1.272	-0.0522	1.272	-0.0404	1.272	-0.0402		0.309	0.333	1.272	-0.042	1.272	-0.0408
1.271	-0.0524	1.271	-0.0408	1.271	-0.0407		0.31	0.337	1.271	-0.0425	1.271	-0.0413
1.27	-0.0526	1.27	-0.0411	1.27	-0.0411		0.311	0.34	1.27	-0.0427	1.27	-0.0415
1.269	-0.0528	1.269	-0.0414	1.269	-0.0415		0.312	0.344	1.269	-0.0432	1.269	-0.042
1.268	-0.053	1.268	-0.0419	1.268	-0.0419		0.313	0.348	1.268	-0.0435	1.268	-0.0423
1.267	-0.0533	1.267	-0.0422	1.267	-0.0422		0.314	0.351	1.267	-0.0439	1.267	-0.0427
1.266	-0.0535	1.266	-0.0426	1.266	-0.0426		0.315	0.355	1.266	-0.0442	1.266	-0.0431
1.265	-0.0538	1.265	-0.043	1.265	-0.0432		0.316	0.358	1.265	-0.0446	1.265	-0.0435
1.264	-0.054	1.264	-0.0434	1.264	-0.0434		0.317	0.362	1.264	-0.045	1.264	-0.0438
1.263	-0.0542	1.263	-0.0438	1.263	-0.0439		0.318	0.365	1.263	-0.0454	1.263	-0.0443
1.262	-0.0545	1.262	-0.0442	1.262	-0.0443		0.319	0.369	1.262	-0.0457	1.262	-0.0446
1.261	-0.0547	1.261	-0.0446	1.261	-0.0447		0.32	0.373	1.261	-0.0462	1.261	-0.0449
1.26	-0.055	1.26	-0.045	1.26	-0.0452		0.321	0.377	1.26	-0.0466	1.26	-0.0454
1.259	-0.0552	1.259	-0.0454	1.259	-0.0455		0.322	0.38	1.259	-0.0468	1.259	-0.0457
1.258	-0.0554	1.258	-0.0458	1.258	-0.0459		0.323	0.384	1.258	-0.0473	1.258	-0.0462
1.257	-0.0557	1.257	-0.0462	1.257	-0.0465		0.324	0.388	1.257	-0.0477	1.257	-0.0464
1.256	-0.0559	1.256	-0.0466	1.256	-0.0468		0.325	0.392	1.256	-0.048	1.256	-0.0468
1.255	-0.0562	1.255	-0.047	1.255	-0.0472		0.326	0.396	1.255	-0.0484	1.255	-0.0473
1.254	-0.0565	1.254	-0.0474	1.254	-0.0476		0.327	0.4	1.254	-0.0488	1.254	-0.0477
1.253	-0.0566	1.253	-0.0478	1.253	-0.0481		0.328	0.403	1.253	-0.0492	1.253	-0.048
1.252	-0.057	1.252	-0.0482	1.252	-0.0485		0.329	0.408	1.252	-0.0496	1.252	-0.0485
1.251	-0.0572	1.251	-0.0486	1.251	-0.0489		0.33	0.412	1.251	-0.0499	1.251	-0.0488
1.25	-0.0574	1.25	-0.049	1.25	-0.0493		0.331	0.415	1.25	-0.0504	1.25	-0.0492
1.249	-0.0578	1.249	-0.0494	1.249	-0.0498		0.332	0.42	1.249	-0.0507	1.249	-0.0496
1.248	-0.058	1.248	-0.0498	1.248	-0.0501		0.333	0.424	1.248	-0.0511	1.248	-0.05
1.247	-0.0582	1.247	-0.0502	1.247	-0.0506		0.334	0.428	1.247	-0.0515	1.247	-0.0505
1.246	-0.0585	1.246	-0.0506	1.246	-0.051		0.335	0.432	1.246	-0.0518	1.246	-0.0508
1.245	-0.0588	1.245	-0.051	1.245	-0.0514		0.336	0.436	1.245	-0.0523	1.245	-0.0512
1.244	-0.059	1.244	-0.0514	1.244	-0.0518		0.337	0.44	1.244	-0.0527	1.244	-0.0516
1.243	-0.0593	1.243	-0.0518	1.243	-0.0522		0.338	0.445	1.243	-0.053	1.243	-0.052
1.242	-0.0596	1.242	-0.0522	1.242	-0.0526		0.339	0.449	1.242	-0.0534	1.242	-0.0523
1.241	-0.0598	1.241	-0.0526	1.241	-0.053		0.34	0.453	1.241	-0.0538	1.241	-0.0528
1.24	-0.0602	1.24	-0.053	1.24	-0.0534		0.341	0.458	1.24	-0.0541	1.24	-0.0531
1.239	-0.0604	1.239	-0.0534	1.239	-0.0538		0.342	0.462	1.239	-0.0545	1.239	-0.0536
1.238	-0.0607	1.238	-0.0538	1.238	-0.0542		0.343	0.466	1.238	-0.055	1.238	-0.0539
1.237	-0.061	1.237	-0.0542	1.237	-0.0546		0.344	0.471	1.237	-0.0553	1.237	-0.0543
1.236	-0.0613	1.236	-0.0546	1.236	-0.0551		0.345	0.475	1.236	-0.0557	1.236	-0.0547
1.235	-0.0615	1.235	-0.055	1.235	-0.0554		0.346	0.48	1.235	-0.0562	1.235	-0.0552
1.234	-0.0618	1.234	-0.0554	1.234	-0.0558		0.347	0.485	1.234	-0.0565	1.234	-0.0555
1.233	-0.0621	1.233	-0.0558	1.233	-0.0563		0.348	0.489	1.233	-0.0569	1.233	-0.0559
1.232	-0.0624	1.232	-0.0562	1.232	-0.0566		0.349	0.494	1.232	-0.0573	1.232	-0.0563
1.231	-0.0627	1.231	-0.0566	1.231	-0.0571		0.35	0.498	1.231	-0.0577	1.231	-0.0567
1.23	-0.063	1.23	-0.057	1.23	-0.0576		0.351	0.503	1.23	-0.058	1.23	-0.057
1.229	-0.0633	1.229	-0.0574	1.229	-0.058		0.352	0.508	1.229	-0.0585	1.229	-0.0575
1.228	-0.0636	1.228	-0.0578	1.228	-0.0584		0.353	0.513	1.228	-0.0589	1.228	-0.0579
1.227	-0.0639	1.227	-0.0582	1.227	-0.0588		0.354	0.518	1.227	-0.0592	1.227	-0.0582
1.226	-0.0642	1.226	-0.0586	1.226	-0.0592		0.355	0.523	1.226	-0.0596	1.226	-0.0587
1.225	-0.0645	1.225	-0.059	1.225	-0.0596		0.356	0.528	1.225	-0.06	1.225	-0.0591
1.224	-0.0648	1.224	-0.0594	1.224	-0.06		0.357	0.533	1.224	-0.0604	1.224	-0.0594
1.223	-0.0651	1.223	-0.0598	1.223	-0.0605		0.358	0.538	1.223	-0.0607	1.223	-0.0599
1.222	-0.0654	1.222	-0.0602	1.222	-0.0608		0.359	0.543	1.222	-0.0612	1.222	-0.0602
1.221	-0.0658	1.221	-0.0606	1.221	-0.0612		0.36	0.548	1.221	-0.0615	1.221	-0.0606
1.22	-0.0661	1.22	-0.061	1.22	-0.0616		0.361	0.553	1.22	-0.062	1.22	-0.061
1.219	-0.0663	1.219	-0.0614	1.219	-0.062		0.362	0.559	1.219	-0.0623	1.219	-0.0613
1.218	-0.0666	1.218	-0.0618	1.218	-0.0624		0.363	0.564	1.218	-0.0627	1.218	-0.0618
1.217	-0.067	1.217	-0.0622	1.217	-0.0627		0.364	0.569	1.217	-0.0631	1.217	-0.0622
1.216	-0.0673	1.216	-0.0626	1.216	-0.0632		0.365	0.574	1.216	-0.0634	1.216	-0.0625
1.215	-0.0676	1.215	-0.063	1.215	-0.0636		0.366	0.58	1.215	-0.0638	1.215	-0.0629
1.214	-0.0679	1.214	-0.0634	1.214	-0.0639		0.367	0.585	1.214	-0.0642	1.214	-0.0634
1.213	-0.0683	1.213	-0.0637	1.213	-0.0644		0.368	0.591	1.213	-0.0645	1.213	-0.0637
1.212	-0.0686	1.212	-0.0642	1.212	-0.0648		0.369	0.596	1.212	-0.0649	1.212	-0.064
1.211	-0.0689	1.211	-0.0645	1.211	-0.0652		0.37	0.602	1.211	-0.0653	1.211	-0.0644
1.21	-0.0692	1.21	-0.065	1.21	-0.0655		0.371	0.607	1.21	-0.0657	1.21	-0.0648
1.209	-0.0696	1.209	-0.0653	1.209	-0.0659		0.372	0.613	1.209	-0.066	1.209	-0.0653
1.208	-0.0699	1.208	-0.0657	1.208	-0.0663		0.373	0.618	1.208	-0.0664	1.208	-0.0655
1.207	-0.0702	1.207	-0.0661	1.207	-0.0667		0.374	0.624	1.207	-0.0667	1.207	-0.0659
1.206	-0.0706	1.206	-0.0664	1.206	-0.067		0.375	0.63	1.206	-0.0671	1.206	-0.0664
1.205	-0.071	1.205	-0.0669	1.205	-0.0674		0.376	0.636	1.205	-0.0675	1.205	-0.0666
1.204	-0.0713	1.204	-0.0672	1.204	-0.0678		0.377	0.642	1.204	-0.0679	1.204	-0.0671
1.203	-0.0716	1.203	-0.0676	1.203	-0.0682		0.378	0.648	1.203	-0.0682	1.203	-0.0674
1.202	-0.072	1.202	-0.068	1.202	-0.0686		0.379	0.654	1.202	-0.0686	1.202	-0.0678
1.201	-0.0723	1.201	-0.0685	1.201	-0.069		0.38	0.66	1.201	-0.0689	1.201	-0.0682
1.2	-0.0726	1.2	-0.0686	1.2	-0.0694		0.381	0.666	1.2	-0.0693	1.2	-0.0685
1.199	-0.073	1.199	-0.0691	1.199	-0.0697		0.382	0.672	1.199	-0.0697	1.199	-0.0689
1.198	-0.0734	1.198	-0.0694	1.198	-0.0702		0.383	0.678	1.198	-0.0701	1.198	-0.0693
1.197	-0.0737	1.197	-0.0699	1.197	-0.0705		0.384	0.684	1.197	-0.0704	1.197	-0.0696
1.196	-0.074	1.196	-0.0702	1.196	-0.071		0.385	0.691	1.196	-0.0708	1.196	-0.0701
1.195	-0.0744	1.195	-0.0706	1.195	-0.0713		0.386	0.697	1.195	-0.0712	1.195	-0.0704
1.194	-0.0748	1.194	-0.071	1.194	-0.0717		0.387	0.703	1.194	-0.0715	1.194	-0.0708
1.193	-0.0751	1.193	-0.0714	1.193	-0.072		0.388	0.71	1.193	-0.0719	1.193	-0.0711
1.192	-0.0755	1.192	-0.0718	1.192	-0.0724		0.389	0.716	1.192	-0.0722	1.192	-0.0715
1.191	-0.0759	1.191	-0.0721	1.191	-0.0727		0.39	0.723	1.191	-0.0726	1.191	-0.0718
1.19	-0.0762	1.19	-0.0726	1.19	-0.0731		0.391	0.729	1.19	-0.0729	1.19	-0.0722
1.189	-0.0766	1.189	-0.0729	1.189	-0.0734		0.392	0.736	1.189	-0.0733	1.189	-0.0725
1.188	-0.077	1.188	-0.0733	1.188	-0.0739		0.393	0.742	1.188	-0.0737	1.188	-0.073
1.187	-0.0774	1.187	-0.0735	1.187	-0.0743		0.394	0.749	1.187	-0.0741	1.187	-0.0732
1.186	-0.0778	1.186	-0.074	1.186	-0.0746		0.395	0.755	1.186	-0.0744	1.186	-0.0737
1.185	-0.0781	1.185	-0.0743	1.185	-0.075		0.396	0.762	1.185	-0.0748	1.185	-0.0741
1.184	-0.0785	1.184	-0.0746	1.184	-0.0754		0.397	0.769	1.184	-0.0751	1.184	-0.0743
1.183	-0.0788	1.183	-0.075	1.183	-0.0757		0.398	0.776	1.183	-0.0754	1.183	-0.0748
1.182	-0.0793	1.182	-0.0754	1.182	-0.0761		0.399	0.783	1.182	-0.0757	1.182	-0.075
1.181	-0.0796	1.181	-0.0758	1.181	-0.0763		0.4	0.79	1.181	-0.0762	1.181	-0.0754
1.18	-0.08	1.18	-0.0762	1.18	-0.0768		0.401	0.797	1.18	-0.0765	1.18	-0.0758
1.179	-0.08	1.179	-0.0765	1.179	-0.077		0.402	0.804	1.179	-0.0768	1.179	-0.0761
1.178	-0.0808	1.178	-0.0769	1.178	-0.0774		0.403	0.811	1.178	-0.0773	1.178	-0.0764
1.177	-0.0808	1.177	-0.0773	1.177	-0.0778		0.404	0.818	1.177	-0.0776	1.177	-0.0769
1.176	-0.0816	1.176	-0.0776	1.176	-0.0782		0.405	0.825	1.176	-0.0779	1.176	-0.0772
1.175	-0.0816	1.175	-0.0779	1.175	-0.0786		0.406	0.832	1.175	-0.0782	1.175	-0.0776
1.174	-0.0824	1.174	-0.0783	1.174	-0.0789		0.407	0.839	1.174	-0.0786	1.174	-0.0779
1.173	-0.0824	1.173	-0.0786	1.173	-0.0793		0.408	0.846	1.173	-0.0789	1.173	-0.0783
1.172	-0.0832	1.172	-0.079	1.172	-0.0795		0.409	0.853	1.172	-0.0793	1.172	-0.0786
1.171	-0.0832	1.171	-0.0794	1.171	-0.0798		0.41	0.86	1.171	-0.0796	1.171	-0.0789
1.17	-0.084	1.17	-0.0798	1.17	-0.08		0.411	0.867	1.17	-0.0799	1.17	-0.0792
1.169	-0.084	1.169	-0.08	1.169	-0.0808		0.412	0.875	1.169	-0.0803	1.169	-0.0796
1.168	-0.0848	1.168	-0.0808	1.168	-0.0808		0.413	0.882	1.168	-0.0806	1.168	-0.0799
1.167	-0.0848	1.167	-0.0808	1.167	-0.0816		0.414	0.888	1.167	-0.081	1.167	-0.0802
1.166	-0.0856	1.166	-0.0808	1.166	-0.0816		0.415	0.896	1.166	-0.0812	1.166	-0.0806
1.165	-0.0856	1.165	-0.0816	1.165	-0.0816		0.416	0.903	1.165	-0.0816	1.165	-0.0809
1.164	-0.0864	1.164	-0.0816	1.164	-0.0824		0.417	0.91	1.164	-0.082	1.164	-0.0813
1.163	-0.0864	1.163	-0.0824	1.163	-0.0824		0.418	0.917	1.163	-0.0823	1.163	-0.0816
1.162	-0.0872	1.162	-0.0824	1.162	-0.0832		0.419	0.924	1.162	-0.0826	1.162	-0.0818
1.161	-0.088	1.161	-0.0832	1.161	-0.0832		0.42	0.931	1.161	-0.0829	1.161	-0.0823
1.16	-0.088	1.16	-0.0832	1.16	-0.084		0.421	0.938	1.16	-0.0832	1.16	-0.0825
1.159	-0.0888	1.159	-0.0832	1.159	-0.084		0.422	0.944	1.159	-0.0836	1.159	-0.0829
1.158	-0.0888	1.158	-0.084	1.158	-0.084		0.423	0.951	1.158	-0.0839	1.158	-0.0833
1.157	-0.0896	1.157	-0.084	1.157	-0.0848		0.424	0.958	1.157	-0.0842	1.157	-0.0836
1.156	-0.0896	1.156	-0.0848	1.156	-0.0848		0.425	0.965	1.156	-0.0846	1.156	-0.084
1.155	-0.0904	1.155	-0.0848	1.155	-0.0856		0.426	0.971	1.155	-0.0849	1.155	-0.0843
1.154	-0.0904	1.154	-0.0856	1.154	-0.0856		0.427	0.978	1.154	-0.0852	1.154	-0.0846
1.153	-0.0912	1.153	-0.0856	1.153	-0.0856		0.428	0.984	1.153	-0.0856	1.153	-0.0849
1.152	-0.0912	1.152	-0.0856	1.152	-0.0864		0.429	0.99	1.152	-0.0859	1.152	-0.0852
1.151	-0.092	1.151	-0.0864	1.151	-0.0864		0.43	0.996	1.151	-0.0862	1.151	-0.0855
1.15	-0.092	1.15	-0.0864	1.15	-0.0872		0.431	1	1.15	-0.0865	1.15	-0.0859
1.149	-0.0928	1.149	-0.0864	1.149	-0.0872		0.432	1.01	1.149	-0.0868	1.149	-0.0862
1.148	-0.0928	1.148	-0.0872	1.148	-0.0872		0.433	1.01	1.148	-0.0871	1.148	-0.0864
1.147	-0.0936	1.147	-0.0872	1.147	-0.088		0.434	1.02	1.147	-0.0875	1.147	-0.0868
1.146	-0.0944	1.146	-0.088	1.146	-0.088		0.435	1.03	1.146	-0.0879	1.146	-0.0871
1.145	-0.0944	1.145	-0.088	1.145	-0.0888		0.436	1.03	1.145	-0.088	1.145	-0.0875
1.144	-0.0952	1.144	-0.0888	1.144	-0.0888		0.437	1.04	1.144	-0.0884	1.144	-0.0878
1.143	-0.0952	1.143	-0.0888	1.143	-0.0888		0.438	1.04	1.143	-0.0888	1.143	-0.0881
1.142	-0.096	1.142	-0.0888	1.142	-0.0896		0.439	1.05	1.142	-0.089	1.142	-0.0884
1.141	-0.096	1.141	-0.0896	1.141	-0.0896		0.44	1.05	1.141	-0.0894	1.141	-0.0887
1.14	-0.0968	1.14	-0.0896	1.14	-0.0904		0.441	1.05	1.14	-0.0897	1.14	-0.089
1.139	-0.0968	1.139	-0.0904	1.139	-0.0904		0.442	1.06	1.139	-0.0899	1.139	-0.0893
1.138	-0.0976	1.138	-0.0904	1.138	-0.0904		0.443	1.06	1.138	-0.0903	1.138	-0.0897
1.137	-0.0984	1.137	-0.0904	1.137	-0.0912		0.444	1.07	1.137	-0.0906	1.137	-0.09
1.136	-0.0984	1.136	-0.0912	1.136	-0.0912		0.445	1.07	1.136	-0.0909	1.136	-0.0902
1.135	-0.0992	1.135	-0.0912	1.135	-0.092		0.446	1.07	1.135	-0.0913	1.135	-0.0905
1.134	-0.0992	1.134	-0.092	1.134	-0.092		0.447	1.08	1.134	-0.0916	1.134	-0.091
1.133	-0.1	1.133	-0.092	1.133	-0.092		0.448	1.08	1.133	-0.0919	1.133	-0.0912
1.132	-0.1	1.132	-0.092	1.132	-0.0928		0.449	1.08	1.132	-0.0923	1.132	-0.0916
1.131	-0.1008	1.131	-0.0928	1.131	-0.0928		0.45	1.08	1.131	-0.0925	1.131	-0.0918
1.13	-0.1016	1.13	-0.0928	1.13	-0.0928		0.451	1.08	1.13	-0.0927	1.13	-0.0921
1.129	-0.1016	1.129	-0.0936	1.129	-0.0936		0.452	1.09	1.129	-0.0931	1.129	-0.0925
1.128	-0.1024	1.128	-0.0936	1.128	-0.0936		0.453	1.09	1.128	-0.0935	1.128	-0.0928
1.127	-0.1024	1.127	-0.0936	1.127	-0.0944		0.454	1.09	1.127	-0.0937	1.127	-0.093
1.126	-0.1032	1.126	-0.0944	1.126	-0.0944		0.455	1.09	1.126	-0.094	1.126	-0.0933
1.125	-0.104	1.125	-0.0944	1.125	-0.0944		0.456	1.09	1.125	-0.0943	1.125	-0.0937
1.124	-0.104	1.124	-0.0952	1.124	-0.0952		0.457	1.09	1.124	-0.0946	1.124	-0.094
1.123	-0.1048	1.123	-0.0952	1.123	-0.0952		0.458	1.1	1.123	-0.0949	1.123	-0.0942
1.122	-0.1048	1.122	-0.0952	1.122	-0.096		0.459	1.1	1.122	-0.0953	1.122	-0.0945
1.121	-0.1056	1.121	-0.096	1.121	-0.096		0.46	1.1	1.121	-0.0957	1.121	-0.0948
1.12	-0.1064	1.12	-0.096	1.12	-0.096		0.461	1.1	1.12	-0.0958	1.12	-0.0951
1.119	-0.1064	1.119	-0.096	1.119	-0.0968		0.462	1.1	1.119	-0.0961	1.119	-0.0955
1.118	-0.1072	1.118	-0.0968	1.118	-0.0968		0.463	1.1	1.118	-0.0965	1.118	-0.0958
1.117	-0.1072	1.117	-0.0968	1.117	-0.0968		0.464	1.1	1.117	-0.0967	1.117	-0.096
1.116	-0.108	1.116	-0.0976	1.116	-0.0976		0.465	1.1	1.116	-0.0971	1.116	-0.0963
1.115	-0.1088	1.115	-0.0976	1.115	-0.0976		0.466	1.1	1.115	-0.0974	1.115	-0.0965
1.114	-0.1088	1.114	-0.0976	1.114	-0.0976		0.467	1.1	1.114	-0.0977	1.114	-0.0969
1.113	-0.1096	1.113	-0.0984	1.113	-0.0984		0.468	1.1	1.113	-0.098	1.113	-0.0972
1.112	-0.1104	1.112	-0.0984	1.112	-0.0984		0.469	1.1	1.112	-0.0981	1.112	-0.0975
1.111	-0.1104	1.111	-0.0984	1.111	-0.0992		0.47	1.1	1.111	-0.0985	1.111	-0.0979
1.11	-0.1112	1.11	-0.0992	1.11	-0.0992		0.471	1.1	1.11	-0.0988	1.11	-0.0981
1.109	-0.1112	1.109	-0.0992	1.109	-0.0992		0.472	1.1	1.109	-0.0991	1.109	-0.0983
1.108	-0.112	1.108	-0.1	1.108	-0.1		0.473	1.1	1.108	-0.0995	1.108	-0.0988
1.107	-0.1128	1.107	-0.1	1.107	-0.1		0.474	1.1	1.107	-0.0996	1.107	-0.099
1.106	-0.1128	1.106	-0.1	1.106	-0.1008		0.475	1.1	1.106	-0.1	1.106	-0.0994
1.105	-0.1136	1.105	-0.1008	1.105	-0.1008		0.476	1.1	1.105	-0.1	1.105	-0.0996
1.104	-0.1144	1.104	-0.1008	1.104	-0.1008		0.477	1.1	1.104	-0.1	1.104	-0.0998
1.103	-0.1144	1.103	-0.1016	1.103	-0.1016		0.478	1.1	1.103	-0.101	1.103	-0.1
1.102	-0.1152	1.102	-0.1016	1.102	-0.1016		0.479	1.09	1.102	-0.101	1.102	-0.1
1.101	-0.116	1.101	-0.1016	1.101	-0.1016		0.48	1.09	1.101	-0.101	1.101	-0.101
1.1	-0.116	1.1	-0.1024	1.1	-0.1024		0.481	1.09	1.1	-0.102	1.1	-0.101
1.099	-0.1168	1.099	-0.1024	1.099	-0.1024		0.482	1.09	1.099	-0.102	1.099	-0.101
1.098	-0.1176	1.098	-0.1024	1.098	-0.1032		0.483	1.09	1.098	-0.102	1.098	-0.102
1.097	-0.1176	1.097	-0.1032	1.097	-0.1032		0.484	1.08	1.097	-0.102	1.097	-0.102
1.096	-0.1184	1.096	-0.1032	1.096	-0.1032		0.485	1.08	1.096	-0.103	1.096	-0.102
1.095	-0.1192	1.095	-0.104	1.095	-0.104		0.486	1.08	1.095	-0.103	1.095	-0.103
1.094	-0.1192	1.094	-0.104	1.094	-0.104		0.487	1.08	1.094	-0.103	1.094	-0.103
1.093	-0.12	1.093	-0.104	1.093	-0.104		0.488	1.07	1.093	-0.104	1.093	-0.103
1.092	-0.1208	1.092	-0.1048	1.092	-0.1048		0.489	1.07	1.092	-0.104	1.092	-0.103
1.091	-0.1208	1.091	-0.1048	1.091	-0.1048		0.49	1.07	1.091	-0.104	1.091	-0.104
1.09	-0.1216	1.09	-0.1048	1.09	-0.1048		0.491	1.07	1.09	-0.105	1.09	-0.104
1.089	-0.1224	1.089	-0.1056	1.089	-0.1056		0.492	1.06	1.089	-0.105	1.089	-0.104
1.088	-0.1224	1.088	-0.1056	1.088	-0.1056		0.493	1.06	1.088	-0.105	1.088	-0.105
1.087	-0.1232	1.087	-0.1064	1.087	-0.1064		0.494	1.06	1.087	-0.106	1.087	-0.105
1.086	-0.124	1.086	-0.1064	1.086	-0.1064		0.495	1.05	1.086	-0.106	1.086	-0.105
1.085	-0.124	1.085	-0.1064	1.085	-0.1064		0.496	1.05	1.085	-0.106	1.085	-0.105
1.084	-0.1248	1.084	-0.1072	1.084	-0.1072		0.497	1.05	1.084	-0.106	1.084	-0.106
1.083	-0.1256	1.083	-0.1072	1.083	-0.1072		0.498	1.05	1.083	-0.107	1.083	-0.106
1.082	-0.1264	1.082	-0.1072	1.082	-0.1072		0.499	1.04	1.082	-0.107	1.082	-0.106
1.081	-0.1264	1.081	-0.108	1.081	-0.108		0.5	1.04	1.081	-0.107	1.081	-0.107
1.08	-0.1272	1.08	-0.108	1.08	-0.108		0.501	1.04	1.08	-0.108	1.08	-0.107
1.079	-0.128	1.079	-0.1088	1.079	-0.108		0.502	1.03	1.079	-0.108	1.079	-0.107
1.078	-0.128	1.078	-0.1088	1.078	-0.1088		0.503	1.03	1.078	-0.108	1.078	-0.107
1.077	-0.1288	1.077	-0.1088	1.077	-0.1088		0.504	1.03	1.077	-0.109	1.077	-0.108
1.076	-0.1296	1.076	-0.1096	1.076	-0.1096		0.505	1.02	1.076	-0.109	1.076	-0.108
1.075	-0.1304	1.075	-0.1096	1.075	-0.1096		0.506	1.02	1.075	-0.109	1.075	-0.108
1.074	-0.1304	1.074	-0.1096	1.074	-0.1096		0.507	1.02	1.074	-0.11	1.074	-0.109
1.073	-0.1312	1.073	-0.1104	1.073	-0.1104		0.508	1.01	1.073	-0.11	1.073	-0.109
1.072	-0.132	1.072	-0.1104	1.072	-0.1104		0.509	1.01	1.072	-0.11	1.072	-0.109
1.071	-0.132	1.071	-0.1112	1.071	-0.1104		0.51	1.01	1.071	-0.11	1.071	-0.109
1.07	-0.1328	1.07	-0.1112	1.07	-0.1112		0.511	1	1.07	-0.111	1.07	-0.11
1.069	-0.1336	1.069	-0.1112	1.069	-0.1112		0.512	1	1.069	-0.111	1.069	-0.11
1.068	-0.1344	1.068	-0.112	1.068	-0.112		0.513	0.996	1.068	-0.111	1.068	-0.11
1.067	-0.1344	1.067	-0.112	1.067	-0.112		0.514	0.993	1.067	-0.112	1.067	-0.111
1.066	-0.1352	1.066	-0.112	1.066	-0.112		0.515	0.989	1.066	-0.112	1.066	-0.111
1.065	-0.136	1.065	-0.1128	1.065	-0.1128		0.516	0.986	1.065	-0.112	1.065	-0.111
1.064	-0.1368	1.064	-0.1128	1.064	-0.1128		0.517	0.981	1.064	-0.112	1.064	-0.112
1.063	-0.1368	1.063	-0.1128	1.063	-0.1136		0.518	0.978	1.063	-0.113	1.063	-0.112
1.062	-0.1376	1.062	-0.1136	1.062	-0.1136		0.519	0.974	1.062	-0.113	1.062	-0.112
1.061	-0.1384	1.061	-0.1136	1.061	-0.1136		0.52	0.971	1.061	-0.113	1.061	-0.112
1.06	-0.1384	1.06	-0.1144	1.06	-0.1144		0.521	0.967	1.06	-0.114	1.06	-0.113
1.059	-0.1392	1.059	-0.1144	1.059	-0.1144		0.522	0.963	1.059	-0.114	1.059	-0.113
1.058	-0.14	1.058	-0.1144	1.058	-0.1144		0.523	0.959	1.058	-0.114	1.058	-0.113
1.057	-0.1408	1.057	-0.1152	1.057	-0.1152		0.524	0.955	1.057	-0.115	1.057	-0.114
1.056	-0.1408	1.056	-0.1152	1.056	-0.1152		0.525	0.951	1.056	-0.115	1.056	-0.114
1.055	-0.1416	1.055	-0.116	1.055	-0.1152		0.526	0.947	1.055	-0.115	1.055	-0.114
1.054	-0.1424	1.054	-0.116	1.054	-0.116		0.527	0.943	1.054	-0.115	1.054	-0.114
1.053	-0.1432	1.053	-0.116	1.053	-0.116		0.528	0.939	1.053	-0.116	1.053	-0.115
1.052	-0.1432	1.052	-0.1168	1.052	-0.1168		0.529	0.935	1.052	-0.116	1.052	-0.115
1.051	-0.144	1.051	-0.1168	1.051	-0.1168		0.53	0.931	1.051	-0.116	1.051	-0.115
1.05	-0.1448	1.05	-0.1168	1.05	-0.1168		0.531	0.927	1.05	-0.117	1.05	-0.115
1.049	-0.1448	1.049	-0.1176	1.049	-0.1176		0.532	0.923	1.049	-0.117	1.049	-0.116
1.048	-0.1456	1.048	-0.1176	1.048	-0.1176		0.533	0.919	1.048	-0.117	1.048	-0.116
1.047	-0.1464	1.047	-0.1184	1.047	-0.1176		0.534	0.915	1.047	-0.117	1.047	-0.116
1.046	-0.1464	1.046	-0.1184	1.046	-0.1184		0.535	0.911	1.046	-0.118	1.046	-0.117
1.045	-0.1472	1.045	-0.1184	1.045	-0.1184		0.536	0.906	1.045	-0.118	1.045	-0.117
1.044	-0.148	1.044	-0.1192	1.044	-0.1184		0.537	0.902	1.044	-0.119	1.044	-0.117
1.043	-0.1488	1.043	-0.1192	1.043	-0.1192		0.538	0.898	1.043	-0.119	1.043	-0.118
1.042	-0.1488	1.042	-0.1192	1.042	-0.1192		0.539	0.894	1.042	-0.119	1.042	-0.118
1.041	-0.1496	1.041	-0.12	1.041	-0.12		0.54	0.889	1.041	-0.119	1.041	-0.118
1.04	-0.1496	1.04	-0.12	1.04	-0.12		0.541	0.885	1.04	-0.12	1.04	-0.118
1.039	-0.1504	1.039	-0.1208	1.039	-0.1208		0.542	0.881	1.039	-0.12	1.039	-0.119
1.038	-0.1512	1.038	-0.1208	1.038	-0.1208		0.543	0.876	1.038	-0.12	1.038	-0.119
1.037	-0.1512	1.037	-0.1208	1.037	-0.1208		0.544	0.872	1.037	-0.121	1.037	-0.119
1.036	-0.152	1.036	-0.1216	1.036	-0.1216		0.545	0.868	1.036	-0.121	1.036	-0.12
1.035	-0.1528	1.035	-0.1216	1.035	-0.1216		0.546	0.863	1.035	-0.121	1.035	-0.12
1.034	-0.1528	1.034	-0.1216	1.034	-0.1216		0.547	0.859	1.034	-0.122	1.034	-0.12
1.033	-0.1536	1.033	-0.1224	1.033	-0.1224		0.548	0.855	1.033	-0.122	1.033	-0.121
1.032	-0.1544	1.032	-0.1224	1.032	-0.1224		0.549	0.85	1.032	-0.122	1.032	-0.121
1.031	-0.1544	1.031	-0.1232	1.031	-0.1232		0.55	0.846	1.031	-0.122	1.031	-0.121
1.03	-0.1552	1.03	-0.1232	1.03	-0.1232		0.551	0.842	1.03	-0.123	1.03	-0.122
1.029	-0.156	1.029	-0.1232	1.029	-0.1232		0.552	0.837	1.029	-0.123	1.029	-0.122
1.028	-0.156	1.028	-0.124	1.028	-0.124		0.553	0.833	1.028	-0.123	1.028	-0.122
1.027	-0.1568	1.027	-0.124	1.027	-0.124		0.554	0.828	1.027	-0.124	1.027	-0.122
1.026	-0.1576	1.026	-0.124	1.026	-0.124		0.555	0.824	1.026	-0.124	1.026	-0.123
1.025	-0.1576	1.025	-0.1248	1.025	-0.1248		0.556	0.82	1.025	-0.124	1.025	-0.123
1.024	-0.1584	1.024	-0.1256	1.024	-0.1248		0.557	0.815	1.024	-0.125	1.024	-0.123
1.023	-0.1592	1.023	-0.1256	1.023	-0.1256		0.558	0.811	1.023	-0.125	1.023	-0.124
1.022	-0.1592	1.022	-0.1256	1.022	-0.1256		0.559	0.806	1.022	-0.125	1.022	-0.124
1.021	-0.16	1.021	-0.1256	1.021	-0.1256		0.56	0.802	1.021	-0.125	1.021	-0.124
1.02	-0.1608	1.02	-0.1264	1.02	-0.1264		0.561	0.797	1.02	-0.126	1.02	-0.125
1.019	-0.1608	1.019	-0.1264	1.019	-0.1264		0.562	0.793	1.019	-0.126	1.019	-0.125
1.018	-0.1616	1.018	-0.1272	1.018	-0.1272		0.563	0.789	1.018	-0.126	1.018	-0.125
1.017	-0.1624	1.017	-0.1272	1.017	-0.1272		0.564	0.784	1.017	-0.127	1.017	-0.125
1.016	-0.1632	1.016	-0.128	1.016	-0.1272		0.565	0.78	1.016	-0.127	1.016	-0.126
1.015	-0.1632	1.015	-0.128	1.015	-0.128		0.566	0.775	1.015	-0.128	1.015	-0.126
1.014	-0.164	1.014	-0.128	1.014	-0.128		0.567	0.771	1.014	-0.128	1.014	-0.126
1.013	-0.1648	1.013	-0.1288	1.013	-0.128		0.568	0.767	1.013	-0.128	1.013	-0.127
1.012	-0.1648	1.012	-0.1288	1.012	-0.1288		0.569	0.762	1.012	-0.128	1.012	-0.127
1.011	-0.1656	1.011	-0.1288	1.011	-0.1288		0.57	0.758	1.011	-0.129	1.011	-0.127
1.01	-0.1664	1.01	-0.1296	1.01	-0.1296		0.571	0.753	1.01	-0.129	1.01	-0.128
1.009	-0.1664	1.009	-0.1296	1.009	-0.1296		0.572	0.749	1.009	-0.129	1.009	-0.128
1.008	-0.1672	1.008	-0.1304	1.008	-0.1296		0.573	0.745	1.008	-0.13	1.008	-0.128
1.007	-0.168	1.007	-0.1304	1.007	-0.1304		0.574	0.74	1.007	-0.13	1.007	-0.129
1.006	-0.1688	1.006	-0.1304	1.006	-0.1304		0.575	0.736	1.006	-0.13	1.006	-0.129
1.005	-0.1688	1.005	-0.1312	1.005	-0.1312		0.576	0.732	1.005	-0.131	1.005	-0.129
1.004	-0.1696	1.004	-0.1312	1.004	-0.1312		0.577	0.728	1.004	-0.131	1.004	-0.129
1.003	-0.1704	1.003	-0.132	1.003	-0.1312		0.578	0.723	1.003	-0.131	1.003	-0.13
1.002	-0.1704	1.002	-0.132	1.002	-0.132		0.579	0.719	1.002	-0.132	1.002	-0.13
1.001	-0.1712	1.001	-0.132	1.001	-0.132		0.58	0.715	1.001	-0.132	1.001	-0.13
1	-0.172	1	-0.1328	1	-0.1328		0.581	0.71	1	-0.132	1	-0.131
0.999	-0.1728	0.999	-0.1328	0.999	-0.1328		0.582	0.706	0.999	-0.132	0.999	-0.131
0.998	-0.1728	0.998	-0.1336	0.998	-0.1328		0.583	0.702	0.998	-0.133	0.998	-0.131
0.997	-0.1736	0.997	-0.1336	0.997	-0.1336		0.584	0.698	0.997	-0.133	0.997	-0.132
0.996	-0.1744	0.996	-0.1336	0.996	-0.1336		0.585	0.694	0.996	-0.133	0.996	-0.132
0.995	-0.1744	0.995	-0.1344	0.995	-0.1336		0.586	0.689	0.995	-0.134	0.995	-0.132
0.994	-0.1752	0.994	-0.1344	0.994	-0.1344		0.587	0.685	0.994	-0.134	0.994	-0.133
0.993	-0.176	0.993	-0.1344	0.993	-0.1344		0.588	0.681	0.993	-0.134	0.993	-0.133
0.992	-0.1768	0.992	-0.1352	0.992	-0.1352		0.589	0.677	0.992	-0.135	0.992	-0.133
0.991	-0.1768	0.991	-0.1352	0.991	-0.1352		0.59	0.673	0.991	-0.135	0.991	-0.134
0.99	-0.1776	0.99	-0.136	0.99	-0.136		0.591	0.669	0.99	-0.135	0.99	-0.134
0.989	-0.1784	0.989	-0.136	0.989	-0.136		0.592	0.665	0.989	-0.136	0.989	-0.134
0.988	-0.1784	0.988	-0.136	0.988	-0.136		0.593	0.66	0.988	-0.136	0.988	-0.134
0.987	-0.1792	0.987	-0.1368	0.987	-0.1368		0.594	0.656	0.987	-0.136	0.987	-0.135
0.986	-0.18	0.986	-0.1368	0.986	-0.1368		0.595	0.653	0.986	-0.137	0.986	-0.135
0.985	-0.1808	0.985	-0.1376	0.985	-0.1376		0.596	0.648	0.985	-0.137	0.985	-0.135
0.984	-0.1816	0.984	-0.1376	0.984	-0.1376		0.597	0.644	0.984	-0.137	0.984	-0.136
0.983	-0.1816	0.983	-0.1384	0.983	-0.1376		0.598	0.641	0.983	-0.138	0.983	-0.136
0.982	-0.1824	0.982	-0.1384	0.982	-0.1384		0.599	0.637	0.982	-0.138	0.982	-0.136
0.981	-0.1832	0.981	-0.1384	0.981	-0.1384		0.6	0.632	0.981	-0.138	0.981	-0.137
0.98	-0.184	0.98	-0.1392	0.98	-0.1384		0.601	0.629	0.98	-0.139	0.98	-0.137
0.979	-0.184	0.979	-0.1392	0.979	-0.1392		0.602	0.625	0.979	-0.139	0.979	-0.137
0.978	-0.1848	0.978	-0.1392	0.978	-0.1392		0.603	0.621	0.978	-0.139	0.978	-0.138
0.977	-0.1856	0.977	-0.14	0.977	-0.1392		0.604	0.617	0.977	-0.14	0.977	-0.138
0.976	-0.1856	0.976	-0.14	0.976	-0.14		0.605	0.613	0.976	-0.14	0.976	-0.138
0.975	-0.1864	0.975	-0.1408	0.975	-0.14		0.606	0.609	0.975	-0.14	0.975	-0.139
0.974	-0.1872	0.974	-0.1408	0.974	-0.1408		0.607	0.606	0.974	-0.14	0.974	-0.139
0.973	-0.188	0.973	-0.1408	0.973	-0.1408		0.608	0.602	0.973	-0.141	0.973	-0.139
0.972	-0.188	0.972	-0.1416	0.972	-0.1416		0.609	0.598	0.972	-0.141	0.972	-0.139
0.971	-0.1888	0.971	-0.1416	0.971	-0.1416		0.61	0.594	0.971	-0.141	0.971	-0.14
0.97	-0.1896	0.97	-0.1424	0.97	-0.1416		0.611	0.591	0.97	-0.142	0.97	-0.14
0.969	-0.1904	0.969	-0.1424	0.969	-0.1424		0.612	0.587	0.969	-0.142	0.969	-0.14
0.968	-0.1904	0.968	-0.1424	0.968	-0.1424		0.613	0.583	0.968	-0.142	0.968	-0.141
0.967	-0.1912	0.967	-0.1432	0.967	-0.1424		0.614	0.58	0.967	-0.143	0.967	-0.141
0.966	-0.192	0.966	-0.1432	0.966	-0.1432		0.615	0.576	0.966	-0.143	0.966	-0.141
0.965	-0.1928	0.965	-0.1432	0.965	-0.1432		0.616	0.573	0.965	-0.143	0.965	-0.141
0.964	-0.1928	0.964	-0.144	0.964	-0.1432		0.617	0.569	0.964	-0.144	0.964	-0.142
0.963	-0.1936	0.963	-0.144	0.963	-0.144		0.618	0.566	0.963	-0.144	0.963	-0.142
0.962	-0.1944	0.962	-0.1448	0.962	-0.144		0.619	0.562	0.962	-0.144	0.962	-0.142
0.961	-0.1952	0.961	-0.1448	0.961	-0.144		0.62	0.559	0.961	-0.144	0.961	-0.143
0.96	-0.196	0.96	-0.1448	0.96	-0.1448		0.621	0.555	0.96	-0.145	0.96	-0.143
0.959	-0.196	0.959	-0.1456	0.959	-0.1448		0.622	0.552	0.959	-0.145	0.959	-0.143
0.958	-0.1968	0.958	-0.1456	0.958	-0.1448		0.623	0.548	0.958	-0.145	0.958	-0.143
0.957	-0.1976	0.957	-0.1456	0.957	-0.1456		0.624	0.545	0.957	-0.145	0.957	-0.144
0.956	-0.1984	0.956	-0.1464	0.956	-0.1456		0.625	0.541	0.956	-0.146	0.956	-0.144
0.955	-0.1984	0.955	-0.1464	0.955	-0.1456		0.626	0.538	0.955	-0.146	0.955	-0.144
0.954	-0.1992	0.954	-0.1464	0.954	-0.1464		0.627	0.535	0.954	-0.146	0.954	-0.145
0.953	-0.2	0.953	-0.1472	0.953	-0.1464		0.628	0.531	0.953	-0.147	0.953	-0.145
0.952	-0.2008	0.952	-0.1472	0.952	-0.1472		0.629	0.528	0.952	-0.147	0.952	-0.145
0.951	-0.2008	0.951	-0.1472	0.951	-0.1472		0.63	0.525	0.951	-0.147	0.951	-0.145
0.95	-0.2016	0.95	-0.148	0.95	-0.1472		0.631	0.522	0.95	-0.147	0.95	-0.146
0.949	-0.2024	0.949	-0.148	0.949	-0.148		0.632	0.518	0.949	-0.148	0.949	-0.146
0.948	-0.2032	0.948	-0.148	0.948	-0.148		0.633	0.515	0.948	-0.148	0.948	-0.146
0.947	-0.2032	0.947	-0.1488	0.947	-0.148		0.634	0.512	0.947	-0.148	0.947	-0.146
0.946	-0.204	0.946	-0.1488	0.946	-0.1488		0.635	0.509	0.946	-0.149	0.946	-0.147
0.945	-0.2048	0.945	-0.1488	0.945	-0.1488		0.636	0.506	0.945	-0.149	0.945	-0.147
0.944	-0.2056	0.944	-0.1496	0.944	-0.1488		0.637	0.503	0.944	-0.149	0.944	-0.147
0.943	-0.2064	0.943	-0.1496	0.943	-0.1496		0.638	0.5	0.943	-0.149	0.943	-0.147
0.942	-0.2064	0.942	-0.1496	0.942	-0.1496		0.639	0.497	0.942	-0.149	0.942	-0.148
0.941	-0.2072	0.941	-0.1504	0.941	-0.1496		0.64	0.493	0.941	-0.15	0.941	-0.148
0.94	-0.2064	0.94	-0.1504	0.94	-0.1496		0.641	0.491	0.94	-0.15	0.94	-0.148
0.939	-0.2072	0.939	-0.1504	0.939	-0.1504		0.642	0.488	0.939	-0.15	0.939	-0.148
0.938	-0.208	0.938	-0.1512	0.938	-0.1504		0.643	0.484	0.938	-0.151	0.938	-0.149
0.937	-0.2088	0.937	-0.1512	0.937	-0.1504		0.644	0.482	0.937	-0.151	0.937	-0.149
0.936	-0.2088	0.936	-0.1512	0.936	-0.1512		0.645	0.479	0.936	-0.151	0.936	-0.149
0.935	-0.2096	0.935	-0.152	0.935	-0.1512		0.646	0.476	0.935	-0.151	0.935	-0.15
0.934	-0.2104	0.934	-0.152	0.934	-0.1512		0.647	0.473	0.934	-0.152	0.934	-0.15
0.933	-0.2112	0.933	-0.152	0.933	-0.1512		0.648	0.47	0.933	-0.152	0.933	-0.15
0.932	-0.212	0.932	-0.1528	0.932	-0.152		0.649	0.468	0.932	-0.152	0.932	-0.15
0.931	-0.2128	0.931	-0.1528	0.931	-0.152		0.65	0.465	0.931	-0.152	0.931	-0.15
0.93	-0.2128	0.93	-0.1528	0.93	-0.152		0.651	0.462	0.93	-0.153	0.93	-0.151
0.929	-0.2136	0.929	-0.1528	0.929	-0.1528		0.652	0.459	0.929	-0.153	0.929	-0.151
0.928	-0.2144	0.928	-0.1536	0.928	-0.1528		0.653	0.456	0.928	-0.153	0.928	-0.151
0.927	-0.2152	0.927	-0.1536	0.927	-0.1528		0.654	0.454	0.927	-0.153	0.927	-0.151
0.926	-0.216	0.926	-0.1544	0.926	-0.1536		0.655	0.451	0.926	-0.153	0.926	-0.152
0.925	-0.2168	0.925	-0.1544	0.925	-0.1536		0.656	0.449	0.925	-0.154	0.925	-0.152
0.924	-0.2168	0.924	-0.1544	0.924	-0.1536		0.657	0.446	0.924	-0.154	0.924	-0.152
0.923	-0.2176	0.923	-0.1544	0.923	-0.1536		0.658	0.444	0.923	-0.154	0.923	-0.152
0.922	-0.2184	0.922	-0.1552	0.922	-0.1544		0.659	0.441	0.922	-0.155	0.922	-0.152
0.921	-0.2192	0.921	-0.1552	0.921	-0.1544		0.66	0.438	0.921	-0.155	0.921	-0.152
0.92	-0.22	0.92	-0.1552	0.92	-0.1544		0.661	0.436	0.92	-0.155	0.92	-0.153
0.919	-0.2208	0.919	-0.1552	0.919	-0.1544		0.662	0.433	0.919	-0.155	0.919	-0.153
0.918	-0.2208	0.918	-0.156	0.918	-0.1552		0.663	0.431	0.918	-0.155	0.918	-0.153
0.917	-0.2216	0.917	-0.156	0.917	-0.1552		0.664	0.428	0.917	-0.155	0.917	-0.153
0.916	-0.2224	0.916	-0.156	0.916	-0.1552		0.665	0.426	0.916	-0.156	0.916	-0.153
0.915	-0.2232	0.915	-0.156	0.915	-0.156		0.666	0.424	0.915	-0.156	0.915	-0.154
0.914	-0.224	0.914	-0.1568	0.914	-0.156		0.667	0.421	0.914	-0.156	0.914	-0.154
0.913	-0.2248	0.913	-0.1568	0.913	-0.156		0.668	0.419	0.913	-0.156	0.913	-0.154
0.912	-0.2248	0.912	-0.1568	0.912	-0.156		0.669	0.417	0.912	-0.156	0.912	-0.154
0.911	-0.2264	0.911	-0.1576	0.911	-0.156		0.67	0.414	0.911	-0.157	0.911	-0.154
0.91	-0.2264	0.91	-0.1576	0.91	-0.1568		0.671	0.412	0.91	-0.157	0.91	-0.155
0.909	-0.2272	0.909	-0.1576	0.909	-0.1568		0.672	0.41	0.909	-0.157	0.909	-0.155
0.908	-0.228	0.908	-0.1576	0.908	-0.1568		0.673	0.408	0.908	-0.157	0.908	-0.155
0.907	-0.2288	0.907	-0.1576	0.907	-0.1568		0.674	0.405	0.907	-0.157	0.907	-0.155
0.906	-0.2296	0.906	-0.1584	0.906	-0.1576		0.675	0.403	0.906	-0.157	0.906	-0.155
0.905	-0.2296	0.905	-0.1584	0.905	-0.1576		0.676	0.401	0.905	-0.158	0.905	-0.155
0.904	-0.2312	0.904	-0.1584	0.904	-0.1576		0.677	0.399	0.904	-0.158	0.904	-0.156
0.903	-0.2312	0.903	-0.1584	0.903	-0.1576		0.678	0.397	0.903	-0.158	0.903	-0.156
0.902	-0.232	0.902	-0.1592	0.902	-0.1584		0.679	0.395	0.902	-0.158	0.902	-0.156
0.901	-0.2328	0.901	-0.1592	0.901	-0.1584		0.68	0.392	0.901	-0.158	0.901	-0.156
0.9	-0.2336	0.9	-0.1592	0.9	-0.1584		0.681	0.39	0.9	-0.158	0.9	-0.156
0.899	-0.2344	0.899	-0.1592	0.899	-0.1584		0.682	0.388	0.899	-0.158	0.899	-0.156
0.898	-0.2352	0.898	-0.16	0.898	-0.1584		0.683	0.386	0.898	-0.159	0.898	-0.157
0.897	-0.236	0.897	-0.16	0.897	-0.1592		0.684	0.384	0.897	-0.159	0.897	-0.157
0.896	-0.2368	0.896	-0.16	0.896	-0.1592		0.685	0.382	0.896	-0.159	0.896	-0.157
0.895	-0.2376	0.895	-0.16	0.895	-0.1592		0.686	0.38	0.895	-0.159	0.895	-0.157
0.894	-0.2384	0.894	-0.16	0.894	-0.1592		0.687	0.378	0.894	-0.159	0.894	-0.157
0.893	-0.2392	0.893	-0.1608	0.893	-0.1592		0.688	0.376	0.893	-0.16	0.893	-0.157
0.892	-0.24	0.892	-0.1608	0.892	-0.16		0.689	0.374	0.892	-0.16	0.892	-0.158
0.891	-0.24	0.891	-0.1608	0.891	-0.16		0.69	0.372	0.891	-0.16	0.891	-0.158
0.89	-0.2408	0.89	-0.1608	0.89	-0.16		0.691	0.371	0.89	-0.16	0.89	-0.158
0.889	-0.2416	0.889	-0.1616	0.889	-0.16		0.692	0.369	0.889	-0.16	0.889	-0.158
0.888	-0.2424	0.888	-0.1616	0.888	-0.1608		0.693	0.367	0.888	-0.16	0.888	-0.158
0.887	-0.2432	0.887	-0.1616	0.887	-0.1608		0.694	0.365	0.887	-0.161	0.887	-0.158
0.886	-0.244	0.886	-0.1616	0.886	-0.1608		0.695	0.363	0.886	-0.161	0.886	-0.158
0.885	-0.2448	0.885	-0.1624	0.885	-0.1608		0.696	0.361	0.885	-0.161	0.885	-0.159
0.884	-0.2456	0.884	-0.1624	0.884	-0.1608		0.697	0.359	0.884	-0.161	0.884	-0.159
0.883	-0.2464	0.883	-0.1624	0.883	-0.1616		0.698	0.358	0.883	-0.161	0.883	-0.159
0.882	-0.2472	0.882	-0.1624	0.882	-0.1616		0.699	0.356	0.882	-0.161	0.882	-0.159
0.881	-0.248	0.881	-0.1624	0.881	-0.1616		0.7	0.354	0.881	-0.162	0.881	-0.159
0.88	-0.2488	0.88	-0.1632	0.88	-0.1616		0.701	0.352	0.88	-0.162	0.88	-0.159
0.879	-0.2496	0.879	-0.1632	0.879	-0.1624		0.702	0.351	0.879	-0.162	0.879	-0.16
0.878	-0.2504	0.878	-0.1632	0.878	-0.1624		0.703	0.349	0.878	-0.162	0.878	-0.16
0.877	-0.2512	0.877	-0.1632	0.877	-0.1624		0.704	0.347	0.877	-0.162	0.877	-0.16
0.876	-0.252	0.876	-0.164	0.876	-0.1624		0.705	0.346	0.876	-0.162	0.876	-0.16
0.875	-0.2528	0.875	-0.164	0.875	-0.1624		0.706	0.344	0.875	-0.162	0.875	-0.16
0.874	-0.2536	0.874	-0.164	0.874	-0.1632		0.707	0.342	0.874	-0.163	0.874	-0.16
0.873	-0.2552	0.873	-0.164	0.873	-0.1632		0.708	0.341	0.873	-0.163	0.873	-0.16
0.872	-0.256	0.872	-0.164	0.872	-0.1632		0.709	0.339	0.872	-0.163	0.872	-0.161
0.871	-0.2568	0.871	-0.1648	0.871	-0.1632		0.71	0.337	0.871	-0.163	0.871	-0.161
0.87	-0.2576	0.87	-0.1648	0.87	-0.1632		0.711	0.336	0.87	-0.163	0.87	-0.161
0.869	-0.2584	0.869	-0.1648	0.869	-0.164		0.712	0.334	0.869	-0.163	0.869	-0.161
0.868	-0.2592	0.868	-0.1648	0.868	-0.164		0.713	0.333	0.868	-0.164	0.868	-0.161
0.867	-0.26	0.867	-0.1656	0.867	-0.164		0.714	0.331	0.867	-0.164	0.867	-0.161
0.866	-0.2608	0.866	-0.1656	0.866	-0.164		0.715	0.33	0.866	-0.164	0.866	-0.162
0.865	-0.2616	0.865	-0.1656	0.865	-0.1648		0.716	0.328	0.865	-0.164	0.865	-0.162
0.864	-0.2624	0.864	-0.1656	0.864	-0.1648		0.717	0.326	0.864	-0.164	0.864	-0.162
0.863	-0.264	0.863	-0.1656	0.863	-0.1648		0.718	0.325	0.863	-0.164	0.863	-0.162
0.862	-0.2648	0.862	-0.1664	0.862	-0.1648		0.719	0.324	0.862	-0.164	0.862	-0.162
0.861	-0.2656	0.861	-0.1664	0.861	-0.1648		0.72	0.322	0.861	-0.165	0.861	-0.162
0.86	-0.2664	0.86	-0.1664	0.86	-0.1656		0.721	0.321	0.86	-0.165	0.86	-0.162
0.859	-0.2672	0.859	-0.1664	0.859	-0.1656		0.722	0.319	0.859	-0.165	0.859	-0.162
0.858	-0.268	0.858	-0.1672	0.858	-0.1656		0.723	0.317	0.858	-0.165	0.858	-0.163
0.857	-0.2688	0.857	-0.1672	0.857	-0.1656		0.724	0.316	0.857	-0.165	0.857	-0.163
0.856	-0.2696	0.856	-0.1672	0.856	-0.1656		0.725	0.315	0.856	-0.165	0.856	-0.163
0.855	-0.2712	0.855	-0.1672	0.855	-0.1664		0.726	0.313	0.855	-0.166	0.855	-0.163
0.854	-0.272	0.854	-0.168	0.854	-0.1664		0.727	0.312	0.854	-0.166	0.854	-0.163
0.853	-0.2728	0.853	-0.168	0.853	-0.1664		0.728	0.311	0.853	-0.166	0.853	-0.163
0.852	-0.2744	0.852	-0.168	0.852	-0.1664		0.729	0.309	0.852	-0.166	0.852	-0.164
0.851	-0.2752	0.851	-0.168	0.851	-0.1672		0.73	0.308	0.851	-0.166	0.851	-0.164
0.85	-0.276	0.85	-0.168	0.85	-0.1672		0.731	0.306	0.85	-0.166	0.85	-0.164
0.849	-0.2768	0.849	-0.1688	0.849	-0.1672		0.732	0.305	0.849	-0.166	0.849	-0.164
0.848	-0.2776	0.848	-0.1688	0.848	-0.1672		0.733	0.304	0.848	-0.167	0.848	-0.164
0.847	-0.2792	0.847	-0.1688	0.847	-0.168		0.734	0.302	0.847	-0.167	0.847	-0.165
0.846	-0.28	0.846	-0.1688	0.846	-0.168		0.735	0.301	0.846	-0.167	0.846	-0.164
0.845	-0.2808	0.845	-0.1696	0.845	-0.168		0.736	0.3	0.845	-0.167	0.845	-0.165
0.844	-0.2816	0.844	-0.1696	0.844	-0.168		0.737	0.299	0.844	-0.167	0.844	-0.165
0.843	-0.2824	0.843	-0.1696	0.843	-0.168		0.738	0.297	0.843	-0.167	0.843	-0.165
0.842	-0.284	0.842	-0.1696	0.842	-0.1688		0.739	0.296	0.842	-0.168	0.842	-0.165
0.841	-0.2848	0.841	-0.1704	0.841	-0.1688		0.74	0.295	0.841	-0.168	0.841	-0.165
0.84	-0.2856	0.84	-0.1704	0.84	-0.1688		0.741	0.293	0.84	-0.168	0.84	-0.165
0.839	-0.2872	0.839	-0.1704	0.839	-0.1696		0.742	0.292	0.839	-0.168	0.839	-0.166
0.838	-0.288	0.838	-0.1704	0.838	-0.1696		0.743	0.292	0.838	-0.168	0.838	-0.166
0.837	-0.2888	0.837	-0.1712	0.837	-0.1696		0.744	0.29	0.837	-0.168	0.837	-0.166
0.836	-0.2896	0.836	-0.1712	0.836	-0.1696		0.745	0.289	0.836	-0.169	0.836	-0.166
0.835	-0.2912	0.835	-0.1712	0.835	-0.1696		0.746	0.288	0.835	-0.169	0.835	-0.166
0.834	-0.292	0.834	-0.1712	0.834	-0.1704		0.747	0.286	0.834	-0.169	0.834	-0.166
0.833	-0.2928	0.833	-0.172	0.833	-0.1704		0.748	0.285	0.833	-0.169	0.833	-0.167
0.832	-0.2936	0.832	-0.172	0.832	-0.1704		0.749	0.284	0.832	-0.169	0.832	-0.167
0.831	-0.2952	0.831	-0.172	0.831	-0.1704		0.75	0.283	0.831	-0.17	0.831	-0.167
0.83	-0.296	0.83	-0.172	0.83	-0.1712		0.751	0.282	0.83	-0.17	0.83	-0.167
0.829	-0.2968	0.829	-0.1728	0.829	-0.1712		0.752	0.28	0.829	-0.17	0.829	-0.167
0.828	-0.2984	0.828	-0.1728	0.828	-0.1712		0.753	0.279	0.828	-0.17	0.828	-0.168
0.827	-0.2992	0.827	-0.1728	0.827	-0.1712		0.754	0.278	0.827	-0.17	0.827	-0.168
0.826	-0.3	0.826	-0.1736	0.826	-0.172		0.755	0.277	0.826	-0.171	0.826	-0.168
0.825	-0.3016	0.825	-0.1736	0.825	-0.172		0.756	0.276	0.825	-0.171	0.825	-0.168
0.824	-0.3024	0.824	-0.1736	0.824	-0.172		0.757	0.275	0.824	-0.171	0.824	-0.168
0.823	-0.3032	0.823	-0.1736	0.823	-0.1728		0.758	0.274	0.823	-0.171	0.823	-0.168
0.822	-0.3048	0.822	-0.1736	0.822	-0.1728		0.759	0.272	0.822	-0.171	0.822	-0.169
0.821	-0.3056	0.821	-0.1744	0.821	-0.1728		0.76	0.271	0.821	-0.171	0.821	-0.169
0.82	-0.3072	0.82	-0.1744	0.82	-0.1728		0.761	0.27	0.82	-0.172	0.82	-0.169
0.819	-0.308	0.819	-0.1752	0.819	-0.1736		0.762	0.269	0.819	-0.172	0.819	-0.17
0.818	-0.3088	0.818	-0.1752	0.818	-0.1736		0.763	0.268	0.818	-0.172	0.818	-0.17
0.817	-0.3104	0.817	-0.1752	0.817	-0.1744		0.764	0.267	0.817	-0.173	0.817	-0.17
0.816	-0.3112	0.816	-0.176	0.816	-0.1744		0.765	0.266	0.816	-0.173	0.816	-0.17
0.815	-0.312	0.815	-0.176	0.815	-0.1744		0.766	0.265	0.815	-0.173	0.815	-0.17
0.814	-0.3136	0.814	-0.176	0.814	-0.1744		0.767	0.264	0.814	-0.173	0.814	-0.17
0.813	-0.3144	0.813	-0.176	0.813	-0.1744		0.768	0.263	0.813	-0.173	0.813	-0.17
0.812	-0.316	0.812	-0.1768	0.812	-0.1752		0.769	0.262	0.812	-0.173	0.812	-0.171
0.811	-0.3168	0.811	-0.1768	0.811	-0.1752		0.77	0.261	0.811	-0.173	0.811	-0.171
0.81	-0.3184	0.81	-0.1768	0.81	-0.1752		0.771	0.261	0.81	-0.174	0.81	-0.171
0.809	-0.3192	0.809	-0.1768	0.809	-0.1752		0.772	0.26	0.809	-0.174	0.809	-0.171
0.808	-0.32	0.808	-0.1776	0.808	-0.176		0.773	0.259	0.808	-0.174	0.808	-0.171
0.807	-0.3208	0.807	-0.1776	0.807	-0.176		0.774	0.259	0.807	-0.174	0.807	-0.172
0.806	-0.3224	0.806	-0.1776	0.806	-0.176		0.775	0.258	0.806	-0.174	0.806	-0.172
0.805	-0.3232	0.805	-0.1784	0.805	-0.1768		0.776	0.257	0.805	-0.175	0.805	-0.172
0.804	-0.3248	0.804	-0.1784	0.804	-0.1768		0.777	0.255	0.804	-0.175	0.804	-0.172
0.803	-0.3256	0.803	-0.1784	0.803	-0.1768		0.778	0.255	0.803	-0.175	0.803	-0.172
0.802	-0.3272	0.802	-0.1784	0.802	-0.1768		0.779	0.253	0.802	-0.175	0.802	-0.172
0.801	-0.328	0.801	-0.1792	0.801	-0.1776		0.78	0.253	0.801	-0.175	0.801	-0.172
0.8	-0.3288	0.8	-0.1792	0.8	-0.1776		0.781	0.252	0.8	-0.176	0.8	-0.173
0.799	-0.3304	0.799	-0.1792	0.799	-0.1776		0.782	0.251	0.799	-0.176	0.799	-0.173
0.798	-0.3312	0.798	-0.18	0.798	-0.1776		0.783	0.25	0.798	-0.176	0.798	-0.173
0.797	-0.332	0.797	-0.18	0.797	-0.1784		0.784	0.249	0.797	-0.176	0.797	-0.173
0.796	-0.3336	0.796	-0.18	0.796	-0.1784		0.785	0.248	0.796	-0.176	0.796	-0.173
0.795	-0.3344	0.795	-0.18	0.795	-0.1784		0.786	0.248	0.795	-0.177	0.795	-0.174
0.794	-0.3352	0.794	-0.1808	0.794	-0.1792		0.787	0.247	0.794	-0.177	0.794	-0.174
0.793	-0.3368	0.793	-0.1808	0.793	-0.1792		0.788	0.246	0.793	-0.177	0.793	-0.174
0.792	-0.3376	0.792	-0.1808	0.792	-0.1792		0.789	0.245	0.792	-0.177	0.792	-0.174
0.791	-0.3384	0.791	-0.1816	0.791	-0.1792		0.79	0.245	0.791	-0.178	0.791	-0.174
0.79	-0.34	0.79	-0.1816	0.79	-0.18		0.791	0.244	0.79	-0.177	0.79	-0.175
0.789	-0.3408	0.789	-0.1816	0.789	-0.18		0.792	0.243	0.789	-0.178	0.789	-0.175
0.788	-0.3416	0.788	-0.1816	0.788	-0.18		0.793	0.242	0.788	-0.178	0.788	-0.175
0.787	-0.3432	0.787	-0.1824	0.787	-0.18		0.794	0.242	0.787	-0.178	0.787	-0.175
0.786	-0.344	0.786	-0.1824	0.786	-0.1808		0.795	0.241	0.786	-0.178	0.786	-0.175
0.785	-0.3448	0.785	-0.1824	0.785	-0.1808		0.796	0.24	0.785	-0.179	0.785	-0.175
0.784	-0.3456	0.784	-0.1824	0.784	-0.1808		0.797	0.24	0.784	-0.179	0.784	-0.176
0.783	-0.3472	0.783	-0.1832	0.783	-0.1808		0.798	0.239	0.783	-0.179	0.783	-0.176
0.782	-0.348	0.782	-0.1832	0.782	-0.1816		0.799	0.238	0.782	-0.179	0.782	-0.176
0.781	-0.3488	0.781	-0.1832	0.781	-0.1816		0.8	0.237	0.781	-0.179	0.781	-0.176
0.78	-0.3496	0.78	-0.184	0.78	-0.1816		0.801	0.237	0.78	-0.179	0.78	-0.176
0.779	-0.3504	0.779	-0.184	0.779	-0.1816		0.802	0.236	0.779	-0.18	0.779	-0.177
0.778	-0.352	0.778	-0.184	0.778	-0.1824		0.803	0.236	0.778	-0.18	0.778	-0.177
0.777	-0.3528	0.777	-0.184	0.777	-0.1824		0.804	0.235	0.777	-0.18	0.777	-0.177
0.776	-0.3536	0.776	-0.1848	0.776	-0.1824		0.805	0.234	0.776	-0.18	0.776	-0.177
0.775	-0.3544	0.775	-0.1848	0.775	-0.1832		0.806	0.234	0.775	-0.181	0.775	-0.177
0.774	-0.3552	0.774	-0.1848	0.774	-0.1832		0.807	0.233	0.774	-0.181	0.774	-0.178
0.773	-0.356	0.773	-0.1848	0.773	-0.1832		0.808	0.233	0.773	-0.181	0.773	-0.178
0.772	-0.3568	0.772	-0.1856	0.772	-0.1832		0.809	0.232	0.772	-0.181	0.772	-0.178
0.771	-0.3584	0.771	-0.1856	0.771	-0.184		0.81	0.231	0.771	-0.181	0.771	-0.178
0.77	-0.3592	0.77	-0.1856	0.77	-0.184		0.811	0.231	0.77	-0.181	0.77	-0.178
0.769	-0.36	0.769	-0.1864	0.769	-0.184		0.812	0.23	0.769	-0.182	0.769	-0.178
0.768	-0.3608	0.768	-0.1864	0.768	-0.1848		0.813	0.23	0.768	-0.182	0.768	-0.179
0.767	-0.3616	0.767	-0.1864	0.767	-0.1848		0.814	0.229	0.767	-0.182	0.767	-0.179
0.766	-0.3624	0.766	-0.1872	0.766	-0.1848		0.815	0.228	0.766	-0.182	0.766	-0.179
0.765	-0.3632	0.765	-0.1872	0.765	-0.1848		0.816	0.228	0.765	-0.183	0.765	-0.179
0.764	-0.364	0.764	-0.1872	0.764	-0.1856		0.817	0.228	0.764	-0.183	0.764	-0.179
0.763	-0.3648	0.763	-0.1872	0.763	-0.1856		0.818	0.227	0.763	-0.183	0.763	-0.179
0.762	-0.3656	0.762	-0.188	0.762	-0.1856		0.819	0.227	0.762	-0.183	0.762	-0.18
0.761	-0.3664	0.761	-0.188	0.761	-0.1864		0.82	0.227	0.761	-0.183	0.761	-0.18
0.76	-0.3672	0.76	-0.188	0.76	-0.1864		0.821	0.226	0.76	-0.183	0.76	-0.18
0.759	-0.3672	0.759	-0.1888	0.759	-0.1864		0.822	0.225	0.759	-0.184	0.759	-0.18
0.758	-0.368	0.758	-0.1888	0.758	-0.1864		0.823	0.225	0.758	-0.184	0.758	-0.181
0.757	-0.3688	0.757	-0.1888	0.757	-0.1872		0.824	0.224	0.757	-0.184	0.757	-0.181
0.756	-0.3696	0.756	-0.1888	0.756	-0.1872		0.825	0.224	0.756	-0.184	0.756	-0.181
0.755	-0.3704	0.755	-0.1896	0.755	-0.1872		0.826	0.224	0.755	-0.185	0.755	-0.181
0.754	-0.3712	0.754	-0.1896	0.754	-0.1872		0.827	0.223	0.754	-0.185	0.754	-0.182
0.753	-0.3712	0.753	-0.1896	0.753	-0.188		0.828	0.223	0.753	-0.185	0.753	-0.182
0.752	-0.372	0.752	-0.1896	0.752	-0.188		0.829	0.222	0.752	-0.185	0.752	-0.182
0.751	-0.3728	0.751	-0.1904	0.751	-0.188		0.83	0.222	0.751	-0.185	0.751	-0.182
0.75	-0.3736	0.75	-0.1904	0.75	-0.188		0.831	0.221	0.75	-0.186	0.75	-0.182
0.749	-0.3744	0.749	-0.1912	0.749	-0.1888		0.832	0.221	0.749	-0.186	0.749	-0.182
0.748	-0.3744	0.748	-0.1912	0.748	-0.1888		0.833	0.221	0.748	-0.186	0.748	-0.183
0.747	-0.3752	0.747	-0.1912	0.747	-0.1888		0.834	0.22	0.747	-0.186	0.747	-0.183
0.746	-0.376	0.746	-0.1912	0.746	-0.1896		0.835	0.22	0.746	-0.187	0.746	-0.183
0.745	-0.376	0.745	-0.192	0.745	-0.1896		0.836	0.219	0.745	-0.187	0.745	-0.183
0.744	-0.3768	0.744	-0.192	0.744	-0.1896		0.837	0.219	0.744	-0.187	0.744	-0.183
0.743	-0.3776	0.743	-0.192	0.743	-0.1904		0.838	0.218	0.743	-0.187	0.743	-0.184
0.742	-0.3776	0.742	-0.192	0.742	-0.1904		0.839	0.218	0.742	-0.187	0.742	-0.184
0.741	-0.3784	0.741	-0.1928	0.741	-0.1904		0.84	0.218	0.741	-0.188	0.741	-0.184
0.74	-0.3784	0.74	-0.1928	0.74	-0.1912		0.841	0.217	0.74	-0.188	0.74	-0.184
0.739	-0.3792	0.739	-0.1928	0.739	-0.1912		0.842	0.217	0.739	-0.188	0.739	-0.184
0.738	-0.3792	0.738	-0.1936	0.738	-0.1912		0.843	0.216	0.738	-0.188	0.738	-0.185
0.737	-0.38	0.737	-0.1936	0.737	-0.1912		0.844	0.216	0.737	-0.189	0.737	-0.185
0.736	-0.3808	0.736	-0.1936	0.736	-0.192		0.845	0.216	0.736	-0.189	0.736	-0.185
0.735	-0.3808	0.735	-0.1944	0.735	-0.192		0.846	0.215	0.735	-0.189	0.735	-0.185
0.734	-0.3816	0.734	-0.1944	0.734	-0.192		0.847	0.215	0.734	-0.189	0.734	-0.186
0.733	-0.3816	0.733	-0.1944	0.733	-0.1928		0.848	0.215	0.733	-0.19	0.733	-0.186
0.732	-0.3824	0.732	-0.1952	0.732	-0.1928		0.849	0.214	0.732	-0.19	0.732	-0.186
0.731	-0.3824	0.731	-0.1952	0.731	-0.1928		0.85	0.214	0.731	-0.19	0.731	-0.186
0.73	-0.3832	0.73	-0.196	0.73	-0.1936		0.851	0.214	0.73	-0.191	0.73	-0.187
0.729	-0.3832	0.729	-0.196	0.729	-0.1936		0.852	0.213	0.729	-0.191	0.729	-0.187
0.728	-0.3832	0.728	-0.196	0.728	-0.1936		0.853	0.213	0.728	-0.191	0.728	-0.187
0.727	-0.384	0.727	-0.1968	0.727	-0.1944		0.854	0.212	0.727	-0.191	0.727	-0.187
0.726	-0.384	0.726	-0.1968	0.726	-0.1944		0.855	0.212	0.726	-0.191	0.726	-0.188
0.725	-0.3848	0.725	-0.1968	0.725	-0.1952		0.856	0.212	0.725	-0.192	0.725	-0.188
0.724	-0.3848	0.724	-0.1976	0.724	-0.1952		0.857	0.211	0.724	-0.192	0.724	-0.188
0.723	-0.3856	0.723	-0.1976	0.723	-0.1952		0.858	0.211	0.723	-0.192	0.723	-0.188
0.722	-0.3856	0.722	-0.1976	0.722	-0.196		0.859	0.211	0.722	-0.193	0.722	-0.189
0.721	-0.3856	0.721	-0.1984	0.721	-0.196		0.86	0.211	0.721	-0.193	0.721	-0.189
0.72	-0.3864	0.72	-0.1984	0.72	-0.196		0.861	0.21	0.72	-0.193	0.72	-0.189
0.719	-0.3864	0.719	-0.1992	0.719	-0.1968		0.862	0.21	0.719	-0.194	0.719	-0.19
0.718	-0.3864	0.718	-0.1992	0.718	-0.1968		0.863	0.209	0.718	-0.194	0.718	-0.19
0.717	-0.3872	0.717	-0.1992	0.717	-0.1976		0.864	0.209	0.717	-0.194	0.717	-0.19
0.716	-0.3872	0.716	-0.2	0.716	-0.1976		0.865	0.209	0.716	-0.195	0.716	-0.191
0.715	-0.3872	0.715	-0.2	0.715	-0.1984		0.866	0.209	0.715	-0.195	0.715	-0.191
0.714	-0.388	0.714	-0.2008	0.714	-0.1984		0.867	0.208	0.714	-0.195	0.714	-0.191
0.713	-0.388	0.713	-0.2008	0.713	-0.1984		0.868	0.208	0.713	-0.195	0.713	-0.191
0.712	-0.388	0.712	-0.2008	0.712	-0.1992		0.869	0.208	0.712	-0.196	0.712	-0.192
0.711	-0.3888	0.711	-0.2016	0.711	-0.1992		0.87	0.207	0.711	-0.196	0.711	-0.192
0.71	-0.3888	0.71	-0.2016	0.71	-0.2		0.871	0.207	0.71	-0.196	0.71	-0.192
0.709	-0.3888	0.709	-0.2024	0.709	-0.2		0.872	0.207	0.709	-0.197	0.709	-0.193
0.708	-0.3896	0.708	-0.2024	0.708	-0.2008		0.873	0.206	0.708	-0.197	0.708	-0.193
0.707	-0.3896	0.707	-0.2032	0.707	-0.2008		0.874	0.206	0.707	-0.197	0.707	-0.193
0.706	-0.3896	0.706	-0.2032	0.706	-0.2016		0.875	0.206	0.706	-0.198	0.706	-0.194
0.705	-0.3896	0.705	-0.204	0.705	-0.2016		0.876	0.206	0.705	-0.198	0.705	-0.194
0.704	-0.3904	0.704	-0.204	0.704	-0.2016		0.877	0.205	0.704	-0.198	0.704	-0.194
0.703	-0.3904	0.703	-0.2048	0.703	-0.2024		0.878	0.205	0.703	-0.199	0.703	-0.195
0.702	-0.3904	0.702	-0.2048	0.702	-0.2024		0.879	0.205	0.702	-0.199	0.702	-0.195
0.701	-0.3904	0.701	-0.2056	0.701	-0.2032		0.88	0.204	0.701	-0.2	0.701	-0.195
0.7	-0.3904	0.7	-0.2056	0.7	-0.204		0.881	0.204	0.7	-0.2	0.7	-0.196
0.699	-0.3912	0.699	-0.2056	0.699	-0.204		0.882	0.204	0.699	-0.2	0.699	-0.196
0.698	-0.3912	0.698	-0.2064	0.698	-0.2048		0.883	0.204	0.698	-0.201	0.698	-0.197
0.697	-0.3912	0.697	-0.2064	0.697	-0.2048		0.884	0.204	0.697	-0.201	0.697	-0.197
0.696	-0.3912	0.696	-0.2072	0.696	-0.2056		0.885	0.203	0.696	-0.202	0.696	-0.197
0.695	-0.3912	0.695	-0.2064	0.695	-0.2056		0.886	0.203	0.695	-0.202	0.695	-0.198
0.694	-0.392	0.694	-0.2064	0.694	-0.2064		0.887	0.202	0.694	-0.202	0.694	-0.198
0.693	-0.392	0.693	-0.2072	0.693	-0.2064		0.888	0.202	0.693	-0.203	0.693	-0.198
0.692	-0.392	0.692	-0.208	0.692	-0.2056		0.889	0.202	0.692	-0.203	0.692	-0.199
0.691	-0.392	0.691	-0.208	0.691	-0.2064		0.89	0.202	0.691	-0.204	0.691	-0.199
0.69	-0.392	0.69	-0.2088	0.69	-0.2064		0.891	0.202	0.69	-0.204	0.69	-0.2
0.689	-0.392	0.689	-0.2088	0.689	-0.2072		0.892	0.201	0.689	-0.205	0.689	-0.2
0.688	-0.3928	0.688	-0.2096	0.688	-0.2072		0.893	0.201	0.688	-0.205	0.688	-0.201
0.687	-0.3928	0.687	-0.2096	0.687	-0.208		0.894	0.201	0.687	-0.206	0.687	-0.201
0.686	-0.3928	0.686	-0.2104	0.686	-0.208		0.895	0.201	0.686	-0.206	0.686	-0.201
0.685	-0.3928	0.685	-0.2112	0.685	-0.2088		0.896	0.2	0.685	-0.206	0.685	-0.202
0.684	-0.3928	0.684	-0.2112	0.684	-0.2088		0.897	0.2	0.684	-0.207	0.684	-0.202
0.683	-0.3936	0.683	-0.212	0.683	-0.2096		0.898	0.2	0.683	-0.207	0.683	-0.203
0.682	-0.3936	0.682	-0.212	0.682	-0.2104		0.899	0.2	0.682	-0.208	0.682	-0.203
0.681	-0.3936	0.681	-0.2128	0.681	-0.2104		0.9	0.199	0.681	-0.208	0.681	-0.204
0.68	-0.3936	0.68	-0.2128	0.68	-0.2112		0.901	0.199	0.68	-0.209	0.68	-0.204
0.679	-0.3936	0.679	-0.2136	0.679	-0.212		0.902	0.199	0.679	-0.209	0.679	-0.205
0.678	-0.3936	0.678	-0.2144	0.678	-0.212		0.903	0.199	0.678	-0.21	0.678	-0.205
0.677	-0.3936	0.677	-0.2144	0.677	-0.2128		0.904	0.198	0.677	-0.21	0.677	-0.206
0.676	-0.3944	0.676	-0.2152	0.676	-0.2128		0.905	0.198	0.676	-0.211	0.676	-0.206
0.675	-0.3944	0.675	-0.2152	0.675	-0.2136		0.906	0.198	0.675	-0.211	0.675	-0.206
0.674	-0.3944	0.674	-0.216	0.674	-0.2144		0.907	0.198	0.674	-0.212	0.674	-0.207
0.673	-0.3944	0.673	-0.2168	0.673	-0.2152		0.908	0.198	0.673	-0.212	0.673	-0.207
0.672	-0.3944	0.672	-0.2168	0.672	-0.2152		0.909	0.198	0.672	-0.213	0.672	-0.208
0.671	-0.3944	0.671	-0.2176	0.671	-0.216		0.91	0.197	0.671	-0.213	0.671	-0.209
0.67	-0.3944	0.67	-0.2176	0.67	-0.216		0.911	0.197	0.67	-0.214	0.67	-0.209
0.669	-0.3952	0.669	-0.2184	0.669	-0.2168		0.912	0.197	0.669	-0.214	0.669	-0.209
0.668	-0.3952	0.668	-0.2192	0.668	-0.2176		0.913	0.198	0.668	-0.215	0.668	-0.21
0.667	-0.3952	0.667	-0.2192	0.667	-0.2176		0.914	0.198	0.667	-0.215	0.667	-0.21
0.666	-0.3952	0.666	-0.22	0.666	-0.2184		0.915	0.197	0.666	-0.216	0.666	-0.211
0.665	-0.3952	0.665	-0.2208	0.665	-0.2184		0.916	0.196	0.665	-0.216	0.665	-0.212
0.664	-0.3952	0.664	-0.2208	0.664	-0.2192		0.917	0.196	0.664	-0.217	0.664	-0.212
0.663	-0.3952	0.663	-0.2216	0.663	-0.22		0.918	0.196	0.663	-0.218	0.663	-0.213
0.662	-0.3952	0.662	-0.2224	0.662	-0.22		0.919	0.196	0.662	-0.218	0.662	-0.213
0.661	-0.396	0.661	-0.2232	0.661	-0.2208		0.92	0.195	0.661	-0.219	0.661	-0.214
0.66	-0.396	0.66	-0.2232	0.66	-0.2216		0.921	0.195	0.66	-0.219	0.66	-0.214
0.659	-0.396	0.659	-0.224	0.659	-0.2216		0.922	0.195	0.659	-0.22	0.659	-0.215
0.658	-0.396	0.658	-0.224	0.658	-0.2232		0.923	0.195	0.658	-0.22	0.658	-0.215
0.657	-0.396	0.657	-0.2248	0.657	-0.2232		0.924	0.195	0.657	-0.221	0.657	-0.216
0.656	-0.396	0.656	-0.2256	0.656	-0.224		0.925	0.195	0.656	-0.221	0.656	-0.216
0.655	-0.396	0.655	-0.2264	0.655	-0.224		0.926	0.195	0.655	-0.222	0.655	-0.217
0.654	-0.3968	0.654	-0.2264	0.654	-0.2248		0.927	0.194	0.654	-0.222	0.654	-0.217
0.653	-0.3968	0.653	-0.2272	0.653	-0.2256		0.928	0.194	0.653	-0.223	0.653	-0.218
0.652	-0.3968	0.652	-0.2272	0.652	-0.2264		0.929	0.194	0.652	-0.224	0.652	-0.218
0.651	-0.3968	0.651	-0.228	0.651	-0.2264		0.93	0.194	0.651	-0.224	0.651	-0.219
0.65	-0.3968	0.65	-0.2288	0.65	-0.2272		0.931	0.194	0.65	-0.225	0.65	-0.219
0.649	-0.3968	0.649	-0.2288	0.649	-0.2272		0.932	0.193	0.649	-0.225	0.649	-0.22
0.648	-0.3976	0.648	-0.2296	0.648	-0.228		0.933	0.193	0.648	-0.226	0.648	-0.221
0.647	-0.3976	0.647	-0.2304	0.647	-0.2288		0.934	0.193	0.647	-0.226	0.647	-0.221
0.646	-0.3976	0.646	-0.2312	0.646	-0.2288		0.935	0.193	0.646	-0.227	0.646	-0.222
0.645	-0.3976	0.645	-0.2312	0.645	-0.2296		0.936	0.193	0.645	-0.228	0.645	-0.222
0.644	-0.3976	0.644	-0.232	0.644	-0.2304		0.937	0.192	0.644	-0.228	0.644	-0.223
0.643	-0.3976	0.643	-0.2328	0.643	-0.2312		0.938	0.192	0.643	-0.229	0.643	-0.223
0.642	-0.3984	0.642	-0.2328	0.642	-0.2312		0.939	0.192	0.642	-0.229	0.642	-0.224
0.641	-0.3984	0.641	-0.2336	0.641	-0.232		0.94	0.193	0.641	-0.23	0.641	-0.225
0.64	-0.3984	0.64	-0.2344	0.64	-0.2328		0.941	0.192	0.64	-0.23	0.64	-0.225
0.639	-0.3984	0.639	-0.2352	0.639	-0.2328		0.942	0.192	0.639	-0.231	0.639	-0.226
0.638	-0.3984	0.638	-0.2352	0.638	-0.2336		0.943	0.192	0.638	-0.232	0.638	-0.226
0.637	-0.3992	0.637	-0.236	0.637	-0.2344		0.944	0.191	0.637	-0.232	0.637	-0.227
0.636	-0.3992	0.636	-0.2368	0.636	-0.2352		0.945	0.191	0.636	-0.233	0.636	-0.228
0.635	-0.3992	0.635	-0.2368	0.635	-0.2352		0.946	0.191	0.635	-0.233	0.635	-0.228
0.634	-0.3992	0.634	-0.2376	0.634	-0.236		0.947	0.191	0.634	-0.234	0.634	-0.228
0.633	-0.3992	0.633	-0.2384	0.633	-0.2368		0.948	0.191	0.633	-0.235	0.633	-0.229
0.632	-0.3992	0.632	-0.2384	0.632	-0.2368		0.949	0.19	0.632	-0.235	0.632	-0.23
0.631	-0.4	0.631	-0.2392	0.631	-0.2376		0.95	0.19	0.631	-0.236	0.631	-0.23
0.63	-0.4	0.63	-0.24	0.63	-0.2384		0.951	0.19	0.63	-0.237	0.63	-0.231
0.629	-0.4	0.629	-0.24	0.629	-0.2392		0.952	0.19	0.629	-0.237	0.629	-0.232
0.628	-0.4	0.628	-0.2408	0.628	-0.2392		0.953	0.19	0.628	-0.238	0.628	-0.232
0.627	-0.4008	0.627	-0.2416	0.627	-0.24		0.954	0.19	0.627	-0.238	0.627	-0.233
0.626	-0.4008	0.626	-0.2424	0.626	-0.2408		0.955	0.189	0.626	-0.239	0.626	-0.233
0.625	-0.4008	0.625	-0.2424	0.625	-0.2408		0.956	0.189	0.625	-0.239	0.625	-0.234
0.624	-0.4008	0.624	-0.2432	0.624	-0.2416		0.957	0.189	0.624	-0.24	0.624	-0.235
0.623	-0.4016	0.623	-0.244	0.623	-0.2424		0.958	0.189	0.623	-0.241	0.623	-0.235
0.622	-0.4016	0.622	-0.244	0.622	-0.2432		0.959	0.189	0.622	-0.241	0.622	-0.236
0.621	-0.4016	0.621	-0.2448	0.621	-0.2432		0.96	0.189	0.621	-0.242	0.621	-0.236
0.62	-0.4016	0.62	-0.2456	0.62	-0.244		0.961	0.189	0.62	-0.243	0.62	-0.237
0.619	-0.4024	0.619	-0.2456	0.619	-0.2448		0.962	0.188	0.619	-0.243	0.619	-0.237
0.618	-0.4024	0.618	-0.2472	0.618	-0.2448		0.963	0.188	0.618	-0.244	0.618	-0.238
0.617	-0.4024	0.617	-0.2472	0.617	-0.2456		0.964	0.188	0.617	-0.244	0.617	-0.239
0.616	-0.4032	0.616	-0.248	0.616	-0.2464		0.965	0.188	0.616	-0.245	0.616	-0.239
0.615	-0.4032	0.615	-0.2488	0.615	-0.2472		0.966	0.188	0.615	-0.246	0.615	-0.24
0.614	-0.4032	0.614	-0.2488	0.614	-0.248		0.967	0.188	0.614	-0.246	0.614	-0.241
0.613	-0.4032	0.613	-0.2496	0.613	-0.248		0.968	0.187	0.613	-0.247	0.613	-0.241
0.612	-0.404	0.612	-0.2504	0.612	-0.2488		0.969	0.187	0.612	-0.248	0.612	-0.242
0.611	-0.404	0.611	-0.2512	0.611	-0.2496		0.97	0.187	0.611	-0.248	0.611	-0.242
0.61	-0.404	0.61	-0.2512	0.61	-0.2504		0.971	0.187	0.61	-0.249	0.61	-0.243
0.609	-0.4048	0.609	-0.252	0.609	-0.2504		0.972	0.187	0.609	-0.249	0.609	-0.244
0.608	-0.4048	0.608	-0.2528	0.608	-0.2512		0.973	0.187	0.608	-0.25	0.608	-0.244
0.607	-0.4048	0.607	-0.2536	0.607	-0.252		0.974	0.187	0.607	-0.251	0.607	-0.245
0.606	-0.4056	0.606	-0.2536	0.606	-0.252		0.975	0.187	0.606	-0.251	0.606	-0.245
0.605	-0.4056	0.605	-0.2544	0.605	-0.2528		0.976	0.186	0.605	-0.252	0.605	-0.246
0.604	-0.4056	0.604	-0.2552	0.604	-0.2536		0.977	0.186	0.604	-0.253	0.604	-0.247
0.603	-0.4064	0.603	-0.2552	0.603	-0.2544		0.978	0.186	0.603	-0.253	0.603	-0.247
0.602	-0.4064	0.602	-0.256	0.602	-0.2552		0.979	0.186	0.602	-0.254	0.602	-0.248
0.601	-0.4072	0.601	-0.2568	0.601	-0.2552		0.98	0.186	0.601	-0.255	0.601	-0.249
0.6	-0.4072	0.6	-0.2576	0.6	-0.256		0.981	0.186	0.6	-0.255	0.6	-0.249
0.599	-0.4072	0.599	-0.2576	0.599	-0.2568		0.982	0.186	0.599	-0.256	0.599	-0.25
0.598	-0.408	0.598	-0.2584	0.598	-0.2568		0.983	0.186	0.598	-0.256	0.598	-0.25
0.597	-0.408	0.597	-0.2592	0.597	-0.2576		0.984	0.185	0.597	-0.257	0.597	-0.251
0.596	-0.408	0.596	-0.26	0.596	-0.2584		0.985	0.185	0.596	-0.258	0.596	-0.252
0.595	-0.4088	0.595	-0.2608	0.595	-0.2592		0.986	0.185	0.595	-0.258	0.595	-0.252
0.594	-0.4096	0.594	-0.2608	0.594	-0.26		0.987	0.185	0.594	-0.259	0.594	-0.253
0.593	-0.4096	0.593	-0.2616	0.593	-0.26		0.988	0.185	0.593	-0.26	0.593	-0.254
0.592	-0.4096	0.592	-0.2624	0.592	-0.2608		0.989	0.185	0.592	-0.26	0.592	-0.254
0.591	-0.4104	0.591	-0.2632	0.591	-0.2616		0.99	0.185	0.591	-0.261	0.591	-0.255
0.59	-0.4104	0.59	-0.2632	0.59	-0.2624		0.991	0.185	0.59	-0.262	0.59	-0.255
0.589	-0.4112	0.589	-0.264	0.589	-0.2632		0.992	0.184	0.589	-0.262	0.589	-0.256
0.588	-0.4112	0.588	-0.2648	0.588	-0.2632		0.993	0.184	0.588	-0.263	0.588	-0.257
0.587	-0.412	0.587	-0.2656	0.587	-0.264		0.994	0.184	0.587	-0.263	0.587	-0.257
0.586	-0.412	0.586	-0.2656	0.586	-0.2648		0.995	0.184	0.586	-0.264	0.586	-0.258
0.585	-0.4128	0.585	-0.2664	0.585	-0.2656		0.996	0.184	0.585	-0.265	0.585	-0.259
0.584	-0.4128	0.584	-0.2672	0.584	-0.2664		0.997	0.183	0.584	-0.266	0.584	-0.259
0.583	-0.4136	0.583	-0.268	0.583	-0.2664		0.998	0.184	0.583	-0.266	0.583	-0.26
0.582	-0.4136	0.582	-0.2688	0.582	-0.2672		0.999	0.183	0.582	-0.267	0.582	-0.261
0.581	-0.4144	0.581	-0.2688	0.581	-0.268		1	0.183	0.581	-0.266	0.581	-0.261
0.58	-0.4144	0.58	-0.2696	0.58	-0.2688		1.001	0.183	0.58	-0.267	0.58	-0.262
0.579	-0.4152	0.579	-0.2704	0.579	-0.2688		1.002	0.183	0.579	-0.267	0.579	-0.263
0.578	-0.4152	0.578	-0.2712	0.578	-0.2696		1.003	0.183	0.578	-0.268	0.578	-0.263
0.577	-0.416	0.577	-0.2712	0.577	-0.2704		1.004	0.183	0.577	-0.269	0.577	-0.264
0.576	-0.416	0.576	-0.272	0.576	-0.2712		1.005	0.183	0.576	-0.269	0.576	-0.265
0.575	-0.4168	0.575	-0.2728	0.575	-0.272		1.006	0.182	0.575	-0.27	0.575	-0.265
0.574	-0.4176	0.574	-0.2736	0.574	-0.2728		1.007	0.182	0.574	-0.271	0.574	-0.266
0.573	-0.4176	0.573	-0.2744	0.573	-0.2728		1.008	0.182	0.573	-0.271	0.573	-0.267
0.572	-0.4184	0.572	-0.2752	0.572	-0.2736		1.009	0.182	0.572	-0.272	0.572	-0.266
0.571	-0.4184	0.571	-0.2752	0.571	-0.2744		1.01	0.182	0.571	-0.273	0.571	-0.266
0.57	-0.4192	0.57	-0.276	0.57	-0.2752		1.011	0.182	0.57	-0.274	0.57	-0.267
0.569	-0.4192	0.569	-0.2768	0.569	-0.276		1.012	0.182	0.569	-0.274	0.569	-0.268
0.568	-0.42	0.568	-0.2776	0.568	-0.276		1.013	0.182	0.568	-0.275	0.568	-0.268
0.567	-0.4208	0.567	-0.2784	0.567	-0.2768		1.014	0.181	0.567	-0.276	0.567	-0.269
0.566	-0.4208	0.566	-0.2784	0.566	-0.2776		1.015	0.181	0.566	-0.276	0.566	-0.27
0.565	-0.4216	0.565	-0.2792	0.565	-0.2784		1.016	0.181	0.565	-0.277	0.565	-0.271
0.564	-0.4224	0.564	-0.28	0.564	-0.2792		1.017	0.181	0.564	-0.278	0.564	-0.271
0.563	-0.4224	0.563	-0.2808	0.563	-0.28		1.018	0.181	0.563	-0.279	0.563	-0.272
0.562	-0.4232	0.562	-0.2816	0.562	-0.2808		1.019	0.18	0.562	-0.279	0.562	-0.273
0.561	-0.424	0.561	-0.2816	0.561	-0.2808		1.02	0.18	0.561	-0.28	0.561	-0.273
0.56	-0.424	0.56	-0.2824	0.56	-0.2816		1.021	0.18	0.56	-0.281	0.56	-0.274
0.559	-0.4248	0.559	-0.2832	0.559	-0.2824		1.022	0.18	0.559	-0.281	0.559	-0.275
0.558	-0.4256	0.558	-0.284	0.558	-0.2832		1.023	0.18	0.558	-0.282	0.558	-0.275
0.557	-0.4256	0.557	-0.2848	0.557	-0.284		1.024	0.18	0.557	-0.283	0.557	-0.276
0.556	-0.4264	0.556	-0.2856	0.556	-0.2848		1.025	0.18	0.556	-0.284	0.556	-0.277
0.555	-0.4272	0.555	-0.2864	0.555	-0.2848		1.026	0.18	0.555	-0.284	0.555	-0.278
0.554	-0.4272	0.554	-0.2864	0.554	-0.2856		1.027	0.179	0.554	-0.285	0.554	-0.278
0.553	-0.428	0.553	-0.2872	0.553	-0.2864		1.028	0.179	0.553	-0.285	0.553	-0.279
0.552	-0.4288	0.552	-0.288	0.552	-0.2872		1.029	0.179	0.552	-0.286	0.552	-0.28
0.551	-0.4296	0.551	-0.2888	0.551	-0.288		1.03	0.179	0.551	-0.287	0.551	-0.281
0.55	-0.4296	0.55	-0.2896	0.55	-0.2888		1.031	0.178	0.55	-0.288	0.55	-0.281
0.549	-0.4304	0.549	-0.2904	0.549	-0.2896		1.032	0.178	0.549	-0.289	0.549	-0.282
0.548	-0.4312	0.548	-0.2912	0.548	-0.2904		1.033	0.178	0.548	-0.289	0.548	-0.282
0.547	-0.4312	0.547	-0.2912	0.547	-0.2912		1.034	0.178	0.547	-0.29	0.547	-0.283
0.546	-0.432	0.546	-0.292	0.546	-0.2912		1.035	0.178	0.546	-0.291	0.546	-0.284
0.545	-0.4328	0.545	-0.2928	0.545	-0.292		1.036	0.178	0.545	-0.292	0.545	-0.285
0.544	-0.4336	0.544	-0.2936	0.544	-0.2928		1.037	0.178	0.544	-0.292	0.544	-0.285
0.543	-0.4344	0.543	-0.2944	0.543	-0.2936		1.038	0.177	0.543	-0.293	0.543	-0.286
0.542	-0.4344	0.542	-0.2952	0.542	-0.2944		1.039	0.177	0.542	-0.294	0.542	-0.287
0.541	-0.4352	0.541	-0.2952	0.541	-0.2952		1.04	0.177	0.541	-0.295	0.541	-0.288
0.54	-0.436	0.54	-0.296	0.54	-0.296		1.041	0.177	0.54	-0.295	0.54	-0.288
0.539	-0.4368	0.539	-0.2968	0.539	-0.296		1.042	0.177	0.539	-0.296	0.539	-0.289
0.538	-0.4368	0.538	-0.2976	0.538	-0.2968		1.043	0.177	0.538	-0.297	0.538	-0.29
0.537	-0.4376	0.537	-0.2984	0.537	-0.2976		1.044	0.177	0.537	-0.298	0.537	-0.291
0.536	-0.4384	0.536	-0.2992	0.536	-0.2984		1.045	0.176	0.536	-0.298	0.536	-0.292
0.535	-0.4392	0.535	-0.3	0.535	-0.2992		1.046	0.176	0.535	-0.299	0.535	-0.292
0.534	-0.4392	0.534	-0.3	0.534	-0.3		1.047	0.176	0.534	-0.3	0.534	-0.293
0.533	-0.44	0.533	-0.3016	0.533	-0.3008		1.048	0.176	0.533	-0.301	0.533	-0.294
0.532	-0.4408	0.532	-0.3024	0.532	-0.3016		1.049	0.176	0.532	-0.302	0.532	-0.295
0.531	-0.4416	0.531	-0.3024	0.531	-0.3024		1.05	0.175	0.531	-0.302	0.531	-0.295
0.53	-0.4424	0.53	-0.3032	0.53	-0.3032		1.051	0.175	0.53	-0.303	0.53	-0.296
0.529	-0.4424	0.529	-0.304	0.529	-0.304		1.052	0.175	0.529	-0.304	0.529	-0.297
0.528	-0.4432	0.528	-0.3048	0.528	-0.304		1.053	0.175	0.528	-0.305	0.528	-0.297
0.527	-0.444	0.527	-0.3056	0.527	-0.3048		1.054	0.175	0.527	-0.305	0.527	-0.298
0.526	-0.4448	0.526	-0.3064	0.526	-0.3056		1.055	0.175	0.526	-0.306	0.526	-0.299
0.525	-0.4456	0.525	-0.3072	0.525	-0.3064		1.056	0.174	0.525	-0.307	0.525	-0.3
0.524	-0.4464	0.524	-0.308	0.524	-0.3072		1.057	0.174	0.524	-0.308	0.524	-0.301
0.523	-0.4464	0.523	-0.308	0.523	-0.308		1.058	0.174	0.523	-0.309	0.523	-0.302
0.522	-0.4472	0.522	-0.3088	0.522	-0.3088		1.059	0.174	0.522	-0.309	0.522	-0.302
0.521	-0.448	0.521	-0.3104	0.521	-0.3096		1.06	0.174	0.521	-0.31	0.521	-0.303
0.52	-0.4488	0.52	-0.3104	0.52	-0.3104		1.061	0.174	0.52	-0.311	0.52	-0.304
0.519	-0.4496	0.519	-0.3112	0.519	-0.3112		1.062	0.174	0.519	-0.312	0.519	-0.305
0.518	-0.4504	0.518	-0.312	0.518	-0.312		1.063	0.173	0.518	-0.313	0.518	-0.305
0.517	-0.4512	0.517	-0.3128	0.517	-0.3128		1.064	0.173	0.517	-0.313	0.517	-0.306
0.516	-0.4512	0.516	-0.3136	0.516	-0.3136		1.065	0.173	0.516	-0.314	0.516	-0.307
0.515	-0.452	0.515	-0.3144	0.515	-0.3144		1.066	0.173	0.515	-0.315	0.515	-0.308
0.514	-0.4528	0.514	-0.3152	0.514	-0.3152		1.067	0.173	0.514	-0.316	0.514	-0.309
0.513	-0.4536	0.513	-0.316	0.513	-0.316		1.068	0.173	0.513	-0.317	0.513	-0.309
0.512	-0.4544	0.512	-0.3168	0.512	-0.3168		1.069	0.172	0.512	-0.318	0.512	-0.31
0.511	-0.4552	0.511	-0.3176	0.511	-0.3176		1.07	0.172	0.511	-0.319	0.511	-0.311
0.51	-0.456	0.51	-0.3184	0.51	-0.3184		1.071	0.172	0.51	-0.319	0.51	-0.312
0.509	-0.456	0.509	-0.3192	0.509	-0.3192		1.072	0.172	0.509	-0.32	0.509	-0.313
0.508	-0.4576	0.508	-0.32	0.508	-0.32		1.073	0.172	0.508	-0.321	0.508	-0.313
0.507	-0.4576	0.507	-0.3208	0.507	-0.3208		1.074	0.171	0.507	-0.322	0.507	-0.314
0.506	-0.4584	0.506	-0.3216	0.506	-0.3216		1.075	0.171	0.506	-0.323	0.506	-0.315
0.505	-0.4592	0.505	-0.3224	0.505	-0.3224		1.076	0.171	0.505	-0.324	0.505	-0.316
0.504	-0.46	0.504	-0.3232	0.504	-0.3232		1.077	0.171	0.504	-0.324	0.504	-0.317
0.503	-0.4608	0.503	-0.324	0.503	-0.324		1.078	0.171	0.503	-0.325	0.503	-0.318
0.502	-0.4616	0.502	-0.3248	0.502	-0.3248		1.079	0.171	0.502	-0.326	0.502	-0.318
0.501	-0.4624	0.501	-0.3256	0.501	-0.3256		1.08	0.17	0.501	-0.327	0.501	-0.319
0.5	-0.4632	0.5	-0.3264	0.5	-0.3264		1.081	0.17	0.5	-0.328	0.5	-0.32
0.499	-0.464	0.499	-0.3272	0.499	-0.3272		1.082	0.17	0.499	-0.329	0.499	-0.321
0.498	-0.4648	0.498	-0.328	0.498	-0.328		1.083	0.17	0.498	-0.33	0.498	-0.322
0.497	-0.4648	0.497	-0.3288	0.497	-0.3288		1.084	0.17	0.497	-0.331	0.497	-0.323
0.496	-0.4656	0.496	-0.3296	0.496	-0.3296		1.085	0.169	0.496	-0.331	0.496	-0.323
0.495	-0.4664	0.495	-0.3304	0.495	-0.3304		1.086	0.169	0.495	-0.332	0.495	-0.324
0.494	-0.4672	0.494	-0.3312	0.494	-0.3312		1.087	0.169	0.494	-0.333	0.494	-0.325
0.493	-0.468	0.493	-0.332	0.493	-0.332		1.088	0.169	0.493	-0.334	0.493	-0.326
0.492	-0.4688	0.492	-0.3328	0.492	-0.3328		1.089	0.168	0.492	-0.335	0.492	-0.327
0.491	-0.4696	0.491	-0.3328	0.491	-0.3336		1.09	0.168	0.491	-0.336	0.491	-0.328
0.49	-0.4704	0.49	-0.3344	0.49	-0.3344		1.091	0.168	0.49	-0.337	0.49	-0.329
0.489	-0.4712	0.489	-0.3352	0.489	-0.3352		1.092	0.168	0.489	-0.337	0.489	-0.33
0.488	-0.472	0.488	-0.336	0.488	-0.336		1.093	0.168	0.488	-0.338	0.488	-0.33
0.487	-0.4728	0.487	-0.3368	0.487	-0.3368		1.094	0.167	0.487	-0.339	0.487	-0.331
0.486	-0.4736	0.486	-0.3376	0.486	-0.3376		1.095	0.167	0.486	-0.34	0.486	-0.332
0.485	-0.4736	0.485	-0.3384	0.485	-0.3384		1.096	0.167	0.485	-0.341	0.485	-0.333
0.484	-0.4744	0.484	-0.3392	0.484	-0.3392		1.097	0.167	0.484	-0.342	0.484	-0.334
0.483	-0.4752	0.483	-0.34	0.483	-0.34		1.098	0.167	0.483	-0.343	0.483	-0.335
0.482	-0.476	0.482	-0.3408	0.482	-0.3416		1.099	0.166	0.482	-0.344	0.482	-0.336
0.481	-0.4768	0.481	-0.3416	0.481	-0.3424		1.1	0.166	0.481	-0.345	0.481	-0.337
0.48	-0.4776	0.48	-0.3424	0.48	-0.3432		1.101	0.166	0.48	-0.346	0.48	-0.337
0.479	-0.4784	0.479	-0.3432	0.479	-0.344		1.102	0.166	0.479	-0.347	0.479	-0.338
0.478	-0.4792	0.478	-0.344	0.478	-0.3448		1.103	0.165	0.478	-0.348	0.478	-0.339
0.477	-0.48	0.477	-0.3448	0.477	-0.3456		1.104	0.165	0.477	-0.349	0.477	-0.34
0.476	-0.4808	0.476	-0.3456	0.476	-0.3464		1.105	0.165	0.476	-0.35	0.476	-0.341
0.475	-0.4816	0.475	-0.3464	0.475	-0.3472		1.106	0.165	0.475	-0.35	0.475	-0.342
0.474	-0.4824	0.474	-0.3472	0.474	-0.348		1.107	0.165	0.474	-0.352	0.474	-0.343
0.473	-0.4832	0.473	-0.348	0.473	-0.3488		1.108	0.164	0.473	-0.352	0.473	-0.344
0.472	-0.484	0.472	-0.3496	0.472	-0.3496		1.109	0.164	0.472	-0.353	0.472	-0.344
0.471	-0.4848	0.471	-0.3504	0.471	-0.3504		1.11	0.164	0.471	-0.354	0.471	-0.346
0.47	-0.4856	0.47	-0.3512	0.47	-0.3512		1.111	0.164	0.47	-0.355	0.47	-0.346
0.469	-0.4864	0.469	-0.352	0.469	-0.352		1.112	0.163	0.469	-0.356	0.469	-0.347
0.468	-0.4872	0.468	-0.3528	0.468	-0.3536		1.113	0.163	0.468	-0.357	0.468	-0.348
0.467	-0.488	0.467	-0.3536	0.467	-0.3544		1.114	0.163	0.467	-0.358	0.467	-0.349
0.466	-0.4888	0.466	-0.3544	0.466	-0.3552		1.115	0.162	0.466	-0.359	0.466	-0.35
0.465	-0.4896	0.465	-0.3552	0.465	-0.356		1.116	0.162	0.465	-0.36	0.465	-0.351
0.464	-0.4896	0.464	-0.356	0.464	-0.3568		1.117	0.162	0.464	-0.361	0.464	-0.352
0.463	-0.4904	0.463	-0.3568	0.463	-0.3576		1.118	0.162	0.463	-0.362	0.463	-0.353
0.462	-0.4912	0.462	-0.3576	0.462	-0.3584		1.119	0.162	0.462	-0.363	0.462	-0.354
0.461	-0.4928	0.461	-0.3592	0.461	-0.36		1.12	0.161	0.461	-0.364	0.461	-0.355
0.46	-0.4928	0.46	-0.36	0.46	-0.3608		1.121	0.161	0.46	-0.365	0.46	-0.356
0.459	-0.4936	0.459	-0.3608	0.459	-0.3616		1.122	0.161	0.459	-0.366	0.459	-0.357
0.458	-0.4944	0.458	-0.3616	0.458	-0.3624		1.123	0.161	0.458	-0.367	0.458	-0.358
0.457	-0.4952	0.457	-0.3624	0.457	-0.3632		1.124	0.161	0.457	-0.368	0.457	-0.359
0.456	-0.496	0.456	-0.3632	0.456	-0.364		1.125	0.16	0.456	-0.369	0.456	-0.36
0.455	-0.4968	0.455	-0.364	0.455	-0.3656		1.126	0.16	0.455	-0.37	0.455	-0.361
0.454	-0.4976	0.454	-0.3648	0.454	-0.3664		1.127	0.16	0.454	-0.371	0.454	-0.362
0.453	-0.4984	0.453	-0.3656	0.453	-0.3672		1.128	0.159	0.453	-0.372	0.453	-0.363
0.452	-0.4992	0.452	-0.3672	0.452	-0.368		1.129	0.159	0.452	-0.373	0.452	-0.364
0.451	-0.5	0.451	-0.368	0.451	-0.3688		1.13	0.159	0.451	-0.374	0.451	-0.365
0.45	-0.5008	0.45	-0.3688	0.45	-0.3696		1.131	0.159	0.45	-0.375	0.45	-0.366
0.449	-0.5016	0.449	-0.3696	0.449	-0.3704		1.132	0.158	0.449	-0.376	0.449	-0.367
0.448	-0.5024	0.448	-0.3704	0.448	-0.3712		1.133	0.158	0.448	-0.377	0.448	-0.368
0.447	-0.5032	0.447	-0.3712	0.447	-0.3728		1.134	0.158	0.447	-0.378	0.447	-0.369
0.446	-0.504	0.446	-0.372	0.446	-0.3736		1.135	0.158	0.446	-0.379	0.446	-0.37
0.445	-0.5048	0.445	-0.3736	0.445	-0.3744		1.136	0.158	0.445	-0.38	0.445	-0.371
0.444	-0.5056	0.444	-0.3744	0.444	-0.3752		1.137	0.157	0.444	-0.381	0.444	-0.372
0.443	-0.5064	0.443	-0.3752	0.443	-0.376		1.138	0.157	0.443	-0.382	0.443	-0.373
0.442	-0.5072	0.442	-0.376	0.442	-0.3776		1.139	0.157	0.442	-0.383	0.442	-0.374
0.441	-0.508	0.441	-0.3768	0.441	-0.3784		1.14	0.156	0.441	-0.384	0.441	-0.375
0.44	-0.5088	0.44	-0.3784	0.44	-0.3792		1.141	0.156	0.44	-0.385	0.44	-0.376
0.439	-0.5096	0.439	-0.3792	0.439	-0.38		1.142	0.156	0.439	-0.386	0.439	-0.377
0.438	-0.5104	0.438	-0.38	0.438	-0.3816		1.143	0.156	0.438	-0.387	0.438	-0.378
0.437	-0.5112	0.437	-0.3808	0.437	-0.3824		1.144	0.155	0.437	-0.388	0.437	-0.379
0.436	-0.512	0.436	-0.3816	0.436	-0.3832		1.145	0.155	0.436	-0.389	0.436	-0.38
0.435	-0.5128	0.435	-0.3824	0.435	-0.384		1.146	0.155	0.435	-0.39	0.435	-0.381
0.434	-0.5136	0.434	-0.384	0.434	-0.3856		1.147	0.155	0.434	-0.391	0.434	-0.382
0.433	-0.5144	0.433	-0.3848	0.433	-0.3864		1.148	0.154	0.433	-0.393	0.433	-0.382
0.432	-0.5152	0.432	-0.3856	0.432	-0.3872		1.149	0.154	0.432	-0.393	0.432	-0.384
0.431	-0.516	0.431	-0.3864	0.431	-0.388		1.15	0.154	0.431	-0.394	0.431	-0.385
0.43	-0.5168	0.43	-0.3872	0.43	-0.3888		1.151	0.154	0.43	-0.396	0.43	-0.385
0.429	-0.5176	0.429	-0.3888	0.429	-0.3896		1.152	0.154	0.429	-0.397	0.429	-0.387
0.428	-0.5184	0.428	-0.3896	0.428	-0.3912		1.153	0.153	0.428	-0.398	0.428	-0.388
0.427	-0.5192	0.427	-0.3904	0.427	-0.392		1.154	0.153	0.427	-0.399	0.427	-0.388
0.426	-0.52	0.426	-0.3912	0.426	-0.3928		1.155	0.153	0.426	-0.4	0.426	-0.39
0.425	-0.5208	0.425	-0.392	0.425	-0.3936		1.156	0.152	0.425	-0.401	0.425	-0.391
0.424	-0.5216	0.424	-0.3936	0.424	-0.3952		1.157	0.152	0.424	-0.402	0.424	-0.392
0.423	-0.5224	0.423	-0.3944	0.423	-0.396		1.158	0.152	0.423	-0.403	0.423	-0.393
0.422	-0.5232	0.422	-0.3952	0.422	-0.3968		1.159	0.152	0.422	-0.404	0.422	-0.394
0.421	-0.524	0.421	-0.396	0.421	-0.3976		1.16	0.151	0.421	-0.405	0.421	-0.395
0.42	-0.5248	0.42	-0.3976	0.42	-0.3992		1.161	0.151	0.42	-0.406	0.42	-0.396
0.419	-0.5256	0.419	-0.3984	0.419	-0.4		1.162	0.151	0.419	-0.407	0.419	-0.397
0.418	-0.5264	0.418	-0.3992	0.418	-0.4008		1.163	0.151	0.418	-0.409	0.418	-0.398
0.417	-0.5272	0.417	-0.4	0.417	-0.4016		1.164	0.15	0.417	-0.409	0.417	-0.399
0.416	-0.528	0.416	-0.4016	0.416	-0.4032		1.165	0.15	0.416	-0.41	0.416	-0.4
0.415	-0.5288	0.415	-0.4024	0.415	-0.404		1.166	0.15	0.415	-0.412	0.415	-0.402
0.414	-0.5296	0.414	-0.4032	0.414	-0.4048		1.167	0.149	0.414	-0.413	0.414	-0.402
0.413	-0.5304	0.413	-0.404	0.413	-0.4056		1.168	0.149	0.413	-0.414	0.413	-0.403
0.412	-0.5312	0.412	-0.4056	0.412	-0.4072		1.169	0.149	0.412	-0.415	0.412	-0.405
0.411	-0.532	0.411	-0.4064	0.411	-0.408		1.17	0.148	0.411	-0.416	0.411	-0.406
0.41	-0.5328	0.41	-0.4072	0.41	-0.4096		1.171	0.148	0.41	-0.418	0.41	-0.407
0.409	-0.5336	0.409	-0.4088	0.409	-0.4104		1.172	0.148	0.409	-0.419	0.409	-0.408
0.408	-0.5344	0.408	-0.4096	0.408	-0.4112		1.173	0.148	0.408	-0.42	0.408	-0.409
0.407	-0.5352	0.407	-0.4104	0.407	-0.4128		1.174	0.147	0.407	-0.421	0.407	-0.41
0.406	-0.536	0.406	-0.4112	0.406	-0.4136		1.175	0.147	0.406	-0.422	0.406	-0.411
0.405	-0.5368	0.405	-0.4128	0.405	-0.4144		1.176	0.147	0.405	-0.423	0.405	-0.413
0.404	-0.5376	0.404	-0.4136	0.404	-0.4152		1.177	0.146	0.404	-0.425	0.404	-0.413
0.403	-0.5384	0.403	-0.4144	0.403	-0.416		1.178	0.146	0.403	-0.426	0.403	-0.415
0.402	-0.5392	0.402	-0.4152	0.402	-0.4176		1.179	0.146	0.402	-0.427	0.402	-0.416
0.401	-0.54	0.401	-0.4168	0.401	-0.4184		1.18	0.146	0.401	-0.428	0.401	-0.417
0.4	-0.5408	0.4	-0.4176	0.4	-0.4192		1.181	0.145	0.4	-0.429	0.4	-0.418
0.399	-0.5416	0.399	-0.4184	0.399	-0.4208		1.182	0.145	0.399	-0.43	0.399	-0.419
0.398	-0.5424	0.398	-0.4192	0.398	-0.4216		1.183	0.145	0.398	-0.431	0.398	-0.42
0.397	-0.5432	0.397	-0.4208	0.397	-0.4224		1.184	0.145	0.397	-0.432	0.397	-0.421
0.396	-0.544	0.396	-0.4216	0.396	-0.424		1.185	0.144	0.396	-0.434	0.396	-0.423
0.395	-0.5448	0.395	-0.4224	0.395	-0.4248		1.186	0.144	0.395	-0.435	0.395	-0.424
0.394	-0.5456	0.394	-0.424	0.394	-0.4264		1.187	0.143	0.394	-0.436	0.394	-0.425
0.393	-0.5464	0.393	-0.4248	0.393	-0.4272		1.188	0.143	0.393	-0.437	0.393	-0.426
0.392	-0.5472	0.392	-0.4256	0.392	-0.428		1.189	0.143	0.392	-0.438	0.392	-0.427
0.391	-0.548	0.391	-0.4272	0.391	-0.4296		1.19	0.143	0.391	-0.44	0.391	-0.428
0.39	-0.5488	0.39	-0.428	0.39	-0.4304		1.191	0.142	0.39	-0.441	0.39	-0.429
0.389	-0.5496	0.389	-0.4288	0.389	-0.4312		1.192	0.142	0.389	-0.442	0.389	-0.431
0.388	-0.5504	0.388	-0.4304	0.388	-0.4328		1.193	0.142	0.388	-0.443	0.388	-0.432
0.387	-0.5512	0.387	-0.4312	0.387	-0.4336		1.194	0.142	0.387	-0.444	0.387	-0.433
0.386	-0.552	0.386	-0.432	0.386	-0.4344		1.195	0.141	0.386	-0.445	0.386	-0.434
0.385	-0.5528	0.385	-0.4336	0.385	-0.436		1.196	0.141	0.385	-0.447	0.385	-0.435
0.384	-0.5536	0.384	-0.4344	0.384	-0.4368		1.197	0.141	0.384	-0.448	0.384	-0.436
0.383	-0.5544	0.383	-0.4352	0.383	-0.4384		1.198	0.14	0.383	-0.449	0.383	-0.437
0.382	-0.556	0.382	-0.4368	0.382	-0.4392		1.199	0.14	0.382	-0.45	0.382	-0.438
0.381	-0.5568	0.381	-0.4376	0.381	-0.44		1.2	0.14	0.381	-0.452	0.381	-0.44
0.38	-0.5576	0.38	-0.4384	0.38	-0.4416		1.201	0.139	0.38	-0.453	0.38	-0.441
0.379	-0.5584	0.379	-0.44	0.379	-0.4424		1.202	0.139	0.379	-0.454	0.379	-0.442
0.378	-0.5592	0.378	-0.4408	0.378	-0.4432		1.203	0.139	0.378	-0.455	0.378	-0.443
0.377	-0.56	0.377	-0.4424	0.377	-0.4448		1.204	0.139	0.377	-0.456	0.377	-0.445
0.376	-0.5608	0.376	-0.4432	0.376	-0.4456		1.205	0.138	0.376	-0.458	0.376	-0.446
0.375	-0.5616	0.375	-0.444	0.375	-0.4472		1.206	0.138	0.375	-0.459	0.375	-0.447
0.374	-0.5624	0.374	-0.4456	0.374	-0.448		1.207	0.138	0.374	-0.46	0.374	-0.448
0.373	-0.5632	0.373	-0.4464	0.373	-0.4496		1.208	0.137	0.373	-0.461	0.373	-0.449
0.372	-0.564	0.372	-0.4472	0.372	-0.4504		1.209	0.137	0.372	-0.463	0.372	-0.451
0.371	-0.5648	0.371	-0.4488	0.371	-0.4512		1.21	0.137	0.371	-0.464	0.371	-0.452
0.37	-0.5656	0.37	-0.4496	0.37	-0.4528		1.211	0.136	0.37	-0.465	0.37	-0.453
0.369	-0.5664	0.369	-0.4512	0.369	-0.4536		1.212	0.136	0.369	-0.466	0.369	-0.454
0.368	-0.5672	0.368	-0.452	0.368	-0.4552		1.213	0.136	0.368	-0.468	0.368	-0.455
0.367	-0.568	0.367	-0.4536	0.367	-0.456		1.214	0.135	0.367	-0.469	0.367	-0.456
0.366	-0.5688	0.366	-0.4544	0.366	-0.4576		1.215	0.135	0.366	-0.47	0.366	-0.458
0.365	-0.5696	0.365	-0.4552	0.365	-0.4584		1.216	0.135	0.365	-0.472	0.365	-0.459
0.364	-0.5712	0.364	-0.4568	0.364	-0.4592		1.217	0.134	0.364	-0.473	0.364	-0.46
0.363	-0.572	0.363	-0.4576	0.363	-0.4608		1.218	0.134	0.363	-0.474	0.363	-0.462
0.362	-0.5728	0.362	-0.4592	0.362	-0.4616		1.219	0.134	0.362	-0.475	0.362	-0.463
0.361	-0.5736	0.361	-0.46	0.361	-0.4632		1.22	0.133	0.361	-0.476	0.361	-0.464
0.36	-0.5744	0.36	-0.4616	0.36	-0.464		1.221	0.133	0.36	-0.478	0.36	-0.465
0.359	-0.5752	0.359	-0.4624	0.359	-0.4656		1.222	0.133	0.359	-0.479	0.359	-0.467
0.358	-0.576	0.358	-0.464	0.358	-0.4664		1.223	0.132	0.358	-0.481	0.358	-0.468
0.357	-0.5768	0.357	-0.4648	0.357	-0.468		1.224	0.132	0.357	-0.482	0.357	-0.469
0.356	-0.5776	0.356	-0.4656	0.356	-0.4688		1.225	0.132	0.356	-0.483	0.356	-0.471
0.355	-0.5784	0.355	-0.4672	0.355	-0.4704		1.226	0.132	0.355	-0.484	0.355	-0.472
0.354	-0.58	0.354	-0.468	0.354	-0.4712		1.227	0.131	0.354	-0.486	0.354	-0.473
0.353	-0.5808	0.353	-0.4696	0.353	-0.4728		1.228	0.131	0.353	-0.487	0.353	-0.474
0.352	-0.5816	0.352	-0.4704	0.352	-0.4736		1.229	0.131	0.352	-0.488	0.352	-0.475
0.351	-0.5824	0.351	-0.472	0.351	-0.4752		1.23	0.13	0.351	-0.49	0.351	-0.477
0.35	-0.5832	0.35	-0.4728	0.35	-0.476		1.231	0.13	0.35	-0.491	0.35	-0.478
0.349	-0.584	0.349	-0.4744	0.349	-0.4776		1.232	0.13	0.349	-0.492	0.349	-0.479
0.348	-0.5848	0.348	-0.4752	0.348	-0.4784		1.233	0.129	0.348	-0.494	0.348	-0.481
0.347	-0.5856	0.347	-0.4768	0.347	-0.48		1.234	0.129	0.347	-0.495	0.347	-0.482
0.346	-0.5864	0.346	-0.4776	0.346	-0.4808		1.235	0.128	0.346	-0.496	0.346	-0.483
0.345	-0.588	0.345	-0.4784	0.345	-0.4824		1.236	0.128	0.345	-0.498	0.345	-0.485
0.344	-0.5888	0.344	-0.48	0.344	-0.4832		1.237	0.128	0.344	-0.499	0.344	-0.486
0.343	-0.5896	0.343	-0.4816	0.343	-0.4848		1.238	0.126	0.343	-0.5	0.343	-0.487
0.342	-0.5904	0.342	-0.4824	0.342	-0.4856		1.239	0.125	0.342	-0.502	0.342	-0.488
0.341	-0.5912	0.341	-0.4832	0.341	-0.4872		1.24	0.125	0.341	-0.503	0.341	-0.49
0.34	-0.592	0.34	-0.4848	0.34	-0.4888		1.241	0.125	0.34	-0.505	0.34	-0.491
0.339	-0.5936	0.339	-0.4856	0.339	-0.4896		1.242	0.125	0.339	-0.506	0.339	-0.492
0.338	-0.5944	0.338	-0.4872	0.338	-0.4912		1.243	0.124	0.338	-0.507	0.338	-0.494
0.337	-0.5952	0.337	-0.4888	0.337	-0.492		1.244	0.124	0.337	-0.509	0.337	-0.495
0.336	-0.596	0.336	-0.4896	0.336	-0.4936		1.245	0.123	0.336	-0.51	0.336	-0.496
0.335	-0.5968	0.335	-0.4912	0.335	-0.4944		1.246	0.123	0.335	-0.511	0.335	-0.498
0.334	-0.5976	0.334	-0.492	0.334	-0.496		1.247	0.123	0.334	-0.513	0.334	-0.499
0.333	-0.5984	0.333	-0.4936	0.333	-0.4976		1.248	0.122	0.333	-0.514	0.333	-0.5
0.332	-0.6	0.332	-0.4944	0.332	-0.4984		1.249	0.122	0.332	-0.515	0.332	-0.502
0.331	-0.6008	0.331	-0.496	0.331	-0.5		1.25	0.122	0.331	-0.516	0.331	-0.503
0.33	-0.6016	0.33	-0.4968	0.33	-0.5008		1.251	0.121	0.33	-0.518	0.33	-0.504
0.329	-0.6024	0.329	-0.4984	0.329	-0.5024		1.252	0.121	0.329	-0.519	0.329	-0.506
0.328	-0.604	0.328	-0.4992	0.328	-0.504		1.253	0.121	0.328	-0.521	0.328	-0.507
0.327	-0.6048	0.327	-0.5008	0.327	-0.5048		1.254	0.12	0.327	-0.522	0.327	-0.508
0.326	-0.6056	0.326	-0.5016	0.326	-0.5064		1.255	0.12	0.326	-0.523	0.326	-0.51
0.325	-0.6064	0.325	-0.5032	0.325	-0.5072		1.256	0.119	0.325	-0.525	0.325	-0.511
0.324	-0.6072	0.324	-0.5048	0.324	-0.5088		1.257	0.119	0.324	-0.526	0.324	-0.513
0.323	-0.6088	0.323	-0.5056	0.323	-0.5096		1.258	0.119	0.323	-0.527	0.323	-0.514
0.322	-0.6096	0.322	-0.5072	0.322	-0.5112		1.259	0.118	0.322	-0.529	0.322	-0.515
0.321	-0.6104	0.321	-0.508	0.321	-0.5128		1.26	0.118	0.321	-0.531	0.321	-0.517
0.32	-0.6112	0.32	-0.5096	0.32	-0.5136		1.261	0.118	0.32	-0.532	0.32	-0.518
0.319	-0.612	0.319	-0.5104	0.319	-0.5152		1.262	0.118	0.319	-0.533	0.319	-0.52
0.318	-0.6136	0.318	-0.512	0.318	-0.5168		1.263	0.117	0.318	-0.535	0.318	-0.521
0.317	-0.6144	0.317	-0.5136	0.317	-0.5176		1.264	0.117	0.317	-0.536	0.317	-0.522
0.316	-0.6152	0.316	-0.5144	0.316	-0.5192		1.265	0.116	0.316	-0.537	0.316	-0.524
0.315	-0.616	0.315	-0.516	0.315	-0.5208		1.266	0.116	0.315	-0.539	0.315	-0.525
0.314	-0.6176	0.314	-0.5168	0.314	-0.5216		1.267	0.116	0.314	-0.54	0.314	-0.527
0.313	-0.6184	0.313	-0.5184	0.313	-0.5232		1.268	0.115	0.313	-0.542	0.313	-0.528
0.312	-0.6192	0.312	-0.5192	0.312	-0.5248		1.269	0.115	0.312	-0.543	0.312	-0.529
0.311	-0.62	0.311	-0.5208	0.311	-0.5256		1.27	0.115	0.311	-0.544	0.311	-0.531
0.31	-0.6208	0.31	-0.5224	0.31	-0.5272		1.271	0.114	0.31	-0.546	0.31	-0.532
0.309	-0.6224	0.309	-0.524	0.309	-0.5288		1.272	0.114	0.309	-0.547	0.309	-0.534
0.308	-0.6232	0.308	-0.5248	0.308	-0.5296		1.273	0.114	0.308	-0.549	0.308	-0.535
0.307	-0.624	0.307	-0.5264	0.307	-0.5312		1.274	0.113	0.307	-0.55	0.307	-0.537
0.306	-0.6256	0.306	-0.5272	0.306	-0.5328		1.275	0.113	0.306	-0.552	0.306	-0.538
0.305	-0.6264	0.305	-0.5288	0.305	-0.5344		1.276	0.113	0.305	-0.553	0.305	-0.54
0.304	-0.6272	0.304	-0.5296	0.304	-0.5352		1.277	0.112	0.304	-0.554	0.304	-0.541
0.303	-0.6288	0.303	-0.5312	0.303	-0.5368		1.278	0.112	0.303	-0.556	0.303	-0.543
0.302	-0.6296	0.302	-0.5328	0.302	-0.5384		1.279	0.111	0.302	-0.557	0.302	-0.544
0.301	-0.6304	0.301	-0.5336	0.301	-0.54		1.28	0.111	0.301	-0.559	0.301	-0.545
0.3	-0.632	0.3	-0.5352	0.3	-0.5408		1.281	0.111	0.3	-0.56	0.3	-0.547
0.299	-0.6328	0.299	-0.5368	0.299	-0.5424		1.282	0.11	0.299	-0.562	0.299	-0.548
0.298	-0.6336	0.298	-0.5376	0.298	-0.544		1.283	0.11	0.298	-0.563	0.298	-0.55
0.297	-0.6344	0.297	-0.5392	0.297	-0.5456		1.284	0.11	0.297	-0.565	0.297	-0.552
0.296	-0.636	0.296	-0.54	0.296	-0.5464		1.285	0.109	0.296	-0.566	0.296	-0.553
0.295	-0.6368	0.295	-0.5416	0.295	-0.548		1.286	0.109	0.295	-0.568	0.295	-0.554
0.294	-0.6376	0.294	-0.5432	0.294	-0.5496		1.287	0.109	0.294	-0.569	0.294	-0.556
0.293	-0.6392	0.293	-0.544	0.293	-0.5512		1.288	0.108	0.293	-0.57	0.293	-0.557
0.292	-0.64	0.292	-0.5456	0.292	-0.5528		1.289	0.108	0.292	-0.572	0.292	-0.559
0.291	-0.6408	0.291	-0.5472	0.291	-0.5536		1.29	0.108	0.291	-0.573	0.291	-0.56
0.29	-0.6424	0.29	-0.548	0.29	-0.5552		1.291	0.107	0.29	-0.575	0.29	-0.562
0.289	-0.6432	0.289	-0.5496	0.289	-0.5568		1.292	0.107	0.289	-0.576	0.289	-0.563
0.288	-0.644	0.288	-0.5512	0.288	-0.5584		1.293	0.107	0.288	-0.577	0.288	-0.565
0.287	-0.6456	0.287	-0.552	0.287	-0.5592		1.294	0.106	0.287	-0.579	0.287	-0.566
0.286	-0.6464	0.286	-0.5536	0.286	-0.5608		1.295	0.106	0.286	-0.58	0.286	-0.568
0.285	-0.648	0.285	-0.5552	0.285	-0.5624		1.296	0.105	0.285	-0.582	0.285	-0.57
0.284	-0.6488	0.284	-0.556	0.284	-0.564		1.297	0.105	0.284	-0.583	0.284	-0.571
0.283	-0.6496	0.283	-0.5576	0.283	-0.5656		1.298	0.105	0.283	-0.584	0.283	-0.572
0.282	-0.6512	0.282	-0.5584	0.282	-0.5672		1.299	0.104	0.282	-0.586	0.282	-0.574
0.281	-0.652	0.281	-0.56	0.281	-0.5688		1.3	0.104	0.281	-0.587	0.281	-0.576
0.28	-0.6536	0.28	-0.5616	0.28	-0.5696		1.301	0.104	0.28	-0.589	0.28	-0.577
0.279	-0.6544	0.279	-0.5632	0.279	-0.5712		1.302	0.103	0.279	-0.59	0.279	-0.579
0.278	-0.6552	0.278	-0.564	0.278	-0.5728		1.303	0.103	0.278	-0.591	0.278	-0.58
0.277	-0.6568	0.277	-0.5656	0.277	-0.5744		1.304	0.103	0.277	-0.593	0.277	-0.582
0.276	-0.6576	0.276	-0.5664	0.276	-0.576		1.305	0.102	0.276	-0.594	0.276	-0.583
0.275	-0.6592	0.275	-0.568	0.275	-0.5776		1.306	0.102	0.275	-0.596	0.275	-0.585
0.274	-0.66	0.274	-0.5696	0.274	-0.5784		1.307	0.102	0.274	-0.597	0.274	-0.587
0.273	-0.6608	0.273	-0.5704	0.273	-0.58		1.308	0.101	0.273	-0.598	0.273	-0.588
0.272	-0.6624	0.272	-0.572	0.272	-0.5816		1.309	0.101	0.272	-0.6	0.272	-0.589
0.271	-0.6632	0.271	-0.5736	0.271	-0.5832		1.31	0.101	0.271	-0.601	0.271	-0.591
0.27	-0.6648	0.27	-0.5744	0.27	-0.5848		1.311	0.1	0.27	-0.603	0.27	-0.593
0.269	-0.6664	0.269	-0.576	0.269	-0.5864		1.312	0.1	0.269	-0.604	0.269	-0.594
0.268	-0.6672	0.268	-0.5768	0.268	-0.588		1.313	0.0996	0.268	-0.605	0.268	-0.596
0.267	-0.668	0.267	-0.5784	0.267	-0.5896		1.314	0.0994	0.267	-0.607	0.267	-0.597
0.266	-0.6696	0.266	-0.58	0.266	-0.5912		1.315	0.099	0.266	-0.608	0.266	-0.599
0.265	-0.6704	0.265	-0.5808	0.265	-0.5928		1.316	0.0987	0.265	-0.609	0.265	-0.601
0.264	-0.672	0.264	-0.5824	0.264	-0.5936		1.317	0.0984	0.264	-0.611	0.264	-0.602
0.263	-0.6728	0.263	-0.584	0.263	-0.596		1.318	0.0981	0.263	-0.612	0.263	-0.604
0.262	-0.6744	0.262	-0.5848	0.262	-0.5968		1.319	0.0976	0.262	-0.614	0.262	-0.605
0.261	-0.6752	0.261	-0.5864	0.261	-0.5984		1.32	0.0974	0.261	-0.615	0.261	-0.607
0.26	-0.6768	0.26	-0.588	0.26	-0.6		1.321	0.0971	0.26	-0.616	0.26	-0.608
0.259	-0.6776	0.259	-0.5888	0.259	-0.6016		1.322	0.0967	0.259	-0.618	0.259	-0.61
0.258	-0.6792	0.258	-0.5904	0.258	-0.6032		1.323	0.0963	0.258	-0.619	0.258	-0.612
0.257	-0.68	0.257	-0.5912	0.257	-0.6048		1.324	0.096	0.257	-0.62	0.257	-0.613
0.256	-0.6816	0.256	-0.5928	0.256	-0.6064		1.325	0.0957	0.256	-0.622	0.256	-0.615
0.255	-0.6824	0.255	-0.5944	0.255	-0.608		1.326	0.0953	0.255	-0.623	0.255	-0.617
0.254	-0.684	0.254	-0.5952	0.254	-0.6096		1.327	0.095	0.254	-0.624	0.254	-0.618
0.253	-0.6848	0.253	-0.5968	0.253	-0.6112		1.328	0.0947	0.253	-0.625	0.253	-0.62
0.252	-0.6864	0.252	-0.5976	0.252	-0.6128		1.329	0.0943	0.252	-0.627	0.252	-0.622
0.251	-0.6872	0.251	-0.5992	0.251	-0.6144		1.33	0.094	0.251	-0.628	0.251	-0.623
0.25	-0.6888	0.25	-0.6008	0.25	-0.616		1.331	0.0938	0.25	-0.629	0.25	-0.625
0.249	-0.6904	0.249	-0.6016	0.249	-0.6176		1.332	0.0934	0.249	-0.631	0.249	-0.626
0.248	-0.6912	0.248	-0.6032	0.248	-0.6192		1.333	0.093	0.248	-0.632	0.248	-0.628
0.247	-0.6928	0.247	-0.6048	0.247	-0.6208		1.334	0.0927	0.247	-0.633	0.247	-0.629
0.246	-0.6944	0.246	-0.6056	0.246	-0.6224		1.335	0.0924	0.246	-0.634	0.246	-0.631
0.245	-0.696	0.245	-0.6072	0.245	-0.624		1.336	0.0921	0.245	-0.635	0.245	-0.633
0.244	-0.696	0.244	-0.6088	0.244	-0.6256		1.337	0.0919	0.244	-0.637	0.244	-0.634
0.243	-0.6976	0.243	-0.6096	0.243	-0.6272		1.338	0.0914	0.243	-0.638	0.243	-0.636
0.242	-0.6992	0.242	-0.6104	0.242	-0.6288		1.339	0.0912	0.242	-0.639	0.242	-0.638
0.241	-0.7008	0.241	-0.612	0.241	-0.6304		1.34	0.0909	0.241	-0.64	0.241	-0.639
0.24	-0.7016	0.24	-0.6136	0.24	-0.632		1.341	0.0905	0.24	-0.641	0.24	-0.641
0.239	-0.7032	0.239	-0.6144	0.239	-0.6336		1.342	0.0903	0.239	-0.643	0.239	-0.642
0.238	-0.7048	0.238	-0.616	0.238	-0.6352		1.343	0.0899	0.238	-0.644	0.238	-0.644
0.237	-0.7064	0.237	-0.6168	0.237	-0.6368		1.344	0.0896	0.237	-0.645	0.237	-0.645
0.236	-0.7072	0.236	-0.6184	0.236	-0.6392		1.345	0.0893	0.236	-0.646	0.236	-0.647
0.235	-0.7088	0.235	-0.62	0.235	-0.6408		1.346	0.0889	0.235	-0.647	0.235	-0.649
0.234	-0.7104	0.234	-0.6208	0.234	-0.6424		1.347	0.0888	0.234	-0.648	0.234	-0.65
0.233	-0.7112	0.233	-0.6224	0.233	-0.644		1.348	0.0885	0.233	-0.649	0.233	-0.652
0.232	-0.7128	0.232	-0.6232	0.232	-0.6456		1.349	0.0881	0.232	-0.65	0.232	-0.654
0.231	-0.7144	0.231	-0.6248	0.231	-0.6472		1.35	0.0878	0.231	-0.652	0.231	-0.655
0.23	-0.716	0.23	-0.6256	0.23	-0.6488		1.351	0.0876	0.23	-0.653	0.23	-0.657
0.229	-0.7168	0.229	-0.6272	0.229	-0.6504		1.352	0.0873	0.229	-0.654	0.229	-0.658
0.228	-0.7184	0.228	-0.6288	0.228	-0.652		1.353	0.087	0.228	-0.655	0.228	-0.66
0.227	-0.72	0.227	-0.6296	0.227	-0.6536		1.354	0.0868	0.227	-0.655	0.227	-0.662
0.226	-0.7208	0.226	-0.6312	0.226	-0.656		1.355	0.0864	0.226	-0.657	0.226	-0.663
0.225	-0.7224	0.225	-0.632	0.225	-0.6576		1.356	0.0862	0.225	-0.658	0.225	-0.665
0.224	-0.724	0.224	-0.6336	0.224	-0.6592		1.357	0.0859	0.224	-0.659	0.224	-0.666
0.223	-0.7256	0.223	-0.6344	0.223	-0.6608		1.358	0.0855	0.223	-0.66	0.223	-0.668
0.222	-0.7264	0.222	-0.636	0.222	-0.6624		1.359	0.0853	0.222	-0.661	0.222	-0.67
0.221	-0.728	0.221	-0.6368	0.221	-0.664		1.36	0.085	0.221	-0.662	0.221	-0.671
0.22	-0.7296	0.22	-0.6384	0.22	-0.6664		1.361	0.0848	0.22	-0.663	0.22	-0.673
0.219	-0.7304	0.219	-0.64	0.219	-0.6672		1.362	0.0845	0.219	-0.663	0.219	-0.675
0.218	-0.732	0.218	-0.6408	0.218	-0.6696		1.363	0.0842	0.218	-0.665	0.218	-0.676
0.217	-0.7344	0.217	-0.6424	0.217	-0.6712		1.364	0.084	0.217	-0.665	0.217	-0.678
0.216	-0.7352	0.216	-0.6432	0.216	-0.6728		1.365	0.0837	0.216	-0.666	0.216	-0.679
0.215	-0.7368	0.215	-0.6448	0.215	-0.6744		1.366	0.0834	0.215	-0.667	0.215	-0.681
0.214	-0.7384	0.214	-0.6456	0.214	-0.676		1.367	0.0832	0.214	-0.668	0.214	-0.682
0.213	-0.74	0.213	-0.6472	0.213	-0.6784		1.368	0.0829	0.213	-0.669	0.213	-0.684
0.212	-0.7408	0.212	-0.6488	0.212	-0.68		1.369	0.0827	0.212	-0.67	0.212	-0.686
0.211	-0.7424	0.211	-0.6496	0.211	-0.6816		1.37	0.0823	0.211	-0.671	0.211	-0.687
0.21	-0.7448	0.21	-0.6512	0.21	-0.6832		1.371	0.0821	0.21	-0.672	0.21	-0.689
0.209	-0.7456	0.209	-0.652	0.209	-0.6848		1.372	0.0819	0.209	-0.672	0.209	-0.691
0.208	-0.7472	0.208	-0.6536	0.208	-0.6864		1.373	0.0816	0.208	-0.673	0.208	-0.692
0.207	-0.7488	0.207	-0.6552	0.207	-0.6888		1.374	0.0814	0.207	-0.674	0.207	-0.694
0.206	-0.7496	0.206	-0.656	0.206	-0.6904		1.375	0.081	0.206	-0.675	0.206	-0.695
0.205	-0.752	0.205	-0.6576	0.205	-0.692		1.376	0.0808	0.205	-0.676	0.205	-0.697
0.204	-0.7536	0.204	-0.6584	0.204	-0.6944		1.377	0.0807	0.204	-0.676	0.204	-0.698
0.203	-0.7552	0.203	-0.66	0.203	-0.696		1.378	0.0803	0.203	-0.677	0.203	-0.7
0.202	-0.7568	0.202	-0.6608	0.202	-0.6976		1.379	0.0801	0.202	-0.678	0.202	-0.701
0.201	-0.7584	0.201	-0.6624	0.201	-0.6992		1.38	0.0799	0.201	-0.678	0.201	-0.703
0.2	-0.7592	0.2	-0.664	0.2	-0.7016		1.381	0.0797	0.2	-0.679	0.2	-0.705
0.199	-0.7616	0.199	-0.6648	0.199	-0.7032		1.382	0.0794	0.199	-0.68	0.199	-0.706
0.198	-0.7632	0.198	-0.6664	0.198	-0.7048		1.383	0.0792	0.198	-0.68	0.198	-0.708
0.197	-0.764	0.197	-0.6672	0.197	-0.7064		1.384	0.0789	0.197	-0.681	0.197	-0.71
0.196	-0.7664	0.196	-0.6688	0.196	-0.7088		1.385	0.0788	0.196	-0.682	0.196	-0.711
0.195	-0.768	0.195	-0.6696	0.195	-0.7104		1.386	0.0785	0.195	-0.682	0.195	-0.713
0.194	-0.7688	0.194	-0.6712	0.194	-0.712		1.387	0.0784	0.194	-0.683	0.194	-0.714
0.193	-0.7712	0.193	-0.6728	0.193	-0.7136		1.388	0.0781	0.193	-0.683	0.193	-0.715
0.192	-0.7728	0.192	-0.6736	0.192	-0.716		1.389	0.0792	0.192	-0.684	0.192	-0.717
0.191	-0.7736	0.191	-0.6752	0.191	-0.7176		1.39	0.0779	0.191	-0.684	0.191	-0.719
0.19	-0.776	0.19	-0.676	0.19	-0.7192		1.391	0.0779	0.19	-0.685	0.19	-0.72
0.189	-0.7776	0.189	-0.6776	0.189	-0.7208		1.392	0.0772	0.189	-0.685	0.189	-0.722
0.188	-0.7792	0.188	-0.6784	0.188	-0.7232		1.393	0.077	0.188	-0.686	0.188	-0.723
0.187	-0.7808	0.187	-0.68	0.187	-0.7248		1.394	0.0768	0.187	-0.686	0.187	-0.725
0.186	-0.7824	0.186	-0.6816	0.186	-0.7264		1.395	0.0766	0.186	-0.687	0.186	-0.726
0.185	-0.784	0.185	-0.6824	0.185	-0.7288		1.396	0.0765	0.185	-0.687	0.185	-0.728
0.184	-0.7856	0.184	-0.684	0.184	-0.7304		1.397	0.0762	0.184	-0.688	0.184	-0.729
0.183	-0.788	0.183	-0.6856	0.183	-0.732		1.398	0.0759	0.183	-0.688	0.183	-0.731
0.182	-0.7896	0.182	-0.6864	0.182	-0.7344		1.399	0.0763	0.182	-0.689	0.182	-0.732
0.181	-0.7912	0.181	-0.688	0.181	-0.736		1.4	0.0757	0.181	-0.689	0.181	-0.733
0.18	-0.7928	0.18	-0.6888	0.18	-0.7384		1.401	0.0753	0.18	-0.689	0.18	-0.735
0.179	-0.7944	0.179	-0.6904	0.179	-0.74		1.402	0.0751	0.179	-0.69	0.179	-0.736
0.178	-0.796	0.178	-0.6912	0.178	-0.7416		1.403	0.0749	0.178	-0.69	0.178	-0.738
0.177	-0.7976	0.177	-0.6928	0.177	-0.744		1.404	0.0747	0.177	-0.691	0.177	-0.739
0.176	-0.8	0.176	-0.6944	0.176	-0.7456		1.405	0.0745	0.176	-0.691	0.176	-0.74
0.175	-0.8	0.175	-0.696	0.175	-0.7472		1.406	0.0743	0.175	-0.691	0.175	-0.742
0.174	-0.8	0.174	-0.696	0.174	-0.7496		1.407	0.0742	0.174	-0.691	0.174	-0.743
0.173	-0.808	0.173	-0.6976	0.173	-0.7512		1.408	0.0739	0.173	-0.692	0.173	-0.745
0.172	-0.808	0.172	-0.6992	0.172	-0.7536		1.409	0.0737	0.172	-0.692	0.172	-0.746
0.171	-0.808	0.171	-0.7008	0.171	-0.7552		1.41	0.0735	0.171	-0.692	0.171	-0.747
0.17	-0.808	0.17	-0.7016	0.17	-0.7576		1.411	0.0734	0.17	-0.692	0.17	-0.749
0.169	-0.816	0.169	-0.7032	0.169	-0.7592		1.412	0.0732	0.169	-0.692	0.169	-0.75
0.168	-0.816	0.168	-0.7048	0.168	-0.7616		1.413	0.073	0.168	-0.692	0.168	-0.751
0.167	-0.816	0.167	-0.7064	0.167	-0.764		1.414	0.0727	0.167	-0.693	0.167	-0.753
0.166	-0.816	0.166	-0.7072	0.166	-0.7648		1.415	0.0726	0.166	-0.693	0.166	-0.754
0.165	-0.816	0.165	-0.7088	0.165	-0.7672		1.416	0.0725	0.165	-0.693	0.165	-0.756
0.164	-0.824	0.164	-0.7104	0.164	-0.7688		1.417	0.0723	0.164	-0.693	0.164	-0.757
0.163	-0.824	0.163	-0.7112	0.163	-0.7712		1.418	0.0721	0.163	-0.693	0.163	-0.758
0.162	-0.824	0.162	-0.7128	0.162	-0.7736		1.419	0.0719	0.162	-0.693	0.162	-0.76
0.161	-0.824	0.161	-0.7144	0.161	-0.7752		1.42	0.0718	0.161	-0.693	0.161	-0.761
0.16	-0.832	0.16	-0.716	0.16	-0.7776		1.421	0.0716	0.16	-0.694	0.16	-0.763
0.159	-0.832	0.159	-0.7168	0.159	-0.7792		1.422	0.0714	0.159	-0.694	0.159	-0.764
0.158	-0.832	0.158	-0.7184	0.158	-0.7816		1.423	0.0712	0.158	-0.694	0.158	-0.766
0.157	-0.832	0.157	-0.72	0.157	-0.784		1.424	0.0711	0.157	-0.694	0.157	-0.767
0.156	-0.84	0.156	-0.7208	0.156	-0.7856		1.425	0.0709	0.156	-0.694	0.156	-0.768
0.155	-0.84	0.155	-0.7224	0.155	-0.788		1.426	0.0707	0.155	-0.694	0.155	-0.769
0.154	-0.84	0.154	-0.724	0.154	-0.7904		1.427	0.0706	0.154	-0.694	0.154	-0.771
0.153	-0.84	0.153	-0.7256	0.153	-0.7928		1.428	0.0704	0.153	-0.694	0.153	-0.772
0.152	-0.84	0.152	-0.7264	0.152	-0.7952		1.429	0.0703	0.152	-0.694	0.152	-0.773
0.151	-0.848	0.151	-0.728	0.151	-0.7976		1.43	0.0706	0.151	-0.694	0.151	-0.775
0.15	-0.848	0.15	-0.7296	0.15	-0.7992		1.431	0.0701	0.15	-0.694	0.15	-0.776
0.149	-0.848	0.149	-0.7312	0.149	-0.8		1.432	0.0698	0.149	-0.694	0.149	-0.778
0.148	-0.856	0.148	-0.7328	0.148	-0.8		1.433	0.0697	0.148	-0.694	0.148	-0.779
0.147	-0.856	0.147	-0.7344	0.147	-0.808		1.434	0.0695	0.147	-0.694	0.147	-0.78
0.146	-0.856	0.146	-0.7352	0.146	-0.808		1.435	0.0694	0.146	-0.694	0.146	-0.782
0.145	-0.856	0.145	-0.7368	0.145	-0.808		1.436	0.0692	0.145	-0.694	0.145	-0.783
0.144	-0.864	0.144	-0.7384	0.144	-0.816		1.437	0.069	0.144	-0.694	0.144	-0.784
0.143	-0.864	0.143	-0.74	0.143	-0.816		1.438	0.0689	0.143	-0.694	0.143	-0.786
0.142	-0.864	0.142	-0.7416	0.142	-0.816		1.439	0.0688	0.142	-0.694	0.142	-0.787
0.141	-0.864	0.141	-0.7432	0.141	-0.824		1.44	0.0686	0.141	-0.694	0.141	-0.789
0.14	-0.872	0.14	-0.7448	0.14	-0.824		1.441	0.0685	0.14	-0.694	0.14	-0.79
0.139	-0.872	0.139	-0.7464	0.139	-0.824		1.442	0.0684	0.139	-0.694	0.139	-0.792
0.138	-0.872	0.138	-0.748	0.138	-0.832		1.443	0.0682	0.138	-0.694	0.138	-0.793
0.137	-0.872	0.137	-0.7496	0.137	-0.832		1.444	0.0681	0.137	-0.694	0.137	-0.795
0.136	-0.88	0.136	-0.7512	0.136	-0.832		1.445	0.068	0.136	-0.695	0.136	-0.797
0.135	-0.88	0.135	-0.7528	0.135	-0.84		1.446	0.0681	0.135	-0.695	0.135	-0.798
0.134	-0.88	0.134	-0.7544	0.134	-0.84		1.447	0.0677	0.134	-0.695	0.134	-0.8
0.133	-0.88	0.133	-0.756	0.133	-0.84		1.448	0.0675	0.133	-0.695	0.133	-0.801
0.132	-0.888	0.132	-0.7584	0.132	-0.848		1.449	0.0673	0.132	-0.696	0.132	-0.803
0.131	-0.888	0.131	-0.7592	0.131	-0.848		1.45	0.0673	0.131	-0.696	0.131	-0.805
0.13	-0.888	0.13	-0.7616	0.13	-0.856		1.451	0.0671	0.13	-0.697	0.13	-0.807
0.129	-0.888	0.129	-0.764	0.129	-0.856		1.452	0.0671	0.129	-0.697	0.129	-0.808
0.128	-0.896	0.128	-0.7648	0.128	-0.864		1.453	0.0669	0.128	-0.698	0.128	-0.81
0.127	-0.896	0.127	-0.7672	0.127	-0.864		1.454	0.0668	0.127	-0.698	0.127	-0.813
0.126	-0.896	0.126	-0.7688	0.126	-0.872		1.455	0.0667	0.126	-0.699	0.126	-0.814
0.125	-0.904	0.125	-0.7712	0.125	-0.872		1.456	0.0665	0.125	-0.7	0.125	-0.816
0.124	-0.904	0.124	-0.7736	0.124	-0.88		1.457	0.0663	0.124	-0.7	0.124	-0.818
0.123	-0.904	0.123	-0.7752	0.123	-0.88		1.458	0.0663	0.123	-0.701	0.123	-0.82
0.122	-0.904	0.122	-0.7776	0.122	-0.888		1.459	0.0661	0.122	-0.702	0.122	-0.822
0.121	-0.912	0.121	-0.7792	0.121	-0.888		1.46	0.0661	0.121	-0.703	0.121	-0.824
0.12	-0.912	0.12	-0.7816	0.12	-0.896		1.461	0.066	0.12	-0.704	0.12	-0.826
0.119	-0.912	0.119	-0.784	0.119	-0.904		1.462	0.0658	0.119	-0.705	0.119	-0.829
0.118	-0.92	0.118	-0.7864	0.118	-0.904		1.463	0.0657	0.118	-0.706	0.118	-0.831
0.117	-0.92	0.117	-0.788	0.117	-0.912		1.464	0.0656	0.117	-0.707	0.117	-0.833
0.116	-0.92	0.116	-0.7912	0.116	-0.912		1.465	0.0654	0.116	-0.708	0.116	-0.835
0.115	-0.92	0.115	-0.7936	0.115	-0.92		1.466	0.0654	0.115	-0.709	0.115	-0.837
0.114	-0.928	0.114	-0.7968	0.114	-0.928		1.467	0.0652	0.114	-0.71	0.114	-0.84
0.113	-0.928	0.113	-0.7984	0.113	-0.928		1.468	0.0654	0.113	-0.712	0.113	-0.842
0.112	-0.928	0.112	-0.8	0.112	-0.936		1.469	0.065	0.112	-0.713	0.112	-0.844
0.111	-0.936	0.111	-0.808	0.111	-0.944		1.47	0.0649	0.111	-0.714	0.111	-0.846
0.11	-0.936	0.11	-0.808	0.11	-0.952		1.471	0.0648	0.11	-0.716	0.11	-0.849
0.109	-0.936	0.109	-0.808	0.109	-0.952		1.472	0.0648	0.109	-0.717	0.109	-0.851
0.108	-0.944	0.108	-0.816	0.108	-0.96		1.473	0.0646	0.108	-0.719	0.108	-0.853
0.107	-0.944	0.107	-0.816	0.107	-0.968		1.474	0.0645	0.107	-0.72	0.107	-0.855
0.106	-0.944	0.106	-0.824	0.106	-0.976		1.475	0.0648	0.106	-0.722	0.106	-0.858
0.105	-0.952	0.105	-0.824	0.105	-0.976		1.476	0.0643	0.105	-0.724	0.105	-0.86
0.104	-0.952	0.104	-0.824	0.104	-0.984		1.477	0.0642	0.104	-0.726	0.104	-0.862
0.103	-0.952	0.103	-0.832	0.103	-0.992		1.478	0.0641	0.103	-0.728	0.103	-0.864
0.102	-0.952	0.102	-0.832	0.102	-1		1.479	0.0642	0.102	-0.73	0.102	-0.866
0.101	-0.96	0.101	-0.84	0.101	-1		1.48	0.0639	0.101	-0.732	0.101	-0.869
0.1	-0.96	0.1	-0.84	0.1	-1.008		1.481	0.0638	0.1	-0.734	0.1	-0.871
0.099	-0.96	0.099	-0.848	0.099	-1.016		1.482	0.0637	0.099	-0.736	0.099	-0.873
0.098	-0.968	0.098	-0.848	0.098	-1.024		1.483	0.0636	0.098	-0.738	0.098	-0.875
0.097	-0.968	0.097	-0.856	0.097	-1.032		1.484	0.0635	0.097	-0.74	0.097	-0.877
0.096	-0.968	0.096	-0.856	0.096	-1.04		1.485	0.0644	0.096	-0.742	0.096	-0.879
0.095	-0.976	0.095	-0.864	0.095	-1.04		1.486	0.0636	0.095	-0.745	0.095	-0.881
0.094	-0.976	0.094	-0.864	0.094	-1.048		1.487	0.0634	0.094	-0.747	0.094	-0.883
0.093	-0.976	0.093	-0.872	0.093	-1.056		1.488	0.0632	0.093	-0.75	0.093	-0.885
0.092	-0.984	0.092	-0.88	0.092	-1.064		1.489	0.0631	0.092	-0.752	0.092	-0.888
0.091	-0.984	0.091	-0.88	0.091	-1.072		1.49	0.0631	0.091	-0.755	0.091	-0.889
0.09	-0.984	0.09	-0.888	0.09	-1.072		1.491	0.063	0.09	-0.758	0.09	-0.892
0.089	-0.992	0.089	-0.888	0.089	-1.08		1.492	0.0629	0.089	-0.76	0.089	-0.894
0.088	-0.992	0.088	-0.896	0.088	-1.088		1.493	0.0629	0.088	-0.763	0.088	-0.896
0.087	-0.992	0.087	-0.904	0.087	-1.096		1.494	0.0627	0.087	-0.766	0.087	-0.898
0.086	-1	0.086	-0.904	0.086	-1.104		1.495	0.0627	0.086	-0.769	0.086	-0.9
0.085	-1	0.085	-0.912	0.085	-1.104		1.496	0.0626	0.085	-0.772	0.085	-0.903
0.084	-1	0.084	-0.912	0.084	-1.112		1.497	0.0626	0.084	-0.775	0.084	-0.904
0.083	-1.008	0.083	-0.92	0.083	-1.12		1.498	0.0628	0.083	-0.779	0.083	-0.907
0.082	-1.008	0.082	-0.928	0.082	-1.128		1.499	0.0624	0.082	-0.782	0.082	-0.909
0.081	-1.008	0.081	-0.936	0.081	-1.136		1.5	0.0631	0.081	-0.785	0.081	-0.912
0.08	-1.016	0.08	-0.936	0.08	-1.144		1.501	0.0628	0.08	-0.788	0.08	-0.913
0.079	-1.016	0.079	-0.944	0.079	-1.144		1.502	0.0625	0.079	-0.792	0.079	-0.916
0.078	-1.016	0.078	-0.952	0.078	-1.152		1.503	0.0629	0.078	-0.795	0.078	-0.919
0.077	-1.024	0.077	-0.952	0.077	-1.16		1.504	0.0628	0.077	-0.799	0.077	-0.92
0.076	-1.024	0.076	-0.96	0.076	-1.168		1.505	0.0626	0.076	-0.802	0.076	-0.923
0.075	-1.024	0.075	-0.968	0.075	-1.176		1.506	0.0625	0.075	-0.806	0.075	-0.926
0.074	-1.032	0.074	-0.976	0.074	-1.176		1.507	0.0622	0.074	-0.81	0.074	-0.928
0.073	-1.032	0.073	-0.976	0.073	-1.184		1.508	0.0621	0.073	-0.814	0.073	-0.93
0.072	-1.04	0.072	-0.984	0.072	-1.192		1.509	0.0619	0.072	-0.818	0.072	-0.933
0.071	-1.04	0.071	-0.992	0.071	-1.2		1.51	0.0616	0.071	-0.822	0.071	-0.936
0.07	-1.04	0.07	-1	0.07	-1.208		1.511	0.0616	0.07	-0.826	0.07	-0.939
0.069	-1.048	0.069	-1	0.069	-1.208		1.512	0.0614	0.069	-0.83	0.069	-0.941
0.068	-1.048	0.068	-1.008	0.068	-1.216		1.513	0.0614	0.068	-0.835	0.068	-0.944
0.067	-1.048	0.067	-1.016	0.067	-1.224		1.514	0.0612	0.067	-0.839	0.067	-0.947
0.066	-1.056	0.066	-1.024	0.066	-1.232		1.515	0.0612	0.066	-0.843	0.066	-0.95
0.065	-1.056	0.065	-1.032	0.065	-1.24		1.516	0.0611	0.065	-0.848	0.065	-0.954
0.064	-1.064	0.064	-1.032	0.064	-1.24		1.517	0.061	0.064	-0.852	0.064	-0.957
0.063	-1.064	0.063	-1.04	0.063	-1.248		1.518	0.0609	0.063	-0.857	0.063	-0.96
0.062	-1.064	0.062	-1.048	0.062	-1.256		1.519	0.0609	0.062	-0.862	0.062	-0.964
0.061	-1.072	0.061	-1.056	0.061	-1.264		1.52	0.0607	0.061	-0.867	0.061	-0.967
0.06	-1.072	0.06	-1.064	0.06	-1.272		1.521	0.0607	0.06	-0.871	0.06	-0.971
0.059	-1.072	0.059	-1.072	0.059	-1.28		1.522	0.0606	0.059	-0.876	0.059	-0.974
0.058	-1.08	0.058	-1.072	0.058	-1.28		1.523	0.0606	0.058	-0.881	0.058	-0.978
0.057	-1.08	0.057	-1.08	0.057	-1.288		1.524	0.0605	0.057	-0.887	0.057	-0.981
0.056	-1.088	0.056	-1.088	0.056	-1.296		1.525	0.0604	0.056	-0.892	0.056	-0.986
0.055	-1.088	0.055	-1.096	0.055	-1.304		1.526	0.0603	0.055	-0.897	0.055	-0.989
0.054	-1.096	0.054	-1.104	0.054	-1.312		1.527	0.0603	0.054	-0.902	0.054	-0.994
0.053	-1.096	0.053	-1.112	0.053	-1.312		1.528	0.0602	0.053	-0.908	0.053	-0.998
0.052	-1.096	0.052	-1.12	0.052	-1.32		1.529	0.0602	0.052	-0.913	0.052	-1
0.051	-1.104	0.051	-1.128	0.051	-1.328		1.53	0.0601	0.051	-0.919	0.051	-1.01
0.05	-1.104	0.05	-1.128	0.05	-1.336		1.531	0.06	0.05	-0.924	0.05	-1.01
0.049	-1.112	0.049	-1.136	0.049	-1.344		1.532	0.06	0.049	-0.93	0.049	-1.02
0.048	-1.112	0.048	-1.144	0.048	-1.344		1.533	0.0599	0.048	-0.935	0.048	-1.02
0.047	-1.112	0.047	-1.152	0.047	-1.352		1.534	0.0598	0.047	-0.942	0.047	-1.02
0.046	-1.12	0.046	-1.16	0.046	-1.36		1.535	0.0598	0.046	-0.947	0.046	-1.03
0.045	-1.12	0.045	-1.168	0.045	-1.368		1.536	0.0596	0.045	-0.953	0.045	-1.03
0.044	-1.128	0.044	-1.176	0.044	-1.376		1.537	0.0597	0.044	-0.958	0.044	-1.04
0.043	-1.128	0.043	-1.184	0.043	-1.376		1.538	0.0596	0.043	-0.964	0.043	-1.05
0.042	-1.136	0.042	-1.192	0.042	-1.384		1.539	0.0595	0.042	-0.971	0.042	-1.05
0.041	-1.136	0.041	-1.2	0.041	-1.392		1.54	0.0595	0.041	-0.977	0.041	-1.06
0.04	-1.144	0.04	-1.208	0.04	-1.4		1.541	0.0594	0.04	-0.983	0.04	-1.06
0.039	-1.144	0.039	-1.216	0.039	-1.408		1.542	0.0594	0.039	-0.989	0.039	-1.07
0.038	-1.144	0.038	-1.216	0.038	-1.416		1.543	0.0593	0.038	-0.995	0.038	-1.07
0.037	-1.152	0.037	-1.224	0.037	-1.416		1.544	0.0593	0.037	-1	0.037	-1.08
0.036	-1.152	0.036	-1.232	0.036	-1.424		1.545	0.0592	0.036	-1.01	0.036	-1.08
0.035	-1.16	0.035	-1.24	0.035	-1.432		1.546	0.0591	0.035	-1.01	0.035	-1.09
0.034	-1.16	0.034	-1.248	0.034	-1.44		1.547	0.0591	0.034	-1.02	0.034	-1.09
0.033	-1.168	0.033	-1.256	0.033	-1.448		1.548	0.059	0.033	-1.03	0.033	-1.1
0.032	-1.168	0.032	-1.264	0.032	-1.448		1.549	0.0591	0.032	-1.03	0.032	-1.11
0.031	-1.176	0.031	-1.272	0.031	-1.456		1.55	0.0589	0.031	-1.04	0.031	-1.11
0.03	-1.176	0.03	-1.28	0.03	-1.464		1.551	0.059	0.03	-1.05	0.03	-1.12
0.029	-1.184	0.029	-1.288	0.029	-1.472		1.552	0.0589	0.029	-1.05	0.029	-1.12
0.028	-1.184	0.028	-1.296	0.028	-1.48		1.553	0.0588	0.028	-1.06	0.028	-1.13
0.027	-1.192	0.027	-1.304	0.027	-1.488		1.554	0.0587	0.027	-1.07	0.027	-1.13
0.026	-1.192	0.026	-1.312	0.026	-1.488		1.555	0.0587	0.026	-1.07	0.026	-1.14
0.025	-1.2	0.025	-1.32	0.025	-1.496		1.556	0.0587	0.025	-1.08	0.025	-1.15
0.024	-1.208	0.024	-1.328	0.024	-1.504		1.557	0.0586	0.024	-1.09	0.024	-1.15
0.023	-1.208	0.023	-1.336	0.023	-1.512		1.558	0.0585	0.023	-1.1	0.023	-1.16
0.022	-1.216	0.022	-1.344	0.022	-1.52		1.559	0.0585	0.022	-1.1	0.022	-1.17
0.021	-1.216	0.021	-1.352	0.021	-1.52		1.56	0.0584	0.021	-1.11	0.021	-1.17
0.02	-1.224	0.02	-1.36	0.02	-1.528		1.561	0.0584	0.02	-1.12	0.02	-1.18
0.019	-1.224	0.019	-1.368	0.019	-1.536		1.562	0.0584	0.019	-1.12	0.019	-1.18
0.018	-1.232	0.018	-1.376	0.018	-1.544		1.563	0.0583	0.018	-1.13	0.018	-1.19
0.017	-1.24	0.017	-1.384	0.017	-1.552		1.564	0.0582	0.017	-1.14	0.017	-1.2
0.016	-1.24	0.016	-1.392	0.016	-1.56		1.565	0.0582	0.016	-1.15	0.016	-1.2
0.015	-1.248	0.015	-1.4	0.015	-1.56		1.566	0.0581	0.015	-1.15	0.015	-1.21
0.014	-1.256	0.014	-1.408	0.014	-1.568		1.567	0.0581	0.014	-1.16	0.014	-1.22
0.013	-1.256	0.013	-1.416	0.013	-1.576		1.568	0.0581	0.013	-1.17	0.013	-1.22
0.012	-1.264	0.012	-1.424	0.012	-1.584		1.569	0.058	0.012	-1.18	0.012	-1.23
0.011	-1.272	0.011	-1.432	0.011	-1.592		1.57	0.0581	0.011	-1.18	0.011	-1.24
0.01	-1.272	0.01	-1.44	0.01	-1.592		1.571	0.0579	0.01	-1.19	0.01	-1.24
0.009	-1.28	0.009	-1.448	0.009	-1.6		1.572	0.0579	0.009	-1.2	0.009	-1.25
0.008	-1.288	0.008	-1.456	0.008	-1.608		1.573	0.0579	0.008	-1.2	0.008	-1.26
0.007	-1.296	0.007	-1.464	0.007	-1.616		1.574	0.0578	0.007	-1.21	0.007	-1.26
0.006	-1.296	0.006	-1.472	0.006	-1.624		1.575	0.0578	0.006	-1.22	0.006	-1.27
0.005	-1.304	0.005	-1.48	0.005	-1.632		1.576	0.0577	0.005	-1.23	0.005	-1.28
0.004	-1.312	0.004	-1.488	0.004	-1.632		1.577	0.0577	0.004	-1.23	0.004	-1.28
0.003	-1.32	0.003	-1.496	0.003	-1.64		1.578	0.0578	0.003	-1.24	0.003	-1.29
[truncated: 6,003 more rows]
